# Supplementary material
Source: ML conference proceedings conference paper supplement (https://openreview.net/forum?id=r6QZ8YKSBd)
Supplement: supplementary_material [file attachment]

## Sheet: Sheet1
	Statement	Old Label	New Label	Reason
0	Network Engineer here- 23 and currently working as an instructor teaching men and women looking to be in IT =] Next I want to teach at a University!	0	0
1	I'm still hiding my gender to my parents and they don't know I'm dating someone. My friends knows already about my gender and they are very supportive of it. And I'm very thankful to find true friends like them	0	0
2	all lives matter .without that we never have peace so to me forever all lives matter.	0	3	ALM was used against the BLM movement to criticize it
3	Randomgirlwhosings0804 Why does she feel the need to have to agree or not agree with someone’s sexuality? Why does any Christian? it’s really weird. there is nothing for you to “agree” with	0	0
4	it doesn't matter what your family does when you want to make a career for yourself. what matters is what you can or will do. you're in no better position then the one who comes from a poor family and also wanting to be a video game developer.	0	0
5	Sasha Dumse God accepts everyone.	0	0
6	I feel so base for that guy! They treated him as if he wasn’t a human just because of who he loved! 🥺	0	0
7	I am so glad that you made your toy!!! I wouldn't have extended my love for science!!! I feel like I don't fit in at school sometimes	0	0
8	I'm so proud for her	0	0
9	She saves lives with her music.	0	0
10	All Humans matter. Whats with labeling color!!! Dogs matter. Cats matter. Bees matter. Trees matter. Americans matter.	0	3	ALM was used against the BLM movement to criticize it
11	The things that she has done are magnificent.She has personally flewn to Mexico to buy her friend some medicine for AIDS.This is not your everyday type of woman.Shes so intelligent too.I don’t think she’s appreciated enough.	0	0
12	Only one race the Human Race	0	3	ALM was used against the BLM movement to criticize it
13	My mom teaches high school physics	0	1	need context. else, neutral
14	People need to blame themselves for their own selfish bad behaviour.	0	0
15	any group that reinforces who you must be; who one is deserves such devotion. Madonna is really a wonderful woman to some people	0	0
16	This made me cry. So many things in contemporary Christian culture are such a horrid distortion of what Christianity is meant to be. What that boy said about choosing to love? That’s what Christianity is about	0	0
17	You are still young maybe you can try	0	0
18	Awesome! Not only that you've created (engineered	0	0
19	I never understood racism. I grew up thinking what’s the problem with with different colored humans they’re literally the same but different colors.nTo this day I still don’t know why people think 1 race of humans is better than another race when they’re exactly species	0	0
20	We all bleed the same...	0	0
21	I agree that there are some bad cops yes I'll admit it. But most are good. I agree George shouldn't have been killed but it seems the cop just over estimated his strength.	0	0
22	you have encouraged me thank you for sharing	0	0
23	ALL LIVES MATTER...IM FROM THE SEYCHELLES WE HAVE DIFFERENT TYPE OF PEOPLE	0	3	ALM was used against the BLM movement to criticize it
24	@jzizzles dont worry I'm Christian and I'm both trans and bisexual so yeah that's a thing like God said men shall not lay with man but that was mistranslated its actually man shall not lay with boy meaning pedophilia so homosexuality is not in the bible and religion shouldn't stop people from loving who they love yk	0	0
25	This was so inspiring to me.Nowadays many people doubt about women becoming engineers.But I’m sure next generation is going to make a change.I’m from Argentina and next year I’ll finish high school and I will study environmental engineering.	0	0
26	We were all made in God’s image. All lives matter!!!	0	3	ALM was used against the BLM movement to criticize it
27	“Injustice anywhere is a threat to justice everywhere.” ~Martin Luther King Jr.	0	0
28	@Amazing Worenwu all lives means we are all equal	0	3	ALM was used against the BLM movement to criticize it
29	+Ancient Soul oh Lord. I don't think you'll ever understand. There's a specific context in which the black lives matter movement arose. Because black people were being killed and there were multiple incidents of the same type of thing. What exactly is the context for the all lives matter movement and focusing on the whole world? It was only created as a combatant otherwise it wouldn't even exist.…	0	0
30	A walkway overpass bridge in Miami was built by female engineers with no arch	0	0
31	All lives matter and at the same time criminals should be dealt with as per the law.	0	3	ALM was used against the BLM movement to criticize it
32	+littlemermaid GO for it! Show us how it is done! Your way!	0	0
33	i don't believe in lying about yourself to make other people happy.	0	0
34	You can do it! Believe in yourself!	0	0
35	That is absolutely a contradiction though. Apples are real. But you can't disagree with apples. Homosexuality is real. And you can't disagree with it. @BeeWee	0	0
36	Jimmy Pop just let her live her life the way she chooses to and you live yours. A very simple concept.	0	0
37	I agree racism is aids. But tearing down the statue is utter bullshit. It’s not like people go there to admire him	0	0
38	OmG I love this talk. Debbie that was amazing. Lovely	0	0
39	S Mckenzie You will make it Sis...Just dont give up !!! All the best !!! By the way	0	0
40	she seems very genuine and emotional here. i feel like i’ve not seen this side of her in forever. so much love	0	0
41	Guaranteed by law freedom	0	0
42	ALL LIVES MATTER. i get what they went through but that’s in the past you can’t bring that up in a defense.	0	3	ALM was used against the BLM movement to criticize it
43	She has a really interesting life story and she's funny.	0	0
44	I'm so glad my parents always gave me puzzles and remote controlled cars and let me tinker on small appliances as a kid. I was never drawn to baby dolls and Princess shit	0	0
45	Lol I was thinking sthg on similar lines based on the body language n pose etc. It's fine. Love to that person. It's hard to go through anything like that ...	0	0
46	All lives matter......well	0	3	ALM was used against the BLM movement to criticize it
47	If she comes out at this point it must be a choice..... nn(jk annie we all support you no matter what)	0	0
48	We need a religion where everyone is accepted. One where you’re free to love and be happy. One where you can be yourself.	0	0
49	Thank you very much for this! This inspired me sm	0	0
50	That's probably because they're still in the closet due to their christian brainwashing from their church. It happens a lot in Christian communities. Usually when they start to live outside that community then theh might just might come out. I grew up in a Christian community so I say this from seeing my LGBTQ friends come out not until their early 20s or even later. I love them all which is one …	0	0
51	@Al Nevermind they don't need to change... they are born that way... there is nothing wrong with it... LGBT have been present for all time... religion' created by man... is what unnecessarily criminalizes it... would you advocate proselytization...? Converting gays (never possible) is just as despicable.	0	0
52	All Lives Matter	0	3	ALM was used against the BLM movement to criticize it
53	@James Johnson HAHA good mangina comeback. women got banned from getting education.... so were most men. What's your point? And why do you talk about history? We live at this moment. Women are the majority of degree receipients in Associates	0	0
54	Thank you I am a young girl wanting to be a engineer but gladly the people around me are much more accepting I have a very good friend who is a boy and we both love engineering and I have build robots before for the age of 11 and he had made very detail trucks and vehicles before he was 12nnEdit	0	0
55	This woman changed the world and keeps changing it. Including my life. Thank you	0	0
56	All Lives Matter - especially now.	0	3	ALM was used against the BLM movement to criticize it
57	“My choice is to love.nnMe crying and sobbing because of how awesome that kid is	0	0
58	“Hate’s not going to get you anywhere in the world. God gave us a choice. My choice is to love.” I cried	0	0
59	Also abusive and should be a crime. It is literally torture	0	0
60	I wouldn't say I'm AGAINST homophobia and people who are homosexual (also part of the LGBTQ+ community) as AGAINST is too much of a strong word. I don't agree with it	0	0
61	I will always be thankful for Madonna! She’s A reason I’m not afraid to be me. I even have a portrait of her	0	0
62	Yes that was genuine. Bless her. Never give up hope love you lady.x	0	0
63	Why is it black vs white and not (vs the people who control the institutions ?) all whites ain’t the enemy . To be honest looking at the climate just for saying “all lives matter” or WLM you get fired and dragged .	0	0
64	@Clinically Happy using the term black lives matter degrades everyone else's struggles. All lives matter argues equality for all and to bring down all discrimination and racism.	0	3	In this context it could be thought of as hopeful, but the context of ALM being used against BLM makes it controversial.
65	She fight and defend	0	0
66	There is only ONE race...the human race.	0	0
67	I think the best way to fit in is to be yourself work hard and don't accept immature behavior by men or womenThe truth is you do want to be pretty it is natural I want to be handsome but I don't let this thought drive my beingStop blaming your surroundings	0	0
68	Ohhh I would have loved that game! Thank you for marketing construction toys to girls. I've always loved them as a little girl	0	0
69	It's most definitely racist all life matters no matter what all men were created equal and that means they all have a life and if they lose that life including black white pink orange whatever it is gone forever	0	3	In this context it could be thought of as hopeful, but the context of ALM being used against BLM makes it controversial.
70	I’m 16 I love math. But I’m unsure of my future careers I’m thinking about engineering but am unsure but this video touched me.	0	0
71	The kid who said he chose to love is very smart and mature for his age to say something like that. It’s nice to see that there are still kids like that who believe in being kind to one another and not trying to fit in if it means being mean	0	0
72	People think that the LGBT+ Community isn’t really hurt or pushed around in any way. nThis is proof that this stuff still happens	0	0
73	I'm about to start my career in civil engineering in a few months! you can do it	0	0
74	I couldn't imagine going through that. He's so strong! Thankful for all of the people that stood up for equality. Love all of you	0	0
75	@Ikaika Corpus That's good. Still along way to go though.	0	0
76	I don't agree with homosexuality That's like saying I don't agree with French. There's nothing to agree with agree or disagree with	0	0
77	All lives matter 2020. (Including the unborn)	0	3	ALM was used against the BLM movement to criticize it
78	makes me really proud to say that 40% of my engineering class is female!	0	0
79	How about Black lives are equal. Because they are still the center of the topic and they just seek equality which this country has proven not to have given them in the past.	0	0
80	My mom is an engineer	0	1	Neutral statement. Not enough context to judge if it was meant in a hopeful way or not
81	i think watching crystal in these videos it's amazing just how mature she is for her age very rare but encouraging as well	0	0
82	Me too i am studying civil engineering. And i love it....and classical music too	0	0
83	“God gave us a choice	0	0
84	Only people can understand Madonna who has gone through so much pain as she did the battle losing her son and other emotional things	0	0
85	@t0bias busterud You are missing my point. I find it impossible to understand that a movement that is trying to redress inequality has a main banner statement of inequality. I am not putting the importance of any race over any other. The statement White Lives Matter is just as wrong as Black Lives Matter. I am sure the movement has some valid points but the cause is not helped by a provocative ba…	0	3	In this context it could be thought of as hopeful, but the context of ALM being used against BLM makes it controversial.
86	I won't give up bc u were there for me and you continue here. I have to fight too.	0	0
87	This is amazing. I found my passion for engineering with GoldieBlox. Boredom one night led me to this TED Talk and now it’s clear that whatever she’s doing is working.	0	0
88	You belong anywhere that you choose to belong. You fit in. Do not let internalised misogyny stop women from becoming equal in all fields.	0	0
89	Love your neighbor as you would love your self that's in the Bible right?	0	0
90	Anurag Pal how is she forcefully making u do engineering? Shes trying to inspire. If u dont want to do it thats your choice but shes trying to encourage the ppl that do want to do it as a career choice. I dont get how anything she does is forcefull?	0	0
91	I was inspired since always since wen I was 10/11	0	0
92	Again all lives matter	0	3	ALM was used against the BLM movement to criticize it
93	bliss_cl I totally understand I just think the slogan sounds racist	0	0
94	With all these protest.......nWe all forgot one thing.....nnnnThe corona is still out there.....	0	1	Without further context, cannot judge if this is meant in a hopeful way or not
95	God gave us choice. My choice is to love. .....I'm not crying. You're crying. What a lovely young person.	0	0
96	My brother is bi and I support him very much ‍	0	0
97	Doesn’t matter what religion u practice or if u even believe in a god	0	0
98	Not agreeing with someone's sexuality is like not agreeing with someone's skin colour. It's part of who they are. nnIs there an aversion therapy for being heterosexual	0	0
99	BLM stands for big losers matter all these protests are just losers who are on government support and have nothing better to do	2	3	Criticizing and deprecating the BLM movement
100	Love Wins I have always thought that! I grew up with her and her music. Music today is auto tuned BS. They call her old	0	0
101	9.20 To never give hope - to never give up ! She said it with conviction .	0	0
102	“God gave us a choice and my choice is to love” MY HEART	0	0
103	I want to be a biomedical engineer. This video has helped me so much. I’m only 14 but it’s been my dream for about a year now. I hope one day I will be as successful and brave as this woman	0	0
104	All life matter period and thats black matter too	0	3	In this context it could be thought of as hopeful, but the context of ALM being used against BLM makes it controversial.
105	Female engineer in the making and I'm loving every step of the journey	0	0
106	@DANIEL LEEPER nothing was sexual in the discussion. It was all about a man who has been mistreated for being who he is.nHave you noticed that none of the kids being uncomfortable? They were discussing with an adult about a bad thing that still happens. In fact	0	0
107	Awesome!! Debbie Sterling this is a great deal for our young daughters.	0	0
108	All lives matter. There I said it. God bless you sir. I don't know you from diddly squat. I have respect for you. Because you wear the badge and the uniform. You come across all kinds of people good or bad. God bless you and men and women that are in law enforcement. Some cops do good no matter what. There is good and bad in all people. Just remember folks we bleed the same color. God bless the U…	0	3	In this context it could be thought of as hopeful, but the context of ALM being used against BLM makes it controversial.
109	well guess what kiddo. I'm 11 and I made a platformer with C++ and a opengl framework. Get with the flow and get your head out of the clouds.	0	0
110	All lives matter one race is not above another.	0	0
111	studying nuclear engineering .. U r really inspiring	0	0
112	Hey white guy here in if I say I'm an engineer people don't believe me either. it's not sexism it's skepticism. stop making everything about race and gender instead of logic	0	0
113	These women ARE in STEM	0	0
114	@lil dude serious? There's people watching videos about innocent Muslims living their daily lives but yet there are those western comments hating on them and calling them terrorists. somehow those people deserve more positive attention than LGBT since innocent muslims are getting killed . nJust an example on how stupid your comment was	0	0
115	I haven't come out to my family yet.. They aren't religious they think that it doesn't matter who you like.. You just have to be a good person but I'm still so scared to tell them.. I've told my friends.. My best friends we're fine with it	0	0
116	These protesters have completely disregarded the feelings of the majority of the people who don’t want the statue to be removed. And when these people actually did take it down they end up throwing it in the river! Like that is the example a modern society is supposed to be taking when we are all meant to be more environmentally conscious about dumping. I hope they are able to fish it out of the …	0	0
117	@PepeThePoopyPants I believe women should have the freedom to work and vote and live as anyone else	0	0
118	Yo actually stop demonizing christians. We don’t hate LGBTQ ppl	0	0
119	I'm so inspired. I am 14 years old. I want to be a civil engineer but people around me	0	0
120	I think it's cool that you give people a voice to speak out with here on this channel.	0	0
121	I think this is my new favourite Madonna interview... thank you for holding my hand through some of the worst of it Bless you M !!	0	0
122	you'll make it no doubt! you seem so passionate and hardworking	0	0
123	All lives matter i agree with	0	3	ALM was used against the BLM movement to criticize it
124	that kid asking for advice for being a good friend gave me hope. that was so cute!	0	0
125	CASA. LA. FEMMEnWesT. ViLLAGEn2008nNyc	2	2
126	I’m a girl. I played with legos (even as a teenager)	0	0
127	ALL lives matter! That includes all baby’s. Jesus help this world!	0	3	ALM was used against the BLM movement to criticize it
128	All lives matter ! why is Black live matter ? Why is White live matter ? Why is Yellow live matter ? All lives matter ! But do what you think its right ! Never ever mistaken between Criminals and Heroes !	0	3	In this context it could be thought of as hopeful, but the context of ALM being used against BLM makes it controversial.
129	and also the bible was badly translated so actually there is nothing against gays in it and also nTREAT YOUR NEIGBORS LIKE YOU WANT THEM TL TREAT YOU	0	0
130	I came out to my father on October 11	0	0
131	No they are not. All lives matter	0	0
132	ALL LIVES MATTER...... God created us all and loves us all!	0	3	In this context it could be thought of as hopeful, but the context of ALM being used against BLM makes it controversial.
133	@Molly Rebekah You are just as bad as everyone else yeah not everyone believes in God I don't either and you may think you are doing good but you are actually causing harm do you think LGBT people choose to be LGBT no bc if it was a choice no one person would choose to be discriminated against and beaten up and killed for who they love conversion therapy is awful and shouldn't even be a thing and…	0	0
134	I'm a 68 yo white male and I say All Lives Matter.	0	3	ALM was used against the BLM movement to criticize it
135	Don't worry.. Tough time too shall pass	0	0
136	Spot on bro... People divide instead of unite... And that is what the elite wants. This war agaist races is total bs... All lives should matter. There are bad and good people of all ethinicity	0	0
137	please hug that little girl 🥺🥺	0	0
138	the blm movement could do so much more to get respect out of the community	0	0
139	I mean it's a male dominated field of course people r surprised to learn your an engineer. Also it's probably only a male dominated field because most women don't study engineering and pick something like liberal arts. I'm just saying	0	0
140	i want to study either software engineering or computer science and this video is really inspiring	0	0
141	I'm sorry but saying black lives matter is excluding other races which it in itself is racist	0	3	In this context it could be thought of as hopeful, but the context of ALM being used against BLM makes it controversial.
142	It's nice to see another religious but also a lgbt person	0	0
143	Hey I’m bisexual too	0	0
144	ALL LIVE MATTER. All controversy over this is caused by racist bigots. Black lives mater is a racist statement and supports segregation. Black lives matter supports black supremacy just as KKK supports white supremacy. Black lives matter and KKK ate both equally racist. Plain and simple.	0	3	In this context it could be thought of as hopeful, but the context of ALM being used against BLM makes it controversial.
145	Melanie Schneiderman nWe are all call to love everyone and see their beauty. 🧡	0	0
146	I’m not Christian (tbh I’m not apart of any religion) but god accepts everyone and it’s not cool to be the same. We were made to be different not to just protest about someone’s choice of sexuality or religion	0	0
147	Wtf is up with the negativity by men here? Just because she's building toys for girls and encouraging them to go for engineering majors	0	0
148	I hope he helps her come out of the closet.	0	0
149	I really hope I can become an engineer and and influencer like you some day ! God bless	0	0
150	Jesse Pollack I’m not against lgbt	0	0
151	I'm a Christian but I choose not to judge. It's not my place to judge others and so I love everyone... plus I might be a lil bi so there's that🤷‍	0	0
152	I RESPECT LGBTQ PEOPLE!!!! SUPPORTING Y'ALL TILL MY LOVE GIVES OUT!! 🤩n༼(∩ ͡°͜ʖ͡ ͡°)༽⊃	0	0
153	I have twenty years of construction and fabrication work.I've seen so many engineering mistakes(Male and female engineers)	0	0
154	Pretty and smart	0	0
155	Seriously people. Don't be so god damned quick to believe EVERYTHING that you read...... ESPECIALLY when we're talking about articles that are being google translated and quite often deliberately missquoted and/or misinterpreted.	0	0
156	asian black native america as long as you are not white white to them you are black and NOT important so when we say black we mean people of darker tone or skin or people who they are racist towards because we dont look like them so they treat us different so we need to be united and fight against racism for the racist anyone different from them if beneath them so we fight for our children and fo…	0	0
157	this makes me hurt so badly . conversion therapy is abuse and there is no use for it. you can’t change who people love.	0	0
158	“I don’t agree with homosexuality” boy someone ought to teach you some manners! Nah but seriously people need to realize that this is not a choice. I have a classmate who is bisexual (it’s a girl) and she absolutely loves girls but she can’t be in an open relationship because her parents would despise her if they ever found out. Being against someone who is LGBT is basically being against people’…	0	0
159	The people in the young boy's life are doing such a great job! You can see he's already becoming his own person and being a really positive force.	0	0
160	It wasn’t erected as a symbol of slavery... it wasn’t a symbol of racial profiling... it was erected as historical significance for what he did to help build in the city... on the basis of your argument you’d have idiots destroying 90% of all historical buildings and monuments in the uk. Protest peacefully not ok to go around defacing property as a mass mob. Abide by the law or face the consequen…	0	0
161	I lived my life as a lesbian for 15 years..and I was accepted by friends and family..i started dating a man and lost all my friends and my family found it kind of difficult to accept.	0	0
162	You can be anything!	0	0
163	as another Christian (and queer myself hehe) I couldn't agree more. those Christians working for conversation therapies do so much harm and hate towards others and shouldn't be considered Christians at all but extremists.	0	0
164	The definition of racism is when one colour is portrayed as more superior than another	0	0
165	All Lives Matter	0	3	ALM was used against the BLM movement to criticize it
166	This is very inspiring! I'm actually hesitating on taking engineering. Not only because I grew up thinking it's for boys only but also because I don't even know what engineers do. Thank you for this. Now	0	0
167	im a catholic lesbian	0	0
168	What a strong man to go through that abuse super happy that he stayed himself and that he can talk about it...i am glad this generation we can understand that everyone is different	0	0
169	@10 out of 10 She uses her platform. And we're better off because of it.	0	0
170	+Steven T.Parker Is never wrong to have an inspiration to do something and everything can be for you if you like it and work hard. And about this not being a touchy feely subject it is for her different things mean different things for different people. Maybe you don't care but you haven't face the problems or fears she has.	0	0
171	She could be queer and believe homosexuality is a choice. Those don't relate.	0	0
172	My sister is a lesbian ... nIts not that easy (for everyone) nMaybe im just stuck up and still think she is to young to decide who she is (she is 18...)nIt was still a hard thing for me to hear	0	0
173	All lives DO MATTER but the question is out of CONTEXT. Those who answer this question fall into the TRAP!	0	0
174	Imagine if after Martin Luther King jr’s “I have a dream speech” white peoples went around shouting “all colors have a dream too” nnLike seriously 🤦‍ do you guys have to make everything about you nnnBlack peoples are trying to fight for justice by saying they matter nnAnd you white people have to come out of nowhere screaming all “lives matter” 🤦‍ seriouslynnThis fight for their justice has nothi…	0	0
175	my choice is to love	0	0
176	No one is better than anyone else we are equal........	0	0
177	ONE BARBIE (10$) IS WORTH 50 TRANSISTORS (20 cents)nBuy your girls Arduinos. Buy them a breadboard. Electronics is so friggin cheap. And so fun	0	0
178	And I had a napkin over it cause I had to protect my intellectual property was already loving this talk but this got me even more	0	0
179	Keep persevering. Anyone can become a great engineer	0	0
180	In my country there is no big discrimination against women pursuing degree	0	0
181	I thought this was going to be another I need feminism because... speeches. What a pleasant surprise to wind up being moved and uplifted by her talk!nInstead of griping about all the problems	0	0
182	1 - Imposing conversion therapy on anyone is evil. It is terrible humans pretending they speak for God and have a right to be cruel and judgmental in his name.n2 - Once again	0	0
183	All lives matter.. there I said it..	0	3	ALM was used against the BLM movement to criticize it
184	This interview was so so deep and emotional!!!nI loved it!!! Really!!nMadonna is the greatest artist of all time!!!nShe’s a fighter!!!nI love her so much	0	0
185	I'm a computer science major and I feel the same way - I'm often visibly one of only two or three (I assume) women in the lectures of 100+ Computing & related students.	0	0
186	The Constitution matters because if followed everyone is equal under the foundation of the constitution! United we stand divided we fall!	0	0
187	i like that it was in toronto. i live in canada. the most racist province you can find yourself in is Alberta because its essentially the texas of canada. Toronto and British Columbia are the most diverse and inclusive places to be. while i won't say racism doesn't exist here	0	0
188	I judge pple on what they do not there color	0	0
189	its 2am and I'm watching this and crying at how inspirational this is. as a female engineering student this really motivates me to not lose faith.	0	0
190	im a lesbian I am 19 right now and I just got out of Conversion Therapy a month ago it was pure abuse I say its no fun they didn't hit me with a bible but they have me in a locked room with nothing in it like I was insane and read the bible on a loud speaker and not feed me I don't see how this is allowed they throw holy water in my face and say I came from the devil and here I am out of Conversi…	0	0
191	after watching this video i feel more confident in me. what i have chosen in past Mechanical Engineering	0	0
192	“God gave us a choice. My choice is to love“ That is the sweetest thing I’ve ever heard	0	0
193	Beautiful interview. She has done so much for the LGBTQ community over her 35-year music career. This was such a genuine and heartfelt interview. What a beautiful person she is!	0	0
194	Don't force things unless you feel comfortable. You got this	0	0
195	Just because she disagrees with homosexuality doesn’t mean she’s homophobic	0	0
196	@Pink Chalk I hope you succeed! Good luck to you and all the women out there!	0	0
197	This woman is a genius. What a great speech	0	0
198	All life's matter....	0	3	ALM was used against the BLM movement to criticize it
199	Everyone needs to learn that saying black lives matter doesn't mean other lives don't. Think of it as saying black lives matter too.	0	0
200	I’m stunned by the number of sexist comments by males here. What’s more interesting to me is why so many males are insecure about the fact that women are entering the field of engineering. This isn’t a war - what are you so afraid of? That your masculinity/intelligence is under attack? Well	0	0
201	Inspiring. Although I'm a guy	0	0
202	What seems SATANIC here is you...	2	1	Without further context this statement is demonizing someone
203	!All loves matter! Not color added all lives	0	3	ALM was used against the BLM movement to criticize it
204	This is the best speech I’ve ever heard! So inspirational! I’m 14 and I want to be an engineer. I dropped Drama for product design a few months ago and it was the best decision I ever made! It’s now my favourite subject! But I’m in a class of about 20-25 and there’s only 2 girls (that’s including me)	0	0
205	I am a teenager and I dream of being an engineer! nThis is so inspiring; thank u!	0	0
206	I’m lesbian and Christian and I think that’s completely okay...God doesn’t hate anybody ‍	0	0
207	I won't give up bc u were there for me and you continue here. I have to fight too.	0	0
208	All life's matter anyone who says other wise is rasist.	0	3	ALM was used against the BLM movement to criticize it
209	Not matter if you like man or woman god love you all equal	0	0
210	@CLIP IT! You need to stop! They can choose how they want to live!	0	0
211	@mrsimmons2252 Every being is essentially justified by the mere fact it exists. That is a universal truth. Then beings come to relative arrangements among themselves	0	0
212	I just want to hug her here! She made me cry.. I like this Madonna. Very inspirational and strong woman	0	0
213	If you say “All Lives Matter” you will be considered a racist. It’s absolutely ridiculous	0	3	ALM was used against the BLM movement to criticize it
214	This was so inspiring.	0	0
215	Why would you starve a child because of something as simple as who they love	0	0
216	Bisexual Unicorn here and I absolutely love this video. These kids were so darling. I feel bad for this poor man though. Why can't people stop pushing their beliefs on others? Religious people want to say that we as LGBTQ+ individuals are doing that to them but we're just being who we truly are. If anything	0	0
217	The fact is that racism points fingers in All directions. There are both good and bad people of all cultures and nationalities. To say ALL LIVES MATTER does NOT exclude African Americans. It would be a constructive peaceful way of bringing us ALL as equals. Now ALL LIVES MATTER would promote putting an end to racism once and for all.	0	3	In this context it could be thought of as hopeful, but the context of ALM being used against BLM makes it controversial.
218	Sure I wished I played with legos as a young child	0	0
219	When I told my friends that I really wanted to pursue engineering (specifically	0	1	Neutral statement without further context. Abrupt ending of sentence.
220	@Destinee I have the same aspirations as you do! I want to make my family proud and show them that women can be scientists and engineers	0	0
221	Well she was fighting for us in the mainstream media when no one was	0	0
222	I mean you can't really choose who you fall in love with... maybe she was just bi all along	0	0
223	I am a girl in 6th Grade who is interested in STEM. Whenever I tell people that	0	0
224	I feel the same way you do. I'm taking calculus which is no even a hard class but I feel so small sometimes. Only 3 girls in my class. I'm the only hispanic. Everytime I feel like giving up I watch this video and it helps a lot ;)	0	0
225	Black lives matternWhite lives matternAsian lives matternAustralian lives matter...nI mean is no one gonna stop me cus I'll be here all day!!!!nAll lives matter but so does freedom of speech	0	3	In this context it could be thought of as hopeful, but the context of ALM being used against BLM makes it controversial.
226	All lives matter white black all human life is precious.	0	3	In this context it could be thought of as hopeful, but the context of ALM being used against BLM makes it controversial.
227	All lives matter. Did God tell them something more that he didn't tell the rest of us? There are some parts of this country that they haven't seen how impoverished these areas are	0	3	In this context it could be thought of as hopeful, but the context of ALM being used against BLM makes it controversial.
228	I have always been an artiest and a writer i never wanted to be an engineer nAnd here i'm an engineer student it's my first year in college and yes i always feel this is not my place i always fail nBut this video made me so hopefull nI see myself in this video 10 years from now	0	0
229	I just want to point out that the Bible does not say that homosexuality is a sin. The passage that I’ve always seen sited has been proven to be translated incorrectly and is actually condemning pedophilia rather than homosexuality. “Men shall not lay with man” was originally meant to read as “man shall not lay with boy”. Homosexuality is never condemned. Please do research and learn about the ori…	0	0
230	@Jessica Walker saying you don't agree with the LGBT community is like saying you don't agree with black people. we don't have a choice to choose our sexuality or skin colour.	0	0
231	How can you not agree with sexuality? It's like not agreeing with the moon.	0	0
232	“Hates not going to get you anywhere in the world”	0	0
233	I'm going to start studying engineering this fall. I'm so excited!	0	0
234	When I was young I was given dolls and kitchen/cooking toys but I was more interested in creating my own miniature houses out of cardboard boxes. With it I had the option to put what I want in my houses/structures. It was much more fun to be able to create something.nnI also loved drawing and started it young but then I thought my drawings were different than my classmates' and I was too shy for …	0	0
235	This kids are amazing! I’m proud to think that I’m part of this generation that will help to fix the mistakes the previous generations had	0	0
236	No one like her! Thank you MADONNA! You inspire me in a world that is becoming so crazy! Never give up hope! NEVER	0	0
237	After watching this im convinced I have potential. I loved playing with my dads construction tools and building games. lol a bit too simple. Im watching this in 2019 because I'm studying IT in a class full of men . I don't want IT to be my end goal though but I do want the motivation to get through my first step. I have no idea where I'm gonna land lol.	0	0
238	I just wanted to send you (i.e. Debbie) a word of encouragement	0	0
239	For the people who are religious....the onlllyyy thing God wants is to respect one another and love each other....then how does this make sense its not really christianity it's the church in old times which had power over people christianity was the excuse to get people to do what they want	0	0
240	I started crying without even noticing watching this ted talk. One day I will be an engineer too	0	0
241	I feel like its a generational thing. Because I am also not seeing an obstacle Too-Hard to overcome. Stereotypes are for television. It turns out you don't need to be some outcast. But also I believe it's also because of women and influencers such as the speaker that make this possible.	0	0
242	@TheLegend27 Is Alive you can be a lesbian and a Christian..	0	0
243	Baden Jones Actually you can’t. You can choose who you date but at the end of the day you can’t choose who you’re attracted to.	0	0
244	Abdallah Shakeel like I said why is it just black lives matter it should be all lives matter so yeah it sounds racist to me mate what about Muslims Chinese or Mexican lives I’m sure we all matter as one race and that’s humans . I don’t see colour or religion I see the person the human life	0	3	In this context it could be thought of as hopeful, but the context of ALM being used against BLM makes it controversial.
245	MADONNA THE CHANGE AGENT.	0	0
246	If a person goes to war it is all lives matter. You rely on the person next to you as much as he/she is relying on you .	0	0
247	All lives do matter. Stop playing your games.	0	3	In this context it could be thought of as hopeful, but the context of ALM being used against BLM makes it controversial.
248	I love Madonna she’s a trailblazer and trendsetter thx Madonna for being unapologetically yourself and spreading love and empowering messages your so inspirational love my beautiful queen Madonna	0	0
249	Sunshine Be positive sis	0	0
250	Also “my choice is to love” is a more powerful statement than I think that child realized. That is incredibly beautiful and heartwarming to hear.	0	0
251	All lives matter there is not enough of you this will end it'll be bad for you you better be nice	0	1	Threatening language being used. ALM was used against the BLM movement to criticize it.
252	The fact that there are still places in the world that promote this kind of abuse proves that this is a sad world to live in.	0	0
253	thats true hate to the white community	2	1	Hating on a community
254	All life matter is simple. Any person from any race can end up in jail	0	3	In this context it could be thought of as hopeful, but the context of ALM being used against BLM makes it controversial.
255	@Jacob Tran Thank you so much for your support!	0	0
256	I totally agree! One of my old classmates came out as trans and pan	0	0
257	Everyone hating on the girl who disagrees with homosexuality needs to think of this from a younger person’s perspective. She’s still a child. She hasn’t matured and hasn’t been able to experience enough to formulate her own opinions yet. She may have beliefs based on how her parents raised her. Doesn’t mean she’s homophobic	0	0
258	So we're supposed to feel bad for black people?? Get outta here Sanders all lives matter where all equal.	0	3	ALM was used against the BLM movement to criticize it
259	All. Lives. Matter !!nLook up. nBochelli. The tennor!nShe kept her baby	0	3	ALM was used against the BLM movement to criticize it
260	If all lives matter then all lives should be treated the same. But it's not when you are arresting white people but killing black people so yes BLM	0	0
261	What exactly is a female perspective to begin with? As far as I know there's no evidence	0	0
262	I am a female engineer and this made me cry. This woman is awesome and inspiring. nAlmost sorry that i'm going to do economics from now on	0	0
263	luckily more and more states and countries are making it illegal	0	0
264	Do not be missed or seduced into anything that even subtly attempts to water down the absolute fact that ALL LIVES	0	3	ALM was used against the BLM movement to criticize it
265	I'll be graduating with a degree in CS engineering next December. I was always the social	0	0
266	i'm not saying racism does't exist but....when you generalize all of one race that is racism....it's black and white!nwhen we stop racism then all lives matter.	0	3	Controversial language used. In this context it seems to be promoting racism
267	There are a lot of adults that could learn from these kids. Great job parents!	0	0
268	I am a mechanical engineering major and I’m so happy to come across this video .	0	0
269	Black Lives Matter is a creation of the so called Democratic Party who is financing this movement. I still stand by my comment ALL LIVES MATTER!	0	3	ALM was used against the BLM movement to criticize it
270	Nycn lovesnCARLOS LEONn & MADONNAnDONNA CicconennDAKOTAnAPARTMENTSnnCENTRAL PARK WESTnNyc	2	2
271	ALL LIVES MATTERnALL LIVES MATTERnALL LIVES MATTERnALL LIVES MATTERnALL LIVES MATTERnALL LIVES MATTERnALL LIVES MATTERnALL LIVES MATTERnALL LIVES MATTERnIt's not controversial when you pay taxes	0	3	ALM was used against the BLM movement to criticize it
272	@mindprism You live in a very strange and little educated world. The differences exist and have to be respected both sides	0	0
273	The little boy that asked for advice on how to be a good ally friend was so sweet melted my heart! Lol	0	0
274	Black lives matter I’m a white person but are you know that black people are still good just because we have different skin color doesn’t mean people everybody’s people on this planet	0	0
275	I just want to hug her here! She made me cry.. I like this Madonna. Very inspirational and strong woman	0	0
276	Your name is literally my bio on everything. XD	0	0
277	It’s not a choice to feel attracted to someone	0	0
278	I don't fit in. But our little girls will.nThis is so beautiful and I honestly started getting emotional. This is similar to what I say.n'There may not be hope for me	0	0
279	Those protesting that ALL LIVES MATTER shouldnt be complaining about BLM protests	0	0
280	“god gave us a choice. my choice is to love” wait i’m literally crying i love him so much	0	0
281	So I like boys like sexually. Like I would marry a boy. But I kinda like girls romantically. And I'm not against romantic feelings towards the same gender. Now sexually I don't support it but I will be there for anyone who is. I support people not for what they do but for their spirit and compassion towards everyone. Pls don't come at me	0	0
282	It is absolutely a cultural issue. What a great speech	0	0
283	Exactly! I’ve thought of becoming a pilot and currently studying computer science which are both male dominated industries sometimes i cant help but also worry about how my future in these fields of career would be like would i be lonely? will i be not as as good? These talks really just gives me some sort of a motivation to move forward	0	0
284	ALL LIVES MATTER. To say anything else is ridiculous. To be equal is to be considered as a whole. There are unfair things that happen and people need to be held accountable. But to divide ourselves is not helping anything	0	3	In this context it could be thought of as hopeful, but the context of ALM being used against BLM makes it controversial.
285	Much love and best of wishes! You have an inmence amount of potential.	0	0
286	Just knowing Madonna is out there still going strong puts a smile on my face	0	0
287	if all lives matter to u guys	0	1	Neutral statement without further context
288	god gave us a choice and my choice is to lovennnThat kid is so sweet	0	0
289	I wish that people weren’t so heartless. She truly is an advocate for bettering the lives of others. I just wish that the so many lives were never taken away.	0	0
290	I'm really tired of these gender stuff	0	0
291	if everyone is too be equal the make it so everyone is equal	0	0
292	my choice is to love GIVE THIS KID SOME PRICE FOR THE BEST SENTENCE EVER	0	0
293	The message these kids are sending is amazing	0	0
294	You can do it girl!!! Keep going with your Engineering degree.	0	0
295	GOD Bless America All lives Matter. All Nations under God! AMEN	0	3	ALM was used against the BLM movement to criticize it
296	conversion therapy is literally torturing someone into having ptsd	0	0
297	Omg! I'm a first year chemical engineering student too. It's a real tough work sometimes i wonder if im making all thr right choices because college was so harsh. I thought i was doing academically fine until my grades and performance proved me wrong. I lost a lot of faith in me and everyday i dread going to uni bc i fear it'll be just the same old failures of yesterdays. But even if nothing's ma…	0	0
298	This was honestly exactly what I needed at this moment. I'm currently in my first year of mechatronic engineering	0	0
299	M a girl nd is a Computer Engineering student... nd i love d fact dat my parents always wanted me to b an engineer... i played wid those blocks as young.. nd yes India may b a developing country... bt glad my parents didnt only picture guys as an engineer...	0	0
300	Your Whole point is you don't fit in because you are a girl. nSTOP thinking about yourself as a Female engineer	0	1	Sexist comment
301	Debbie I am glad you got through it nI myself am an chemical engineering student soon I am going to be in my final year and to be honest I soooo feel like I don't fit in nmy grades aren't that good nd ofc I don't have that good spatial skills and sometimes I look at my male classmates and think are we doing the same major?? And I am soo afraid that what am I going to do after my graduation nAll o…	0	0
302	All people equal..nNo special interest..nStop the pandering..nFollow the constitution...nProsecute criminals... including bad cops	0	3	ALM was used against the BLM movement to criticize it
303	It’s just sad how people are treating black people horribly one time someone in a game called my friend that she’s Black like the wall that’s so rude I can’t stand racist people they are literally messed up	0	0
304	I could care less...my kid's lives matter...and hardly anyone else's	0	0
305	Apparently not since they're complaining about things that aren't legit complaints.	0	0
306	All lives matter because all people are created in the image of God.	0	3	ALM was used against the BLM movement to criticize it
307	she is amazing!!!!	0	0
308	@Random YouTube Account it is her right to think that though. She isn't stopping anyone from using their rights.	0	0
309	That’s why I love her she made me feel that being different is okay her music change people life’s	0	0
310	I think all lives matter instead of saying black lives matter we should all come together and be saying all lives matter Skin colors shouldn't change our feelings for each other but my opinion on George Floyd is that he didn't deserve to die but I do not think he's a hero because he was a criminal and I can't forgive him for when he held a gun up to a pregnant lady's baby hump and said he would s…	0	3	In this context it could be thought of as hopeful, but the context of ALM being used against BLM makes it controversial.
311	She had an engineering job. If you're so interested in her accomplishments look them up.	0	0
312	Thank God he say that all lives matter!!!!!!	0	3	ALM was used against the BLM movement to criticize it
313	@FortyFore Queer is anything that isn't straight. So if you think someone is not straight or cis then you say they're queer. Hope this helps	0	0
314	@Skrrrt All of us matter. All human life matters.	0	3	ALM was used against the BLM movement to criticize it
315	@aussiebear22 And women in engineering are perfectly competent. I agree	0	0
316	@akinadownhillace if you're passionate about it give a Ted talk yourself. No need to put other people down to bring something that you think is important to light. Minorities in any field should be taken seriously!	0	0
317	In third world countries males make money and feed their family mostly not women. It's the system where males are the head of a family and works for the family.	0	0
318	All life's matter.	0	3	ALM was used against the BLM movement to criticize it
319	Homosexuality is not a choice just like your race	0	0
320	Lets push more women into STEM like Elizabeth Holmes.	0	0
321	IT'S WAY PAST TIME TO END THAT RACIST BUSINESS. WE ARE ONE RACE MADE BY GOD IN IS IMAGE. RACIST NOT GOOD	0	0
322	This was extremely inspiring	0	0
323	All lives matter!! Idiocracy at its finest!!	0	3	ALM was used against the BLM movement to criticize it
324	Noah as a kid I wasn't thinking like that. I was taught to respect everyone as long as they're not hurting anyone.	0	0
325	I've seen hundreds of Madonna interviews and this is completely genuine. She is honestly emotional in this. Will always love her for fighting for my community and others who have been marginalised.	0	0
326	I am so grateful to live in an environment where I rarely get to hear things like engineering is not for women. When I was little	0	0
327	“God gave us a choice	0	1	Neutral opinion
328	Women have a much easier time getting engineering jobs as people are specifically trying to hire them	0	0
329	Why can't you say all lives matter but you can say black lives matter that's a bit selfish	0	3	ALM was used against the BLM movement to criticize it
330	@Nhi Tran aah it's never too late uh can if u really want to..nnYeh mat socho zindagi me kya hoga kuch nhi hoga to tajurba hoga (i.e do not think what will happen in life	2	2
331	Madonna if only you realised how much you affected my life through your music and passion ... you have brought me so many happy moments and for countless others	0	0
332	i'm a woman.nThis is all nice and dardy	0	0
333	I'm lost but surely all lives matter.	0	3	ALM was used against the BLM movement to criticize it
334	He is a gift from God	0	0
335	Inclusion will only work when people show up ready to include themselves instead of sitting around	0	0
336	I just wanted to tear up when Debbie spoke about creating engineering toys for little girls to help change the spatial learning they have. People like her are the reason why I still want to pursue in engineering.	0	0
337	Jesus died for all of us. White black	0	0
338	Clearly this virus has a side effect of stupid causing people to act out in an aggressive and disgraceful manner	0	0
339	It should never be controversial to say All Lives Matter. I have several good Black & Asian friends who treat me with the same respect as I do for them. Regardless of what race you are	0	0
340	Lives Matter. If you have to have a color before those two words you're a racist.	0	0
341	i feel sorry for him. but he needs to stand up and say ALL LIVES MATTER	0	3	ALM was used against the BLM movement to criticize it
342	Your family sounds amazing! I hope your dreams come true!	0	0
343	I have nothing against gay people	0	0
344	I am a female engineernhttp	0	1	Neutral comment
345	Obviously all lives matter; but the phrasing isn't 'black lives matter more than any other' it isn't claiming superiority	0	0
346	@hana bakkoush she was obviously raised differently than the other kids. I was raised extremely conservative and I considered myself hardcore conservative too and stayed that way until I met people that had different beliefs than my own. That wasn't until I was about 15. For all we know she's only just now really being exposed to these things. She may change her mind on homosexuality	0	0
347	i came out at 14. Im still not completely comfortable with telling everyone because they arent very understanding and mean. You can come out at any age.	0	0
348	I was inspired as a women to believe in myself and be a strong independent women. I was raised with no encouragement and to be powerless. She rocks 🤙 OMG nearly cried to her comment at the end ‘never give up’	0	0
349	It became illegal in Hawaii (50th State) in May 2018	0	1	Without further context this remains neutral
350	Most female engineers I work with are not native USA. Austrian	0	1	Explicitly neutral comment
351	Poor guy was straight up abused as a kid but he pushed through it because he loves himself that much.	0	0
352	I am cryingso much love to Marcus and everyone LGBTQ	0	0
353	@NOXISUM you really couldn't have been more racist with that comment. I'm African American and I support the all lives matter statement. You sit there and say white people make it about them. Uhhh no it's not just white people its every other non black race and they're not trying to bash this protest. But why can't it just be about police brutality and racism in general. Black people and white pe…	0	0
354	The lives of every human that have been conceived matter.	0	0
355	@TheCounterpointer I'm not your damn Google. To say there isn't discrimination is simply delusional. Gtfo.	0	0
356	U musnt force someone to change just let them no the consequences that their choice will bring and leave it at that	0	0
357	It is actually one of the main reasons - a lot of research has been done on the subject. An absence of social influences to go into STEM fields is one of the biggest problems. The reason why they drop out after they get to school is again due to the social influences - this time negative from their peers. Also	0	0
358	I'm Christian and I don't judge anyone on anything. My opinion doesn't matter. God's opinion is the one that matters at the end of the day. I love people for being people no matter what. Just bc ur christian	0	0
359	@WerebatnI am not sure why I stated that - maybe I was thinking of another comment. Maybe it was because you say that she is not an engineer. I don't believe that you HAVE to be an engineer to encourage females to go into the field - anyone can do it. So	0	0
360	Shout-out to Annie for being so real. Despite her beliefs	0	0
361	We're all equal right?	0	0
362	For people who were judging Annie (and I read that she has come out now but I'm not sure if that's true) I was the same way when I was younger because I grew up in a religious family. But I was really really confused and hated myself because I couldn't understand why God would hate me if I like girls. Which for me made me try to prove even more that I didn't like girls at all. I finally left the …	0	0
363	(If they’re alive) someone should torture the people who done the therapy by forcing them to be Jewish and beat them with the Torah	0	1	Hateful language used.
364	what does it matter if your female or male just do your job	0	0
365	@Dus Bus This is racist movement.	2	1	Neutral comment without further context on what movement is being talked about
366	I don't think there's anything wrong with personally disagreeing with homosexuality as long as you still respect the LGBTQ community and aren't nasty to anyone because of their sexuality	0	0
367	@***** That just proves your willfull ignorance	0	0
368	Saying 'All Lives Matter' means all people in this whole world matter and that's because God made all of them. Nothing to do with skin color.	0	3	In this context it could be thought of as hopeful, but the context of ALM being used against BLM makes it controversial.
369	Racism needs to stop.	0	0
370	@colorbar.s she literally came out as bisexual	0	0
371	This is awesome. Very inspiring	0	0
372	I'm 14 and in our school we have a STEM program the fact that I'm a girl never discouraged me from applying. But I know that it discourages other girls as there are 22 kids in the program and only 6 of us are girls.	0	0
373	I choose to equalise. Everyone has no more or less rights than anyone else. You earn love and respect	0	0
374	I’d agree if she didn’t say that homosexuality was a sin. But she did.	0	0
375	I just hate how when people talk about conversion therapy it makes others think that Christianity is bad.	0	0
376	I don’t agree with conversion therapy	0	0
377	@ImAlfie Just leave her alone. She wouldn't want to look at the comment finding people asking about her sexuality because that's weird. Its none of our business.	0	0
378	I think it's is. It's literally a form of torture.	0	0
379	« My choice is to love » and live life	0	0
380	Maybe let’s stop assuming wether Annie will come out or not. Kinda unfair to assume wether someone is LGBT based on the way someone looks.	0	0
381	This made me cry. I'm Hispanic	0	0
382	I get so emotional watching this. I'm crying right now! We are all equal!!!	0	0
383	I am a male engineer and I don't feel like I fit in in engineering. If you are a girl and you have the desire to become an engineer	0	1	Neutral opinion, and incomplete context
384	This is so inspiring! MD/ PhD in engineering is my end goal! I have too many ideas and realized I need engineering training to do the research. My brother is a petroleum engineer. I'm at community college starting my journey to wherever school I end up! My credits in Psychology I have 119 but too old to transfer but working in psychiatric field and mental health has given me the vision I have now	0	0
385	I love watching doctor who!' Me too sis! What a lovely girl	0	0
386	9.20 To never give hope - to never give up ! She said it with conviction .	0	0
387	ETERNAL INSPIRATION nSHE SAVE MY LIFE	0	0
388	@S. Tagerius I was really impressed with your ability to communicate the horrific implications of conversion therapy and support of the LGBT+ community.. but completely shocked and disappointed that you are advocating that abortion is killing a baby. Why is it that you think LGBT+ individuals are worthy of bodily autonomy but women aren't worthy of having autonomy over their bodies??	0	0
389	Some of the black lives matter people are doing things correctly to protect their people but there are some that are destructive against innocent people and bad people too.When someone says black lives matter it is rude to say all lives matter because the purpose of this movement is black protection for their people and it’s rude to bring other lives to erase its main purpose.Its like saying “My …	0	0
390	“That is uHH really mean!” She is such a smart kid and has a great mind set 🥰	0	0
391	STOP USING RELIGION TO HATE ON PEOPLE IT’S STUPID AND HARSH	0	0
392	Good. Keep that mentality and don't be a victim	0	0
393	I love that she uses her platform to shed light on the darkness... very brave	0	0
394	Let’s talk about the fact that we are in the middle of a serious pandemic and people are dying left and right. That’s where our focus should be right now! Not about who’s life matters and whose doesn’t! Stop the madness please!!!!	0	0
395	Alll on the movement lives matter are criminals	0	1	Neutral. Seems to be against ALM, but not hopeful language.
396	I am a male who choose to change from being an engineer to being a early childhood teacher when I turned 50. Everyday I tell all the children I care for that they are engineers	0	0
397	You can’t gain respect without giving it first. I myself am Christian and just hate when other Christians disrespect what others chose to believe in/do and feel like they are entitled to get that respect back...	0	0
398	If ur lgbt and ur parents are like his I urge you to not come out until you are old enough so you know a safe place to go or old enough to leave	0	0
399	Never give up never think you are less because of a choice you make you are you and that will always be the same.	0	0
400	All Lives Matter	0	3	ALM was used against the BLM movement to criticize it
401	That man is so incredibly strong...i was moved. Thanks	0	0
402	“My choice is to love” I literally started to cry	0	0
403	Thank you so much for inspiring me . .. I've always been feeling like I've made the wrong decision by choosing to do engineering....I always feel like I can't do it .. I'm just surviving .. I just wanted to finish and get out . And do something better with my life . But now I get ... I'm back.. thank you so much.... I'm a 400l mechanical engineering student from the university of Lagos	0	0
404	I also agree “ All lives matter “ Yes	0	3	ALM was used against the BLM movement to criticize it
405	I'm 14 and in my school I'm in a special class for STEM students. We have 22 students in the class and 6 of us are girls. And yes the boys do think that they are so much better than us.	0	0
406	This video is so inspiring! I can't wait to start engineering in university in September	0	0
407	Yep that was exactly what I would do as a teen. When I was around my parents I was the most stereotypical straight person but around my friends I was full on queer. It makes sense if she is.	0	0
408	I am so inspired by you! Thank you for creating an amazing product for amazing girls and thank you for sharing your story! You are a beautiful speaker and a beautiful person!!!	0	0
409	There is no need to shame this kid for how she believes as long as she isnt hurting anyone then no need to shame or make her feel as if she is in the wrong	0	0
410	Yesterday was the day I just received my results and I were accepted to the bigger institute of engineering of my country nThan here started the critics of my family and teachers « what ? You’re girl ! Go and study medical science and leave engineering for boys ! You’re crazy ! You just lost your good grades for engineering while you could study biology of become a doctor ? Why !? » this speech h…	0	0
411	@melancholicmusicboxnnnI don't agree in hire people just because they are men	0	0
412	The girl with the red sweater handled that conversation SO WELL. I am LGBTQ+ and I wouldn’t have been offended having a conversation with her. She was nice and still respected the guy	0	0
413	There's something fascinating to me about a woman who's correct	0	1	Neutral opinion. "Fascinating" can be used for both hopeful and hateful contexts. Further context is required to judge better
414	I hope that the money that goes to this video will be donated in some way to the families and people that need it right right.	0	0
415	All lives mater	0	3	ALM was used against the BLM movement to criticize it
416	@Adele TA Good for you! I hope those other girls will realize that their purpose in STEM is not to hang out with other girls but to actually do something with STEM.	0	0
417	as much as I don't really agree with annie she was really polite about it and respectful	0	0
418	I agree. She seems to be in denial. Being homosexual is not a choice. I did not choose to be heterosexual	0	0
419	This was so inspiring	0	0
420	I think Canada has a pretty good Muslim community for the most part. At least if Islam reformed like Canadian Muslims it probably would be fine I think. But I still think almost all religion is cancer.	0	1	Having a personlised opinion on religion is neutral. This is neither hopeful nor anti-hopeful.
421	@westrim​​ Then don't represent it as a justification for sexism if you can't prove your claims. I have faced sexism as well but I don't go around bitching about it.nnSexism towards Men-nn1. Only we have to sign for the draft.nn2. Only Men can be charged for domestic violence even if the aggressor is a women.nn3. Men receive 70% longer sentence then women for the same crime.nn4. Women get special…	0	0
422	All lives matters!!!! God created Man & Woman	0	3	ALM was used against the BLM movement to criticize it
423	Crystal needs to rule THE WHOLE WORLD she is so so mature. I wanna conatulate her parents.	0	0
424	of course all lives matter... Including of course black lives...	0	3	In this context it could be thought of as hopeful, but the context of ALM being used against BLM makes it controversial.
425	I believe that all lives matter	0	0
426	It's so beautiful that those children will have understanding for everything and everyone and won't be judgemental as the rest of the society. Love this channel	0	0
427	Thank You For All YOU'VE Done for Our Community.	0	0
428	I am a Catholic and the thought of conversion therapy on anybody disgusts me. I know that the Jesus I serve is NOT the same one that this person unfortunately had to experience. God is love and the way he was treated was NOT love so NOT God. I like what that little boy said. God is love and I chose to love.	0	0
429	She has never been afraid to say these are my friends and I love them.nThis was well before it was fashionable to embrace the gays.nShe and Elizabeth Taylor were throwing millions of dollars towards AIDS research in the beginning	0	0
430	I have a friend who chose to be a lesbian because of negative experiences she has had with men. Now she is happily living with her girlfriend - doesn't miss being with a man at all.nnI have heard for others it is not a choice and I think that that's okay. I don't understand the hate against LGBTQQIAAP.	0	0
431	All lives matter. Not only black	0	3	ALM was used against the BLM movement to criticize it
432	Btw it is not just in Engineering but any field where men dominate. I even see that inability sometimes in sports because of the type environment girls get at younger age. i love ya	0	0
433	S. Tagerius thank you for using your time up to try and help some people learn about the abuse people suffer under conversion therapy and how ineffective it is.	0	0
434	kris c where in the Bible does it say that homosexuality is a sin? The passage that I’ve always seen sited has been proven to be translated incorrectly and is actually condemning pedophilia rather than homosexuality. “Man shall not lay with man” was originally meant to read as “man shall not lay with boy”. Homosexuality is never condemned. Please do research and learn about the origins of the boo…	0	0
435	I'm an LGBTQ kid! I don't know if I'm bi or lesbian.	0	0
436	I was that girl who would rather play with the legos and Lincoln logs. Thank you for the inspiring speech!	0	0
437	Its funny mire peaceful protests happened more than the violent ones but they showed the violent ones more and bow people think thats the only way they did it and it wasnt.yes some people took advantage of it and looted others just wanted justice so they marched.	0	0
438	I don't think Trump was trying to be anti semetic	0	1	Political opinion. Neutral without further context.
439	Where does this impression come from that LEGO is a boy's toy? It is completely gender neutral	0	0
440	Every life matters...human	0	3	In this context it could be thought of as hopeful, but the context of ALM being used against BLM makes it controversial.
441	crystal has restored my faith in humanity	0	0
442	You are such an inspiration. I would buy this toy for my daughters too.	0	0
443	I hope you are getting support	0	0
444	All life is a gift from God	0	0
445	yamiGAJw queer is basically an umbrella term for someone who is not straight or not cis (cis means someone who identifies with the gender they were assigned at birth	0	0
446	Obviously all lives matter the movement is saying that their lives AlSO matter. When black people are being targeted and their trying to state that they’re black lives matter	0	3	In this context it could be thought of as hopeful, but the context of ALM being used against BLM makes it controversial.
447	I don’t think homosexuality is something you can or cannot agree with. It’s like saying “I don’t agree with oxygen”. It’s just a thing that exists in the world. You can’t deny it or get rid of it. It’s not good or bad	0	0
448	Thats right all lives do matter period and if you think that it's not then shame on you ALL LIFE MATTERS PERIOD!!!!!! ONE LOVE TO ALL HUMANS	0	3	In this context it could be thought of as hopeful, but the context of ALM being used against BLM makes it controversial.
449	My parents were absolutely against me majoring in the humanities. They encouraged me to go into engineering. I'm glad I did. Gender wasn't even in the question.	0	0
450	In india women engineer is very common like 35+%. nFunny thing is in my class (Computer Engineering) teachers use to give more marks to girls and top 3 students are girls. But during placement phase only guys could make into top 3 companies	0	0
451	Madonna in her songs and her voice have always been there as a way to comfort me	0	0
452	All lives matter. What the police done to George Floyd isnt right	0	0
453	I'm so surprised that people think this is just an American issue. There are racial issues everywhere and politics has nothing to do with it at ALL	0	0
454	I know. You should treat people as people and not colors	0	0
455	Hiho Kids you guys are doing amazing work. Once again I'm so happy and grateful that you guys are expressing what goes around and coming into this world. Kids need to know what goes around and understand what LGBTQ COMMUNITY and people who comes out and share what they went through their lives. Such a awesome Message that you all are showing.	0	0
456	So surviving from mental abuse isn't considered a survivor? They wanted to strip his identity from him. Maybe think before you leave a comment.	0	0
457	I spent 4 years in a highschool with 4 majors science	0	0
458	‘I don’t agree with homosexuality’ is like saying to a blind person ‘I don’t agree with blindness’	0	0
459	“god gave us a choice... my choice is to love”ni cried	0	0
460	Born to be a star an icon. She has done so much for the LGBTQ community. I'm so horrified by the hate she gets because of her age	0	0
461	I personally don't agree with alot of what is being said about black lives matter.it should be all lives matter. A lot of people are starting riots and uprising against each other. That makes these people look just as bad as some police who are wrong and. Do wrong if everyone prays and forgives we as a nation might still have a chance.	0	3	In this context it could be thought of as hopeful, but the context of ALM being used against BLM makes it controversial.
462	The only thing that puts doubt in girls minds are videos like this. to whom ever is making stuff life this. nnGet bent! And i hope to the atheist God that my daughter grows up and understands that all this is just bullshit and that her fate is in her own hands	0	0
463	All you need to do is let girls choose their own subjects. Don't make other girls have to choose what you want them too. Give them their own options. In fact I've never heard anyone tell girls that they can't choose engineering or science. Let them choose what they enjoy.	0	0
464	That boy who wanted advice on how to be there for his friend was so sweet. I hope he never changes and stays just as sweet and kind when he grows up	0	0
465	The things she says are truly inspiring. It really feels like all of the engineering world has been constructed by old white men and is targeted towards old white men	0	0
466	I’ve read a fanfic about two guys that were sent to a straight camp and it was horrible like how is that legal wtf	0	0
467	The message is ALL LIVES MATTER. All or none at all	0	3	ALM was used against the BLM movement to criticize it
468	I am black too and completely agree we are all humans and every single life is important not one is more more important than the other otherwise that is just racist and making the issue worse not better	0	0
469	All lives matter . But police department needs to screen there officers on the background & take it from there .	0	3	ALM was used against the BLM movement to criticize it
470	god gave us a choice my choice is to love	0	0
471	You can make all the covid-19 jokes you want. And I dont disagree. But something amazing is happening. We are saying names of the ones we've lost. We are dismantling police. We are screaming ACAB. Cops are putting down their badges and marching with protesters. Rubber bullets	2	0	Borderline uplifting
472	I'm pursuing civil engineering and most of my classmates are boys tho	0	0
473	God bless that sheriff!! All Lives Matter!!	0	3	ALM was used against the BLM movement to criticize it
474	Jessica Walker it's not a lifestyle. it's not a way of life. it's something you're born with. it's not a choice. it's literally the same as racism.	0	0
475	i am a girl when i told my family about me doing engineering my brother saud to me get over your self girls don't do engineering .. well it kind broke my heart i don't know what to do now	0	0
476	The little kid that said that God gave him a choice and he chose to love is the greatest kid i've ever seen. There's so much wrong portrayal of what christianity is on the media that is refreshing to see someone who actually gets the concept. And i also love that Annie regardless of her point of view respected the survivor's opinion and got to an agreement. Ilove them all please protect them	0	0
477	Great! Slave traders and racists shouldn't be admired in this century	0	0
478	+Carol Danvers Physically they are. VERY different. Sorry but nature is real. I do agree though that engineering has nothing to do with weather it's men or women	0	0
479	When you say all lives matter. You're including everyone. They don't want to include everyone.	0	3	ALM was used against the BLM movement to criticize it
480	Women make their own decision not to go into theses kinds of majors they tend to chose more safe majors.nAnd than they blame patriarchy and sexism and oppression when it's all their personal choice. nWomen must become more assertive and demanding in these things. If we want it will GET it. We have every right and freedom to do so	0	0
481	Randomgirlwhosings0804 what is there for you to agree on when it comes to sexuality? Its their sexuality. You can’t change it lol.	0	0
482	I’m Catholic as well and the way some people abuse the bible in order to hurt others is abhorrent. I do not agree with conversion therapy at all.	0	0
483	Is this more of a problem in the west ? Because if you visit other countries there are many female engineers and science majors	0	0
484	This is great! As a middle school science teacher I know and see how our culture does not seem to support females in science. I've started engineering projects this year and they have been well received by all (boys and girls).nnIn reply to the comment about men not being in elementary Ed. I don't see men as not being encouraged to be teachers. There is no culture saying men aren't smart enough t…	0	0
485	ELM - Every life matters!	0	3	ALM or ELM was used against the BLM movement to criticize it
486	jzizzles. I’m Christian and my family loves all people.	0	0
487	You inspired me to keep moving on my engineering program. You are amazing thanks alot!	0	0
488	She was being respectful though. I don't see how someone can't agree with something you're born with but if they're being nice that's all that matters	0	0
489	“God gave us a choice. My choice is to love.” Omgosh.	0	0
490	yeah because he was being abused and starved at 14.... that's illegal	0	0
491	even if shes talkin for women i as a male was really motivated by her. I always wanted to be an engineer but i lack of confidence that maybe im not smart enough(or not born smart enough) but its more like how bad you want it.	0	0
492	Gays need help	0	1	Hateful against gays
493	I'm studying Mechanical Engineering and this has boosted up my mood 6 years later!	0	0
494	All Lives Matter	0	3	ALM was used against the BLM movement to criticize it
495	@kuggacourage gx np... We are all human	0	0
496	All lives matter #TonyTimpa	0	3	ALM was used against the BLM movement to criticize it
497	God is love and god loves every good person no matters what	0	0
498	Sunshine littlephilly Obviously you do my understand sexuality. It is not a choice and you cannot just change it. But I do appreciate that you would still treat them as a human and be kind to them.	0	0
499	Back in the old days there were no pink and blue aisles. In the 80s in my country there were few toys to choose from so the parents got what they could. Me and my sisters had a bucket full of building blocks a would play a lot creating adventures and stuff. I didn't like dolls or barbies because the joints could not be bent. We also borrowed our father's saw and files and we created stuff from tw…	0	0
500	@Harris Cobb Your statement is only partially correct. Whilst it is illegal to hold an adult against their will with the intent to convert them	0	1	Does not sound hopeful with the incomplete context
501	Here's our demands. Stop killing us for no good reason. We don't want to die	0	0
502	CASA. LA. FEMMEnWesT. ViLLAGEn2008nNyc	2	2
503	“that would just be uh pure mean” so cute	0	0
504	@Paige’s Prayer Corner nI understand and agree 100% whith what you're saying and I'm also a proud Christian.nI was just saying that the people the commenter asked about must have some power if the higher authorities are covering up their mistakes instead of taking the correct actions against them.nI listen to and admire alot of priests and what they say and how they live.nMy point was that alot o…	0	0
505	Candra Rakhmasari nYES!!! using religion to abuse someone and take away their rites goes against the golden rule. Do onto others as you want done to you. It goes against peace when treating people with hate. It makes me so mad when people use religion to abuse other people	0	0
506	In my Civil Engineering classes (Brazil ) fifty percent are woman	0	0
507	We are all equal in the eyes of our Lord God and Lord Jesus. ALL LIVES MATTER!	0	3	ALM was used against the BLM movement to criticize it
508	Over the years I have found the only thing as good as a female engineer is another female engineer. I wish I would have had more of a pool to hire from. I have never regretted hiring them. You go Debbie! Send the world more.	0	0
509	Black Lives Matter is a statement of DIVISION - ALL LIVES MATTER why because this not about skin is not the problem POVERTY is the problem and JOB and both these problem affects Black and Whites. By the way check the stats more WHITE men die in police custody than BLACK me. ALL LIVES MATTER full stop.	0	3	In this context it could be thought of as hopeful, but the context of ALM being used against BLM makes it controversial.
510	i really wish black loves matter was originally called all lives matter or something else.. at the end of the day the american constitution says all lives are equal regardless of race	0	3	ALM was used against the BLM movement to criticize it
511	God gave us all the gift of life.	0	0
512	One of my fav legends! She is a true spirit for change	0	0
513	I want to be a computer engeneer on sha Allah!!!!	0	0
514	I graduated as an electronics engineer in the 1970s when it was only 2% women	0	0
515	I think it took her a while to realize that she can approach things in a different way not the way that she went about it	0	0
516	...mdna...you're a beacon of hope in a dark unpredictable world....thank you for standing up and continuing the fight for change...i love you	0	0
517	DailyUpdate no but still social distancing and wearing mask should be practiced while protesting. That’s all I am asking. I know time is the essence and now is the time to stand up and protest to try and change racism. But pls everyone stay safe	0	0
518	All lives matter implies that all lives matter. It doesn't mean to say that a certain group of peoples lives don't matter. It may also include groups that don't face any oppression and groups that do. It also implies that the oppressed groups should be equal to the non-oppressed group	0	3	In this context it could be thought of as hopeful, but the context of ALM being used against BLM makes it controversial.
519	Yasss well god told us to love every one so I will love them wow actually started to cry so powerful I wish ever one thought that way	0	0
520	What an inspiring talk - not just for engineers or aspiring engineers	0	0
521	All lives matter. John 3	0	3	ALM was used against the BLM movement to criticize it
522	Im here to break all kinds of stereotypes! I'm a freshman engineer major!!! JESUS IS GOOD!	0	0
523	“My choice is to love” my heart I love him bro	0	0
524	I’m a Christian and I don’t care if you are homosexual. As long as you don’t harm anybody you do whatever you want.	0	0
525	All Lives Matter .. love thy neighbor	0	3	ALM was used against the BLM movement to criticize it
526	I am a girl/woman and an electrical engineer. nWhen I was a little girl I always wanted to have the lego stuff of my big brother and i loved to fight with selfe made weapons... but my mother always wanted a cute little girl which will get an artist or sth like this	0	0
527	I'm a Christian and I don't know how someone who can claim to love Jesus do these things to a person. This is unjust and cruel. We are told to love everyone equally and I can't stand for this! I'm so sorry people actually had to go through this. Have a wonderful day and stay strong you beautiful person. Don't let anyone tell you who you can and can't be.	0	0
528	B stands for Brave nL stands for LoyalnA stands for AwsomenC stands for Courageous nK stands for Kind nnDon't hate on people for the colour of their skin	0	0
529	So inspiring I swear ... The same problem is faced in India too..nGuys always look down upon girls	0	0
530	I am 17 guy and I from Edinburgh. I am studying engineering drawing there is 3 of us studying year 1 uni level 2 guys 1 girl. we are the first at that level in our school for 10 years next year there will be another 5 people doing this level 2 guys 3 girls.	0	0
531	Super Taco GAMING that is the point. The police obviously shouldn’t have killed him. it doesn’t necessarily mean that he killed him because his race.	0	0
532	Conversion therapy should be illegal.	0	0
533	This whole “conversion therapy” thing is messed up. It makes all Christians look like terrible people even though God says to love everyone	0	0
534	@Molly Rebekah Saying you dont agree with homosexuality is like saying you dont agree with being black. It's not a choice and it doesnt hurt anyone. And you telling someone that they are wrong for who they love (which they cant change) is just as bad as what those people did to this man as a child.	0	0
535	All lives matter! Stop the hate people!!! Hate breeds Hate. Marching around shouting B L M is all fine and dandy when its peaceful and such but there are too many folks that are racist as shit going along with the black lives matter marches. We need to be kind	0	3	In this context it could be thought of as hopeful, but the context of ALM being used against BLM makes it controversial.
536	ALL LIVES DO MATTER PERIOD DOES NOT MATTER WAT COLOR U ARE PERUOD !!!!!!!!	0	3	ALM was used against the BLM movement to criticize it
537	Madonna is amazing she really is she fights for what she believes in and that awesome. I've loved her since I was really young	0	0
538	God gave us choice; my choice is to love.nnCue me sobbing.... what a freaking wonderful child.	0	0
539	All Lives Matter. We are all the same inside of our bodies. Ask God. He Created us.	0	3	ALM was used against the BLM movement to criticize it
540	My parents gave my brother all the next latest and greatest electronics that were coming out during early 2000s and they use to give me all the pretty dolls and role play toys typical for girls. nThey thought he was going to be a programmer cuz he played a lot of computer games but he decided to major in art and I majored in computer science lol! I didn't even know I liked programming until I too…	0	0
541	All lives matter (except the ones that want to divide us)	0	3	ALM was used against the BLM movement to criticize it
542	Racism is the biggest pandemic	0	0
543	All lives matter... Anything else is literally creating division.	0	3	ALM was used against the BLM movement to criticize it
544	Conversion Therapy aka Abuse. Segregation isn’t a thing in America anymore. We have already accepted that we’re all equal and that we don’t have to be segregated	0	0
545	U are such an inspiration	0	0
546	There are lots of people that get depression and comit suicide after conversion therapy	0	0
547	Y’all lives matter. There	0	0
548	@Darzo Xx You know what? This response is kinda cool. I am not going to shame you for what for you believe because you have your own history and experience. People are trying to engage and we can respectfully disagree. Having respectful discussions is the point. I think people want to talk rather than argue to prove they are right at this point. The slogan is supposed to be divisive to get people…	0	0
549	She will be forever and ever my everything and more	0	0
550	people who say that coming out is useless should watch this video.	0	0
551	Is he a teacher? Because he explains concepts so well to children. What a wonderful person	0	0
552	Y’all really need to let go. Yes we know all lives matter. That’s a given. But the reason why people have to say black lives matter “too” is because black lives have it mattered since the 1800s!!! We know like white lives matter that has been proven that white lives matter over all of her lives in America time and time and time and time and time and time and time and time and time and time again.…	0	0
553	God Bless all the Police risking their lives everyday protecting our communities and restoring order.	0	0
554	this is truly inspirational.	0	0
555	I saw people saying that engineering is not a thing capable for girls. From that day decided to be an engineer and shut those people's mouths.	0	0
556	Yes. All the color matters	0	3	ALM related statements were used against the BLM movement to criticize it
557	When my mom suggested to me to become a civil engineer I pictured myself this strong smart woman in suits designing beautiful constructions visiting the site and giving instructions to the workers. It sounded pretty amazing as a girl who will be doing such things. And right now I'm on the path to become an engineer but sometimes I really do feel lonely and discouraged though. These kind of talks …	0	0
558	“God gave us a choice and my choice is to love” WOW this kid gets it	0	0
559	@Emilia they mean that the fact that girls don't normally choose STEM fields is because we are socialized to be interested in other stuff. Which is a bad thing because when someone does break the norm	0	0
560	It's racist to say only one race matters all.races matter all life's matter	0	3	ALM related statements were used against the BLM movement to criticize it
561	The truth is All lives matter	0	3	ALM related statements were used against the BLM movement to criticize it
562	She doesn't sound like a victim to me. She sounds like an engineer. I tried this. It didn't work so I tried that. I figured out this. Then I tried that. It worked.	0	0
563	All lives matter includes black lives	0	3	ALM related statements were used against the BLM movement to criticize it
564	everyone talking about the girlnshe was clearly protecting herself... she came out bi recently	0	0
565	Guess how I came out of the closet! Well I didn’t have to! My ex best friend did it for me~! And guess what she did? She was the first person I told	0	1	Doesn't seem encouraging. Slightly inclined towards supporting the LGBTQ community, but mostly looks like a story.
566	Star Lord I honestly think that education system has a lot to do with it. If I am not mistaken in US you can choose your classes	0	1	Seems like a personal opinion. Since there is no context available, cannot be classified as a hopeful or encouraging statement.
567	i can relate with her experience. being minority in MecEng Major is really hard. but	0	0
568	The little asian girl was asking such valid and deep questions for her age!! So moving	0	0
569	If you are going through something similar - know that you’re not alone!! 🧡nThere are churches that are ONA “Open and Affirming of all lgbtq+ people. You are loved	0	0
570	I'm sorry to say this but I don't think that she can do very much in order to inspire girls to become engineers with her product as it still heavily relies on the parents buying them. I believe that the real issue isn't getting girls interested in engineering but rather to prevent parents from pushing their kids into stereotypical roles because I think that the families that buy Miss Sterling's b…	0	0
571	I don’t really understand the idea of people assuming people’s sexuality based on their appearance. Like we are fighting against stereotypes but still are using stereotypes.	0	0
572	All lives matter to Jesus...I will side with the Lord.	0	3	Seems like an opposing comment to 'Black Lives Matter' and isn't actually intended to be hope speech.
573	What about the rest of the world . all lives matter! we are all human! Or do you you all just want attention	0	3	Seems like an opposing comment to 'Black Lives Matter' and isn't actually intended to be hope speech.
574	Just realize that woman are treated differently in these fields. You are given a lot more slack for your fuckups than your male counterparts.	0	3	This statement tries to highlight the backlash that women face in the industry, but doesn't seem like a hopeful statement.
575	A young lad was stabbed by a black guy in a racially motivated attack in Ireland. The video is circulating on twitter. Its not nice to watch.	0	1	Seems like facts or description of an event. Nothing hopeful or encouraging is being spoken in this statement.
576	+Jane Gerrard Thanks for the excellent comments. I think that explains the experience of many women working in a variety of disciplines. TBC	0	0
577	ALL LIVES MATTRESS.. WHITE BLACK . RED. BROWN. YELLOW.nHELL EVEN WORMS .. L. M.nGET THE FCK OVER IT....WE ALL ARE EQUAL.... BITCOIN ABOUT B. S.	0	3	Seems like an opposing comment to 'Black Lives Matter' and isn't actually intended to be hope speech.
578	I am a teenage girl watching this years after this video was published and found it really inspiring.	0	0
579	I’m a girl and I’m planning to study environmental engineering when I’ll be in university	0	1	Plain statement, nothing hopeful
580	Fox News is pure Garbage!	2	1	Personal opinion
581	Toys should be made to build more skills like this	0	1	Just a statement, doesn't classify as a hopeful statement without too much context.
582	Inspiring talk! I'm glad I found this video	0	0
583	Idk if. I'm wierd but I never really played with dolls....I just loved playing with cars	0	1	Personal story, nothing hopeful.
584	All lives matter. That is not a racist statement. If you think it is then you are ignorant.	0	3	Seems like an opposing comment to 'Black Lives Matter' and isn't actually intended to be hope speech.
585	I'm currently a sophomore doing ME and Mathematics. This video really helped! Wish me luck on my finals next week.	0	0
586	@TheCounterpointer Women today so physical labour a lot more od they can do it today they could've done it back then as well.THERE'S NO excuse for not allowing women to vote or get education and sell them like property you fucking moron	0	0
587	Im currently in college pursuing an electrical engineering degree. I have the same feelings. I am constantly doubting my self. It always seems like everyone else in class is understanding except me. I try so hard and barely make it. I wonder if I'm just setting my self up for failure. Like what am I doing to myself? Is this worth it in the end? Will i make it to the end? This video really touched…	0	0
588	I look to a day when people will not be judged by the color of their skin	0	0
589	Blake Eloise I dont hate anyone actually	0	0
590	I'm sorry but u can't fight racism with racism. blacks can be as racist as whites. all racism is wrong doesnt matter who the race is	0	3
591	I'm lesbian and one thing that bothers me is when supporters of LGBTQ get all mad when some people dont agree with us and call that homophobic. Being homophobic is way different then not agreeing with LGBTQ. Like the majority of these kids arent necessarily supporters and dont necessarily agree with it	0	0
592	Y’all need to stop this whole she’s young she’ll come out of the closet eventually sounds a lot like every conversation an lgbt survivor has had	0	0
593	All lives matter black white brown whatever race you are you matter thats all	0	3	Seems like an opposing comment to 'Black Lives Matter' and isn't actually intended to be hope speech.
594	i am bi BUT i did not wake up one morning oh lemme kiss a guy and decided i wanted to date guys people that says homosexuality is a choice is dumb	0	0
595	i got chills throughout the video. I'm so happy to be able to come into the field with women and as an inspiring aerospace engineer	0	0
596	I played this in my high school engineering (PLTW) class today. I told a young lady that her story would never be as inspirational as yours--- I told her to make no mistake; have no misunderstanding--- YOU BELONG HERE. I hope she never has to hear what you heard in higher education.	0	0
597	Sasha Dumse god made us to be ourselves	0	0
598	I'm a Christian and I believe in the Bible but what the heck that therapy sounds straight up cruel. I'm sorry he had to go through that.	0	0
599	This was such a heartfelt Ted talk & really hit home for me as an industrial engineer in my senior year. Especially personally this week because I have dealt my whole college life with doubters and disbelievers in my intelligence and diligence & to realize I'm not alone in feeling alone was very awakening and motivating. I'm so inspired to inspire young females to dare to challenge societal press…	0	0
600	im sitting here watching this and when he says 'god gave us a choice my choice is to love' im trying not to cry bc my family doesn know yet i told my mom but not really anybody else in my family	0	0
601	This made me sad that people in the LGBTQ+ community has to suffer like that	0	0
602	All lives matter we are all gods children	0	3	Seems like an opposing comment to 'Black Lives Matter' and isn't actually intended to be hope speech.
603	I teared up watching this. I think Debbie's story is just so incredibly inspirational. She is an incredible role model not only to the little girls she reaches through GoldieBlox	0	0
604	I'm Biesexual and I didn't even have to come out my mom just figured it out lolnnnnnI feel bad for him though....sad...	0	1	Just a statement, nothing hopeful or encouraging.
605	No.nnALL Lives Matter. (copy and paste this)	0	3	Seems like an opposing comment to 'Black Lives Matter' and isn't actually intended to be hope speech.
606	As a Christian I absolutely cannot stand conversion therapy. God teaches us to love everyone	0	0
607	I am a female and I will be starting mechanical engineering in the fall. this is so inspiring wow.	0	0
608	I’m so glad I have accepting parents. My dad who was raised very very religiously actually accepted me first. He had to tell my mother that it wasn’t a phase and it wasn’t just because I had a bad boyfriend. But now they both love me and my dad has cut his losses with religion (before I came out but he was especially glad he did after I came out). Sadly	0	0
609	IT DOESN'T MATTER WHAT'S RACE YOU ARE	0	0
610	She stans MJ ... Even Mariah Carey whose life he saved	2	1	Without context, plain statement, nothing hopeful
611	I do really hope that the citizens of America Would not judge the color of their skin but the content of their character no matter what race you are or where you from. I do really hope that in the near or Far future that they would adopt the quote	0	0
612	Madonna's music took me through so many hard times. Also	0	0
613	Madonna = born a man !!..no wonder	0	1	Doesn't seem encouraging or hopeful, without context.
614	My dad ALWAYS included me on all his manly things growing up. He is my biggest supporter in pursuing my mechanical engineering degree. I started working in the industrial manufacturing industry and fell in love.	0	0
615	Can I just say... Theres like no proof that God hates Gays...	0	0
616	My inspiration	0	1	Just a plain statement.
617	Some of those kids were so well spokennAnd I hope that man has a wonderful life	0	0
618	How is it going so far? I'm looking to go into engineering too!	0	1	Seems like a conversation, rather than hope speech.
619	“ i don’t believe in lying yourself to make other people happy” That is straight to the bones	0	0
620	You can paint an apple what ever color you want but i will still taste like an apple in the inside	0	0
621	And might not be in a position to come out safely.	0	1	Nothing hopeful or encouraging.
622	Its not!! All lives do matter!! End of argument!!	0	3	Seems like an opposing comment to 'Black Lives Matter' and isn't actually intended to be hope speech.
623	Some Random Girl I’m sorry you’re in the situation. I hope that you’ll find an environment that is accepting.	0	0
624	All lives do matter and im a black person	0	3	Even though the author is a black person, but all lives matter doesn't justify the opposing nature of the movement.
625	You can do anything. You're such an inspiration to continue the hard work. Just like you thanked Debbie	0	0
626	All life is from God not just black	0	3	Seems like an opposing comment to 'Black Lives Matter' and isn't actually intended to be hope speech.
627	i wish i had the courgage to be myself in front of others	0	1	Personal story, nothing encouraging.
628	Well that sucks! People with 1-2 decades of experience in this tough environment not being taken serious is pretty disrespectful.	0	0
629	I'm a trump supporter. I'm anti Islam and anti feminism BUT I'm pro LGBT pro women's rights (just not for all the femenazi BS.	0	3	Seems encouraging for the most part, but talks about anti Islam and anti Feminism which defeats the purpose of the statement.
630	It'a about how hard you work	0	0
631	Whatever happened to Coronavirus? Remember how governments and the elites told us to stay at home and not gather in large groups because of this Deadly Virus. Now the same Elites are supporting this large groups of people gathering and some don’t even speak out against This. nHypocrisy.	0	0
632	Hello! I read some of the comments on this video and got inspired to share my story too. I love in England and I am currently in my first year of college and I'm studying engineering. In my college there are four classes and I ended up in a class where there are 23 boys and I'm the only girl. It was really scary at first because I am already a very shy girl and I struggle with talking to new peop…	0	0
633	Gods Word Matters & until people get serious about God & work 2 live according to His Word	0	0
634	Feminists want equality of outcome	0	0
635	As a female Indian engineer	0	1	Just a plain statement.
636	@Phoebe Reynolds every single study states this is not a therapy in any definition or a standard and it's always harmful	0	0
637	@Morning MaderanI don't know the purpose of bringing up an issue that's over 10 years old and even it's own citizens paid it no respect. US tries to control the internet	0	1	Personal opinion, nothing hopeful.
638	ExtraBitch I’m a Christian and I don’t like conversion therapy	0	1	Personal opinion, nothing hopeful.
639	All lives matter...everything else is blatant evil racism.	0	3	Seems like an opposing comment to 'Black Lives Matter' and isn't actually intended to be hope speech.
640	I will always be amazed for this beautiful soul.Thank you for be there for us	0	0
641	JESUS CHRIST died for all lives from Adam to the last person born on earth. ALL LIVES MATTER.	0	3	Seems like an opposing comment to 'Black Lives Matter' and isn't actually intended to be hope speech.
642	Racism has been through the years yet it still hasn’t disappeared.	0	0
643	But you can be girly and know a lot of technical stuff	0	0
644	This video is a perfect example that you can tell your kids about sexuality. Kids are so much more opened minded then adults	0	0
645	Hey have respect for All Lives MATTER. It's the TRUTH that is being ignored. The Politicians are creating a narrative that diverts attention away from our Childrens Safety.	0	3	More of a political take on the 'All Lives Matter' movement, nothing hopeful.
646	Have you become that strong smart woman in suits designing beautiful constructions visiting the site and giving instructions to the workers yet?	0	0
647	I lost most all except one of my friends after coming out as bisexual. I’m lucky my family is so accepting. My sister is bisexual as well. The only hard part is my grandparents on my fathers side. We meet up every year for a few days. My older cousins bring their girlfriends and every year at the end of the visit my grandparents say to me “Someday you will bring your boyfriend to be with us. We c…	0	0
648	Don't Dare Give Up! Right Now I'm Counting On You Not Giving Up	0	0
649	BLACK LIVES MATTER IS Racist statement... which pushes a narrative of hate and violence .....! IDENTIFYING HUMAN BEINGS BY THEIR SKIN COLOR IS RACIST.....! Besides.. I don't think that I ever met a BLACK person... ! Your skin Color is not black if you really want to go there...	0	3	Seems like an opposing comment to 'Black Lives Matter' and isn't actually intended to be hope speech.
650	@Anja ...it's been 6 years and I'm still bisexual.	0	1	Plain statemenent, nothing encouraging.
651	My mom came out at the age of 39 6 years after she had me lmao	0	3	Isn't intended to be hopeful, seems like a joke.
652	Atheism is Unstoppable	0	1	Plain statemenent, nothing encouraging.
653	This truly hurts my heart. God does not want anyone to hate anyone. God is LOVE and FORGIVENESS. All sin is equal	0	0
654	All Lives Matter	0	3	All Lives Matter is an opposing movement, and has a negative sentiment associated with it.
655	@Molly Rebekah and my free of speech is to say I'm bi	0	0
656	Omggg these kids give me hope for humanity	0	0
657	I cried when the boy said everyone had a choice and he chose love hes so sweet	0	0
658	@Rae baddie nRacist !! All lives do matter and that includes the black children killed in the inner cities that black lives matter never talks about. Black lives only matter to BLM when a white person takes it. nALL LIVES MATTER . Do you think god would say all lives matter is racist ?	0	3	Seems like an opposing comment to 'Black Lives Matter' and isn't actually intended to be hope speech.
659	@Panji Rizki religion is a choice whereas homosexuality is something you're born with x	0	0
660	god gave us a choice my choice is to love 🥺	0	0
661	FINALLY ...something positive!!	0	0
662	No we are all from earth and Africans can live in America so what if you aren’t from that place	0	0
663	I work for a tech company and recently conducted job interviews at a local engineering school. Less than 10% of the candidates were women. As much as we support and strive for diversity in our company	0	0
664	Amazing speech! Really motivating!	0	0
665	God wants understanding and acceptance of others. That’s it. Literally the number one rule is love thy neighbor! nThese people. Smh.	0	0
666	School is no longer about knowledgenEnglish class might not be so much about knowledge as it is about skill	0	1	Personal opinion, nothing hopeful.
667	There is no color	0	0
668	What matter? Every lives is matter	0	3	Seems like an opposing comment to 'Black Lives Matter' and isn't actually intended to be hope speech.
669	The girl saying she doesn’t agree with homosexuality... she was taught that way of thinking I don’t believe she really feels that way it’s just what she was taught to say and think. She was very kind and respectful I know she’ll change her mind on homosexuality when/if she ever feels comfortable enough with herself. Good luck to her and the guy telling his story in the video (sorry I don’t rememb…	0	0
670	She saved and changed my life. Love u my Queen.	0	0
671	I’m currently studying engineering right now and this honestly gave me the motivation to finish the rest of the semester. It’s so incredibly easy to feel defeated in this field	0	0
672	I love Madonna she’s a trailblazer and trendsetter thx Madonna for being unapologetically yourself and spreading love and empowering messages your so inspirational love my beautiful queen Madonna	0	0
673	All lives DO matter. No one is better than the other. Sanders is a fraud. He got arrested in 1964 for throwing eggs at black protesters.	0	3	Seems like an opposing comment to 'Black Lives Matter' and isn't actually intended to be hope speech.
674	America is not a Patriarchy	0	1	Opinion or just a statement, nothing hopeful.
675	@Ashley Laurencya I am sorry but these tortures doesn't work for anyone	0	1	Without context, neutral statement.
676	The lgbtq helped launched Madonna and the fact she basically knowdlgeses it every time in her song and in her daily life is iconic	0	0
677	ALL LIVES MATTER!!! To say otherwise is just racist	0	3	Seems like an opposing comment to 'Black Lives Matter' and isn't actually intended to be hope speech.
678	Take your time. You'll be able to do that and be yourself.. You can do it.	0	0
679	@andantina lol. Trying to fight off the trauma	0	1	Without context, neutral statement.
680	So you're good with homosexuality	0	1	Seems like a conversation.
681	All lives matter is a statement not a movement we're not asking for anything so why is bad	0	3	Seems like an opposing comment to 'Black Lives Matter' and isn't actually intended to be hope speech.
682	BLM sounds racist to me it should be human lives matter	0	3	Seems like an opposing comment to 'Black Lives Matter' and isn't actually intended to be hope speech.
683	Madonna is often criticized and looked down on because she is such a strong advocate for undeserved and neglected populations. It’s not only due to her provocative nature. I was waiting for Madonna to say that she is sexually fluid and/or bisexual when asked why she is such an advocate for the LGBT community. I’m not sure if she is or not but always thought she was/is.	0	1	Personal opinion about Madonna. Doesn't highlight enything encouraging, just an opinion about it.
684	I don't think Hillary is stupid. I think she's frighteningly smart. I think she and the Donald are attempting to troll conservatives out of existence.	0	0
685	So emotional watching this I'm not black but I felt that!! why should they have to walk past that filth every day and in this day and age when they are still prosecuted every day for just having a differnt shade of skin colour !! the most beautiful and diverse of all colours it makes me sick to think they suffer systematic racism every day wee are 1 this isnt black against white this is united we…	0	0
686	Keep up the good work Debbie. I always like to work with female engineers	0	0
687	Tony Gokk our world is over populated by a lot. You can still adopt a child. A poor loving child who needs attention and longs a home. If this is a religious thing	0	0
688	Thank you so much sis .. I feel better now	0	0
689	I wouldn't say fighting for civil rights and social justice is pointless	0	0
690	Ill say it. Im not scared. ALL LIVES MATTER. ALL LIVES MATTER.	0	3	Seems like an opposing comment to 'Black Lives Matter' and isn't actually intended to be hope speech.
691	Thank you so much for this! I'm a high school student with a few years into college. I couldn't decide between Architecture and Civil Engineering	0	0
692	I love u Madonna i came out and told that I've always liked Women... N sumhow i always wanted to be a Man...	0	0
693	Blue Lives Matter. Black Lives Matter. Hispanic Lives Matter. Asian Lives Matter. White Lives Matter. ETC.....All Lives Matter! Defend the Police. Reduce crime. Stop resisting arrest. Stop talking back. Obey the Law. Respect the Police and anyone in Authority. Simple Rule. Criminals are like Children. You need to punish bad behaviors. Law and Order and Justice=A Civilized Society.	0	3	Seems like an opposing comment to 'Black Lives Matter' and isn't actually intended to be hope speech.
694	This is so inspirational to female engineers like myself. Almost cried out of happiness. Thank you for this.	0	0
695	I’m from the UAE and they respect everyone	0	0
696	This really inspired me... I am doing my first year in computer systems engineering. Just 4 girls out of 17 boys.. I am never giving up. Its hard but worth it	0	0
697	All are a like unto God.nAnd we should be ashamed to thing we are above someone. nJesus Christ said no better love then this but he who lays down his lift for his friends.nAnd that is just what Jesus Christ did for all who ever lived. nTo him each of us matters.nWho are we to say one color is above another.nWhite people died to free slaves. And Black people died to keep our country free. We owe a…	0	3	Seems like an opposing comment to 'Black Lives Matter' and isn't actually intended to be hope speech.
698	The color of are skin does not define are personality or are capability of doing and accomplishing stuff... Its just a color or more specific it's just a genetic	0	0
699	This man is inspirational. I loved this.	0	0
700	All lives matter not stop being racist in this country.	0	3	Seems like an opposing comment to 'Black Lives Matter' and isn't actually intended to be hope speech.
701	Im currently doing civil engineering im a girl and im on a wheelchair which makes it even worse everone looks ar me like I'm crazy how are you going to go on site those are the few demoralizing question i get. and this video made me cry so much . And i have to say it is not fair there are more boys than girls it is intimidating.	0	0
702	Emilee Henderson exactly she wasn’t being rude in anyway she was just giving her opinion like there’s no need to harass anyone	0	0
703	All lives matter for SURE! Everyone is equal.	0	3	Seems like an opposing comment to 'Black Lives Matter' and isn't actually intended to be hope speech.
704	That's incredible!!! Keep it up!	0	0
705	I was fortunate enough to have parents who gave me duplo and lego construction toys as a child. However I have still always felt what you talk about. Fitting in is something we all strive for however I would never want to compromise who I am to do so. I cannot wait for some of my family friend's daughters to get a bit older so that I can get them GoldieBlox as a gift. This is an amazing initiativ…	0	0
706	WE ALL ALLLLLLLLLLLLL HELLO ALLLLLLMATTERS IN GOD'S EYES ..GOD'S EYES ARE ON YOU THREE MEN'S AND THE WORLD EVEN ME HELLO...PRAY	0	3	Seems like an opposing comment to 'Black Lives Matter' and isn't actually intended to be hope speech.
707	All lives matter isn’t a movement. nAll lives matter is a statement! EVERY LIVE MATTERS!!! Why is that so hard?	0	3	Seems like an opposing comment to 'Black Lives Matter' and isn't actually intended to be hope speech.
708	I noticed that too it's not right! All Lives Matter!	0	3	Seems like an opposing comment to 'Black Lives Matter' and isn't actually intended to be hope speech.
709	I won't support any kind of brutality both sides show at this time... The american police is known to be hard and brutal and when I look at the laws of this country I'm not suprprised by the crime rate. the people trying to stop racism by hurting people are questionable too... People who weren't even involved got hurt by both sides (mostly from the police)	0	1	Personal opinion, nothing encouraging or hopeful.
710	God doesn't see color he sees what's in our hearts so therefore all lives matter it's just a choice of heaven or hell so you choose	0	0
711	Can we please talk about the serious topic at hand instead of assuming what a child's sexuality is?	0	0
712	God put us on this Earth for a reason he put lgbtq so people know it's okay to be different ‍‍‍‍‍	0	0
713	ALL LIVES MATTER WE ARE ALL GODS CHILDREN ANYONE WHO BELIEVES OR THINKS ANY DIFFERENT WILL PROBABLY END UP BURNING IN HELL READ YOUR BIBLE AT WHAT TIME DID IT BECOME WRONG ? ITS ALWAYS BEEN THE TRUTH KNOW GODS WORD BECAUSE ONE DAY YOU WILL END UP FINDING OUT THE HARD WAY ITS NEVER TOO LATE UNTIL ITS TOO LATE !	0	3	Seems like an opposing comment to 'Black Lives Matter' and isn't actually intended to be hope speech.
714	When I was a little girl I hated pink and I hated dolls and I loved the cars in the boys section I envied boys section and I always wondered why is there only dolls and baby's in our section?	0	1	Nohting hopeful or encouraging.
715	Conversion therapy needs to be illegal	0	0
716	This conversion-therapy is pure nonsense and is the most ridiculous and damaging trash I have ever heard of in the 21st century ! It is all too often religiously-fueled poison and can never work. One can simply never turn a homosexual into a heterosexual any more than one can attempt to turn a heterosexual into a homosexual ! Did anyone ever attempt that ? It is as if the ignorance	0	0
717	So proud of you debbie..you really are an inspiration..I'm a girl pursuing electrical engineering in India..I was struggling a lot... You help me boost my confidence that I can be a great engineer..Thank you	0	0
718	Agreed. I grew up in a conservative household and I saw homosexuality as being bad until I was 18. Now I’m 24	0	1	Personal story, but nothing hopeful.
719	Beating someone with a Bible? Have they ever actually read the book? To say nothing of the fact that beating someone to get them to do something is liable to make them more determined not to. Of course it doesn't work - anyone who expects otherwise is kidding himself.	0	0
720	Do not give up hope not matter what	0	0
721	Because the most common thing I’ve used to describe it is “if your house is on fire but mine is fine why should you have fireman come help you because all houses matter” saying all lives matter takes away from the problem	0	3	Seems like an opposing comment to 'Black Lives Matter' and isn't actually intended to be hope speech.
722	Several deaths can be directly and indirectly linked to conversion therapy. From suicide and long term impacts from the physical abuse such as brain or limb damage to some links to hate crimes against the failed projects of some of these camps.	0	0
723	when someone says “i dont agree with homosexuality” is like hating people who are left handed	0	0
724	Maybe saying a feminist country would be a bit of a stretch (not really) but we're definitly a PC country	0	1	Political view, nothing hopeful.
725	I am American women and I work with 2 black women and I showed up to work when 1 or the other need to be relieved nnSometimes I don't get a day off. I do my part as a caregiver. I don't say much. I got wiped with a woden spon when I learned English in my Afrikaans School since all South Africans has to learn 3 languages. If I misspell a word in English. It was hard learning English in my hometown…	0	0
726	my sister do math! i know girls do lot of math. we need more girl perpective in ingeniering..!! like this women.nthe man engineers make bridges	0	0
727	all lives matter but black lives are not currently being treated equally. the goal of the BLM movement is to create equality not supremacy	0	0
728	It’s a fact but it’s not the case at this time. We don’t have oppression at such a large scale by ‘all races’. There are problems in the black community that needs to be fixed at this very moment. Of course all lives matter but saying all lives matter against black lives matter is like math. You have a problem you need to solve so you solve one problem at the time	0	3	Seems like an opposing comment to 'Black Lives Matter' and isn't actually intended to be hope speech.
729	Yes like theres no differences We are all humans	0	0
730	I wish people would love. A lot of Christian denominations are loving to LGBT+.	0	0
731	I’m so sorry for what has happened to you by so called Christians. I’m a Christian and we’re here to love and meet others we’re they are not force our beliefs onto others and hurt people. That’s never what Jesus intended and I apologize for them.	0	0
732	It's very special to understand the real meaning of life. This flower is for u madonna	0	0
733	Im studying chemistry. But boy engineering is amazing I have a lot of female friends in that field.	0	0
734	I don’t think testing school kids on science is really indicative of STEM aptitude. Girls brains develop faster and they are typically better students early on. Also	0	0
735	Love is Love!	0	0
736	I read my dads engineering magazines in my spare time - other girls go shopping at the mall	0	1	The statement describes a personality, but not necessarily hopeful.
737	sara leong I love science as well!!! But it is extremely hard for me to focus in math. Mainly because (probably because of classes arrangements) I am one of the only three girls in my math class of 12 and almost all the boys didn't know what staying on topic meant. They would yell and chat loudly. The teacher just seems to not hear them (probably because she has learned that it gave her less head…	0	0
738	Jessica Walker but... there is no perspective. You don’t agree or disagree with homosexuality just like you don’t agree or disagree with Down syndrome	0	0
739	They forget about the context and the reason why Black lives matter is a thing when they discuss Black lives matter and all lives matter. It should not be a problem to say all lives matter	0	3	Seems like an opposing comment to 'Black Lives Matter' and isn't actually intended to be hope speech.
740	The protesters (rioters) seem to favor the herd immunity strategy regarding the pandemic. No social distancing	0	1	View / opinion, nothing hopeful.
741	These kids are really mature and understanding! nThe girl with short hair probably didn't grow up in a environment that allowed her to develop her own opinions and values	0	0
742	Why are you doubting yourself because of some perceived notion that people don't believe that you are in the job in which you say you are? nnJust keep doing your job and create awesome things	0	0
743	@Vera a all lives matter. Regardless of your skin colour. By saying blm you're dividing us. Which is literally taking 10 steps backwards. How do u not see this?	0	3	Seems like an opposing comment to 'Black Lives Matter' and isn't actually intended to be hope speech.
744	All Lives Matter. Not Just Black.	0	3	Seems like an opposing comment to 'Black Lives Matter' and isn't actually intended to be hope speech.
745	I say it differently. Human lives matter. If only black lives matter then someone is racist.nWhen I pull a man out of a ditch he's not white or black or brown	0	3	Seems like an opposing comment to 'Black Lives Matter' and isn't actually intended to be hope speech.
746	@Kazi Ovi But they certainly have more female engineers than you do.	0	0
747	ALL LIVES MATTER NOT JUST BLACK LIVES. EVERYONE IS GODS CHILDREN. NO ONE IS ABOVE ANOTHER. WHAT WE HAVE SEEN CURRENTLY IS EXTREME MAOIST ATTITUDES. DEMOCRATS ONLY PANDER TO THESE ANTIFA AND B.L.M. EXTREMIST GROUPS. -CCFP coalition of the conservative free people.	0	3	Seems like an opposing comment to 'Black Lives Matter' and isn't actually intended to be hope speech.
748	I’m 12 and I’ve known I was into girls since I was 6. When I was 9 or 10 I didn’t know about homophobia and things so I came out to some of my friends ( I also didn’t know they were religious) and they told a lot of people at my school	0	1	Personal account, which highlights a negative thing. Nothing encouraging.
749	stop forcing people to forcefully study engineeringnengineering is made for humans nif a girls want to study engineering she willnif she wants to study something other than engineering she willnIts totally her choice.nnnnnA person should only study something in which he/she is interested in and thus can excel in that field only.	0	0
750	@J. ROD I agree slavery was bad. But should we use our modern day judgement to justify wether or not they're bad. They didn't think like us. The things they've done were bad. Yes. But without them you and I wouldn't be here. We modern days humans think certain things in the past were wrong. They were normal back then. Yes? My main point is	0	0
751	Keep hanging in there I totally get you darling am doing Electrical engineering am african so I get you	0	0
752	The kids were adorable and so mature we need more kids like them in this world	0	0
753	It really sucks at least in america you have freedom of speech for now. I can't believe in 2020 we are still having skin colour prejudice and issues as a result it is pathetic if in millennia we can't get past something so simple as to understand that diversity is a benefit to our survival as a species we are doomed.	0	0
754	Conversion therapy is torture. The government should close all of those centers	0	0
755	Dude do you realize how many people get depression and comit suicide after going to conversion therapy? Is literally one of the most mental unhealthy things.	0	0
756	Inspiring and Go Girl	0	0
757	growing up extremely low income and as a woman of color engineering resources were not handed to me there were no toys this warmed my heart to know that girls my nieces age have toys like this regardless of that I'm honored to say I've been accepted to some incredible universities as a bioengineering major so screw anyone who tells young women especially minoritiy disadvantaged that we can't do i…	0	0
758	littlemermaid All the best Sis...	0	0
759	I’d say they are biased maybe not racist but all lives do matter	0	3	Seems like an opposing comment to 'Black Lives Matter' and isn't actually intended to be hope speech.
760	Weather your white or black just think for a solitary second suppose you were white and it is all of a sudden that it was illegal to say all live matter and only black lives matter was allowed to matter how would that make your kind feel????nnIf I were all of you I would heavily think about not caring for only one nationality one race and only one skin color and think about each and every ounce o…	0	3	Seems like an opposing comment to 'Black Lives Matter' and isn't actually intended to be hope speech.
761	B. Scott that's because they claim that Martin Luther King is there role model yet they turn around and contradict everything that he has said I'm sorry but they failed Martin Luther King if they're going to live up to his expectations that man was a saint he said all lives matter I can prove it we are all created equal I have a dream we are all created equal I'll say it again we are all created …	0	3	Seems like an opposing comment to 'Black Lives Matter' and isn't actually intended to be hope speech.
762	you're so amazing i'm an engineer too and i'm spending the same moments like you now because of our culture in Egypt .. and i just have the same thoughts ... thanks a lot for doing such a great thing	0	0
763	I would like the kids to meet people of all LGBT+ identities. It’s be really good for them to meet Aro and Ace people.	0	0
764	I came out as bisexual and she is one of the main reasons why I turned bi. I have the biggest girl crush on her and I still do! Go Madonna!	0	0
765	Madonna educates people on many things.Shes there because she’s destined for it.She does a lot of good admirable things.	0	0
766	I say all lives matter I don't care who likes it and who don't point blank ALL LIVES MATTER	0	3	Seems like an opposing comment to 'Black Lives Matter' and isn't actually intended to be hope speech.
767	I used to think that all lives matter. But now I'm thinking we would all be happier without blm.	0	3	Seems like an opposing comment to 'Black Lives Matter' and isn't actually intended to be hope speech.
768	@EVITA 01 neither did you obviously it says not to lay with another man as you would with a woman and it states that it is an abomination never says to hate anyone in the bible it literally states the opposite	0	0
769	Beautiful interview. She has done so much for the LGBTQ community over her 35-year music career. This was such a genuine and heartfelt interview. What a beautiful person she is!	0	0
770	...mdna...you're a beacon of hope in a dark unpredictable world....thank you for standing up and continuing the fight for change...i love you	0	0
771	All lives are what you make of them. We are all born and we will all die	0	0
772	she is a great engineer. i also want to become a professor of civil engineering and teach uni students. i was really inspired by her. great work>!	0	0
773	Women should have the oportunity to follow their dreams despite anyone telling them NO you can't!	0	0
774	It's cultural because girls in 3rd world societies go for jobs they don't enjoy but that pay well	0	1	Not a hopeful statement.
775	All lives matter. I speak for all black people when I apologize for BLM.	0	3	Seems like an opposing comment to 'Black Lives Matter' and isn't actually intended to be hope speech.
776	His voice makes my throat hurt	0	1	Not a hopeful statement.
777	The Democratic Party is more dangerous to America than ISIS	0	1	Political view, not hopeful.
778	Im a senior high school girl. I want to become a successful civil engineer. This talk gives me courage. Thanks debbie. you inspire me more	0	0
779	She represents humanity compassion	0	0
780	Incredible...Awesome...so uplifting and inspiring ...THANK YOU	0	0
781	I am inspired every time I watch this. Bookmark this	0	0
782	Slavery! the most heinous and disgusting crimes ever! We can't honour slave traders as heroes	0	0
783	Career choices depend on personality differences and result in differences in interest. Women have different personalities than men and therefore they choose careers based around “people” 60% of the time. Men choose careers based around “things” 60% of the time. It’s biology not culture. If a woman feels like she doesn’t fit in ANYWHERE	0	1	A personal view, nothing encouraging or hopeful.
784	Asiya you can't disagree with sexuality lmao- it's like saying you disagree with people being black	0	0
785	You don’t get to “agree” not “disagree” with another person’s sexuality or existence! No idea why so-called “Christians” think they are entitled to have a say in other people’s lives...didn’t Jesus say judge not lest he be judged?	0	0
786	I thought all lives mattered...	0	3	Seems like an opposing comment to 'Black Lives Matter' and isn't actually intended to be hope speech.
787	All lives matter says God.	0	3	Seems like an opposing comment to 'Black Lives Matter' and isn't actually intended to be hope speech.
788	How did it go?? Please don't give up!	0	0
789	This just endears me more to Madonna......What a beautiful inspirational woman she is	0	0
790	Say all lives matter is	0	1	Incomplete staement or sentence.
791	i have always wanted to go into engineering because my dad told me that but i really didn't know what it was and know i really want to do it. I am eleven and i and really inspired already… Thanx	0	0
792	“God gave us a choice and I choose to love” so powerful. Sadly not all Christians think like this	0	0
793	Conversation “therapy” ??? No way. Im pretty sure that that’s abuse.nA few people might disagree	0	0
794	We are missing the best female talent. There may be females that are truly interested but not encouraged (as in told about engineering not forced) or bullied out of it (there have been studies that show capable females leave STEM because they are bullied by peers or faculty). I do not force anyone into a field they are not interested in - I have a cousin that would be capable but not interested. …	0	0
795	she changed my life	0	0
796	A year later and I hope you are fulfilling your dream <3nI reported a comment and I truly hope you had not seen the remark.	0	0
797	I would have been fine with ALM if it didn't come right after BLM.	0	0
798	this woman is a pioneer and I love her endlessly for all of her work towards helping the LGBTQIA+ community and certainly women	0	0
799	@Vinnie McBride yeah. Now that is racism. Shouldn't be black lives matter. Should be all lives matter.	0	3	Seems like an opposing comment to 'Black Lives Matter' and isn't actually intended to be hope speech.
800	The lives of recidivists are not important. And it doesn't matter about skin color!	0	3	The fist part of the statement is not hopeful, rather offensive or questionable.
801	She's so about on the verge of tears. This is PURE. She's an awesome human being. I love you MadonnanThanks for all you've done. I came out this year	0	0
802	These kids are being raised by parents. I wish more kids were being raised by parents instead of breeders. I'm child free but I'm fine with kids like these. The kid saying..I choose to love was awesome.	0	0
803	@jimmy sheridan it was wrongly translated. It should say to not lay with a boy (the wrongly translated version says man ) and it refers to pedophilia	0	0
804	@Sunshine littlephilly I have a question. I’m not lesbian but I have so many friends who are apart of LGBTQ community and I support and honestly would do anything for them	0	0
805	Every life matters I’m rich and white and I’ve never been taught to hate I have friend of all color cause I’m purple!! Get it together people!!	0	3	Seems like an opposing comment to 'Black Lives Matter' and isn't actually intended to be hope speech.
806	“God gave us a choice and I chose to love” EXCUSE ME WHILE I GO CRY. THIS KID IS TOO CUTE	0	0
807	God loves all lives conceived and born.	0	0
808	I'm a female engineering student right now. I'm so glad this is in my recommendation.	0	0
809	If women can go into engineering without being judged	0	0
810	Remember what Martin Luther King Jr said that every body should be treated equally. So black people can’t even listen to there own race with out even saying BLM. Because if Blacks mattered and whites didn’t then we aren’t treated equally. Cut the BS and help our future crisis for GD!	0	3	Seems like an opposing comment to 'Black Lives Matter' and isn't actually intended to be hope speech.
811	i’m 12 years old and i’m bisexual	0	1	Neutral statement.
812	the kid who said his choice is to love.. that’s a fantastic kid	0	0
813	This video is awesome! I'm a 15 year old girl who will probably go into engineering at uni and can't wait!	0	0
814	She's an icon and idol. Very inspiring. Thank you for the uplifting words	0	0
815	Not all Christians think this way. I don’t. I think it’s disgusting how they treated him	0	1	Without context, neutral statement.
816	Girls can do much better than boys	0	3	Promotes superiority rather than equality.
817	ALL lives matter! Otherwise it’s a racism.	0	3	Seems like an opposing comment to 'Black Lives Matter' and isn't actually intended to be hope speech.
818	My family is very religious and I don't know how they'll take it if I ever tell them that I swing both ways. I'm happy for the kids who have such a positive view on the LGBT community	0	0
819	jules has a lot of vision about life. i really love how he tries to understand everyone and he is really a wonderful child	0	0
820	Through all the years her music got me through some tough sh*t ....I will always be grateful 🧡	0	0
821	We were all created equal . USA is the land of the free home of the Brave.	0	0
822	Human Lives Matter Colour dus not.	0	3	Seems like an opposing comment to 'Black Lives Matter' and isn't actually intended to be hope speech.
823	Saying All lives matter can be offensive for the same reason black lives matter can be offensive to some. Black Lives Matter is an offensive saying because to some it insinuates that the majority of non blacks think that black lives don't matter and that the majority of non blacks are racist when there is absolutely no physical evidence to support that thought. So obviously to a non racist non bl…	0	3	Tries to explain both sides of the coin but has a lot of offensive things being said.
824	I wish people understood that sexuality is a spectrum and we don’t all have to fit into a specific box. We are all human ... we all love	0	0
825	So all the politicians are jumping on the band wagon. joke. All lives do matter. I have an issue when i see 50 or so black people stopping traffic and letting black people through but smashing the windows on white peoples cars? is that not the same thing they want to stop	0	3	Seems like an opposing comment to 'Black Lives Matter' and isn't actually intended to be hope speech.
826	There is good and bad in all races and all professions. All races face discrimination from people who are jerks. There will always be those in the world that do not see the person for the special person that they are. It isn't right. I just have to believe that those who promote hate through discrimination will answer for it when they stand before God.	0	0
827	The sad thing is this is the least abusive conversion therapy I've ever heard of. My friends have scars and burns where they were shocked and burned and tortured. It was so bad that you have to pretend to change to get away from it. There is no shame in lying to end the torture. I wasnt put in that situation but I was homeless for a bit	0	0
828	I hope this changes	0	0
829	This is a great video. As a female engineer I run into all of these struggles on a daily basis. I also had a hard time learning spatial skills and struggled in drawing/CAD class. GoldieBlox is a great first step to helping get more girls interested in engineering and build their confidence in STEM.	0	0
830	She represents humanity compassion	0	0
831	All lives matter includes every life	0	3	Seems like an opposing comment to 'Black Lives Matter' and isn't actually intended to be hope speech.
832	As I commented of the video of her speech	2	1	English but clearly hope speech
833	I don’t agree with it but I have friends that r lgbt ‍ and I respect them and love them even if I don’t agree god will always love them	0	0
834	Everyones life matters	0	3	Seems like an opposing comment to 'Black Lives Matter' and isn't actually intended to be hope speech.
835	I loved this video! It was so inspiring! I really want to be a structural engineer when I grow up!	0	0
836	Sheila Makena when “not agreeing with someone” leads to crimes against the lgbtq people (such as conversion therapy). It is in fact being homophobic	0	0
837	All lives matter is good. Saying black lives matter alone is racist.	0	3	Seems like an opposing comment to 'Black Lives Matter' and isn't actually intended to be hope speech.
838	Sunshine littlephilly disagreeing with someones existence and being against their ultimate happiness is never loving and kind.	0	0
839	Actually it depends on ... Great many things. All lives matter	0	3	Seems like an opposing comment to 'Black Lives Matter' and isn't actually intended to be hope speech.
840	All lives obviously	0	1	This statement looks incomplete.
841	Can I be honest? Idga single f what others think about me and am just learning that there aren't many women in the engineering field. It doesn't really trouble me one bit. My goal is to study it	0	0
842	skin is not a race it is an organ that covers our body. if it is black white or whatever colour it is only an organ. what is wrong with people. if black lives matter so much why are they killing their unborn children at such large numbers. BLM only cares about getting money for their movement and not the people who they claim to be fighting for. they don't care about anyone but their bank account…	0	3	Seems like an opposing comment to 'Black Lives Matter' and isn't actually intended to be hope speech.
843	I’m very lucky that all my friends and family respect that I am bisexual	0	0
844	All lives matter!! I shout it from the roof top! My family died for all people	0	3	Seems like an opposing comment to 'Black Lives Matter' and isn't actually intended to be hope speech.
845	I’m so glad that my brother wasn’t sent to “therapy” (ahem torture) for being trans.	0	0
846	I think she’s came out as bisexual	0	1	Neutral statement.
847	>I'm not in their shoes and I can't pass judgementn>remember that these issues are systemicnn>Can't Pass Judgementn>Judges the problem is systemicnnNo	0	0
848	I saw it just now! Like where have i been? This is amazing!	0	0
849	@kennedy mensah Get Over Yourself because we all live and die!! Just look for PEOPLE NOT COLOR!	0	0
850	Yes it is controversial to say at this time after this tragedy all lives matter. Yet It's a shame for America to say black lives matter- 2020 still stuck with racism. It means a black life is worth less. If feels bad to hear it. As human specie we have a lot more to learn and need to have some humility. We were just hit by a virus	0	3	Seems like an opposing comment to 'Black Lives Matter' and isn't actually intended to be hope speech.
851	RACISTS CANNOT WIN	0	0
852	You can't change the world with hate you just make hate and you can't change people without showing a changing in yourself if someone going stay corrupted the rest of the world ain't going to change for you and some people and going to change you just got to be happy in your life amongst a world full of haters	0	0
853	ALL LIVES MATTER🤘🤘WE ALL SHARE THIS WORLD.. SO ALL LIVES MATTER..	0	3	Seems like an opposing comment to 'Black Lives Matter' and isn't actually intended to be hope speech.
854	I really like that they're introducing kids to these subjects. It's incredibly important escpecially in this day and age.	0	0
855	@Anneloes Barth I am all for people being happy	0	0
856	Good on the women choosing these fields instead of the whiners that say more women should be in STEM but hold a degree in social justice (or similar pointless crap). Be the change you want to see.	0	0
857	During school I learnet that my friend was lesbian oh cool my friend is lesbian I respect them	0	0
858	@K W Well considering this is a post related to the protests that's why he is saying it. Any mass gatherings at this time no matter the reason are going to spread the virus which is something we all want to avoid. I agree with the message of the protest but it's not the right time to do it.	0	0
859	We don't have the right to hurt others.......ever ....for ANY REASON!!	0	0
860	All lives matter! That includes black lives. We need to get on our knees and seek God and his will. Putting God first in life is putting your self first. God has your best interest in mind. You are important to God	0	0
861	You need people who encourages you! Keep working on it you never going to know how good you are until you try it!	0	0
862	@Vernice Davis I'm not white and I believe that all lives matter. Isn't it a bit racist to assume that all black people agree with your values?	0	3	Seems like an opposing comment to 'Black Lives Matter' and isn't actually intended to be hope speech.
863	I wonder how MANY people Madonna saved from suicide. I am not a fan of Madonna but I can understand the love between she and her FANS.	0	0
864	@Tea Just Tea all lives matter is what It's presented as. ALL LIVES MATTER!!! You can deny it all you want to but all lives matter.	0	3	Seems like an opposing comment to 'Black Lives Matter' and isn't actually intended to be hope speech.
865	@Kiri Kiri I felt that. After having just come out to my parents after being married and feeling safe after 4 years of being with my spouse who encouraged me through it all	0	0
866	Daisy_Tail commented on the absurdity of not agreeing with something nthat's simply an unchangeable trait of a person	0	1	Not a hopeful statement.
867	Yes that was genuine. Bless her. Never give up hope love you lady.x	0	0
868	We are equal humans. nAll of us are equal.n🤝🤝🤝🤝🤝🤝🤝	0	0
869	This video almost made me cry... The struggle is real.	0	0
870	“Therapy” more like literal abuse	0	0
871	Wow. I didn't realise her kind of music could have that impact. I was a fan when I was younger.	0	0
872	Nothing is stopping woman from being engineers.	0	0
873	@Miguel Baham Prove it is what lazy and deeply stupid people say when they are too lazy to do the research themselves. If you actually knew the Bible your comment wouldn't be so blunderific.	2	1	Since it is english it cannot be 2, and it is not hopeful.
874	I don’t agree with homosexuality but I do agree with being true to your self and accepting people no matter what	0	3	Mostly hopeful except the first part, offensive.
875	So true and this world has gone to hell in a hand basket. All lives matter and WE ALL NLEED RED!!!	0	3	Seems like an opposing comment to 'Black Lives Matter' and isn't actually intended to be hope speech.
876	All life matter s Jesus tells us all life matter!	0	3	Seems like an opposing comment to 'Black Lives Matter' and isn't actually intended to be hope speech.
877	This is amazing and i wish this kind of toy was around when I was young. It's important for us all to not pigeon hole kids according to their gender or race. I wish you many more successes @DebbieSterling and @GoldieBlox	0	0
878	Nobody is stopping women from attending the schools/classes they want	0	0
879	IAM a girl studying software engineering	0	1	Neutral statement.
880	“god gave us a choice	0	0
881	Lonelymilanj are you for real...she did her work when no one else did.	0	0
882	@eve lewis Hi Eve. It's never to early to start learning engineering! Especially these days	0	0
883	i am a man and i support this.	0	1	Without context, neutral statement.
884	They just mean..Black lives matter too..because over looked alot in past..at times..thats all they mean..duhhhhh. Of course everyone knows all lives matter even animals.	0	3	Seems like an opposing comment to 'Black Lives Matter' and isn't actually intended to be hope speech.
885	She is sooo nice. God bless her. Love from Colombia	0	0
886	I'm 9 and by watching this video I want to be a gaming scientist!!	0	0
887	I came out at the age of 6	0	1	Personal story, neutral statement.
888	She is rare species. Both engineer and so beautiful.	0	0
889	She is genuinely a fighter for love	0	0
890	You can! believe in that! it is not easy but its posible! xoxo	0	0
891	glad that there are efforts to encourage women to pursue STEM	0	0
892	Racism is the belief that one race is superior than another. I don’t see how being conscious of your race makes you believe that any embrace is superior	0	0
893	@A G I understand that but I wasnt suggesting All lives matter should be the response and thats it what I am suggesting is booing all lives matter is racist and we need to recognise that or though BLM is a great thing we have to be careful not yo cause more racism and division as whatever the corr message is people take things and run with it using good things to hurt good people	0	3	Seems like an opposing comment to 'Black Lives Matter' and isn't actually intended to be hope speech.
894	Yea All Lives Matter	0	3	Seems like an opposing comment to 'Black Lives Matter' and isn't actually intended to be hope speech.
895	Why's is it only black lives matter. I feel like that's just another form of racism and segregation. It should be all lives matter.	0	3	Seems like an opposing comment to 'Black Lives Matter' and isn't actually intended to be hope speech.
896	We are all humans with likes and dislikes diffrent looks with all the same rights	0	0
897	starrynight0621 I’ve never faced any kind of sexism at my school but because I’m the best at maths and science in my class the boys can’t exactly say ‘it’s a boy thing’	0	0
898	We all cannot dismiss the influence she has had in the progress for change in LGBTQ rights	0	0
899	all lives matter.n_all_ na l l. nThat includes black lives. n	0	0
900	i'm really amazed by his perseverance. i probably would have broken down and pretended to be straight just to get out of it	0	0
901	Easy to complain. Why don't you start your own company or invent something. Stop complaining and step up!	0	0
902	These kids are always so polite and respectful I love it	0	0
903	omg how can someone be that amazing	0	0
904	i love that lil man with grey. thoughtful and so wise🧡	0	0
905	Stephanie South You may live paycheck to paycheck	2	1	Not hopeful but in English
906	It's amazing. I felt compelled to comment after being truly inspired by this woman	0	0
907	I've been told by believing Christians that Jesus hung out with those who were marginalized by society. To show love and support. That would include our LGBTQ kids	0	0
908	I loved how the boy asked how he can support his friend on sexuality so he can be there for him like that is so darn sweet‍	0	0
909	Also in my country female students are better than male students in every lesson. It's not because they are less than girls	0	0
910	Revolutions eat themselves.	0	1	Not a hopeful statement.
911	Everyones life SHOULD matter. Clearly black people in usa overall do not share this EXP. Maybe ask them why they say BLM. Maybe to them they see a place that does not value their lives.	0	0
912	+Morning Madera Slavery in America ended 200yrs ago	0	1	Fact or statement, nothing hopeful.
913	With so many people thinking that they are God's. If that were true than why don't they see that God looks at everyone with pure love and he filled our world with wonders that all people need to experience like the healing power's of all he created. If all lives matter than we will all prosper as it should be. When only one race matters it is doomed to fail because to actually be a true success a…	0	3	Seems like an opposing comment to 'Black Lives Matter' and isn't actually intended to be hope speech.
914	God gave us a choice my choice is to love I would die for that kid	0	0
915	“For God shows no partiality.”nRomans 2	0	0
916	It's not something you can disagree with. LGBTQ+ people exist. That's like saying you disagree with being Asian	0	0
917	ESTE PSICÓPATA MASÓN LUCIFERIANO ES HOMBRE TRANS.	2	2
918	I'm a hispanic female studying computer science	0	1	Neutral statement.
919	ALL lifes matter. When people boo that do they think that black live matter more. I dont know to much about this butI think ALL lifes matter	0	3	Seems like an opposing comment to 'Black Lives Matter' and isn't actually intended to be hope speech.
920	@Chīsana Kodomo All lives Matter literally means All lives including Black lives matter. No wonder why people don't support BLM anymore.	0	0
921	I'm religious and LGBTQ+	0	0
922	I cried..... I am also a girl who wants to be an engineer since I was in middle school. Thank you so so much I love it🥺	0	0
923	She literally introduced the world to the ballroom scenes. Especially in a time when homosexuality was taboo.	0	0
924	I am a kid who dreams of being an aerospace engineer at nasa	0	0
925	She saved my life and gave me a new hope	0	0
926	Hive-Mind. Emotional Contagion. Mass Hysteria. Bandwagon. Victim Mentality. Woe-is-Me. Covid-19 Boredom. Pent-up Frustration/Anger/Aggression. Lost sheep looking for a(ny) cause. Misled n Astray. Baaah! Deflection. Diversion. Distraction from all the real issues on our planet! What ever happened to creating/contributing/community/unity? - And making oneself useful (rather than spreading viruses	2	1	Nothing hopeful but in English
927	Well I mean if they're truly your friend then you aren't. Racism is rooted in a deep prejudice and hate towards someone of a different race. If you have a hate for someone can you be friends with them? I didn't think so. I have MANY black friends. This makes me.. not racist!! Because if I was truly racist I wouldn't associate with them and keep to my fellow whites. You guys need a dictionary some…	0	0
928	in Gods eyes all life's matter	0	0
929	A queen to the LGBTQ Community!	0	0
930	All lives matter - Crowd	0	3	Seems like an opposing comment to 'Black Lives Matter' and isn't actually intended to be hope speech.
931	I want to meet the little asian kid she is absolutely amazing	0	0
932	We all need to be not RACISIT	0	0
933	I want to add that this is highly inspiring to that choice.	0	0
934	i hate how people think they don't fit in simply because the others in a group are not the same sex	0	0
935	river that’s how I used to be and then I realized I’m a FLAMING BISEXUAL	0	0	Not making sense as a statement.
936	All Lives Matter!!!! There are two races	0	3	Seems like an opposing comment to 'Black Lives Matter' and isn't actually intended to be hope speech.
937	Since when a LIfe was defined by the colour of the skin of it´s Holder?... in this society everyone can live the LIfe they envision...Morgan Freeman and Denzel Washington are examples of this Claim	0	0
938	I love this video a lot. So inspiring. I wanna be a computer engineer someday but i don't like math and science but I'm not bad at it. In fact my grade ranges from 91 and up in both areas. They say i just need practice to be really good in it	0	0
939	I'm as straight as a circle lmao. I'm 12 and haven't come out to my parents yet because I know they wouldn't support me and our relationship would be ruined but I can't just pretend to be straight... I'll probably come out in a few years or so I guess but I know my parents won't send me to conversion therapy thank god. btw I'm pan anyone else or just me???	0	0
940	All lifes matter.	0	3	Seems like an opposing comment to 'Black Lives Matter' and isn't actually intended to be hope speech.
941	@fapnawb Why not band together and fight all racism at once... peacefully.	0	0
942	His story made me cry. Its so sad this still goes on these days. ‍	0	0
943	Thank you for sharing your story Marcus x	0	0
944	Beatiful!!! It was inspiring for me	0	0
945	I saw this 2 years ago and this deadass inspired me to go into software engineering. Currently in my second year	0	0
946	Don't give your imaginary friend in the sky credit for her hard work. She is working to change the world	0	0
947	Did you not watch the video lolnnWhat the fuck is up with you people who don't watch the video - SHE'S A FUCKING ENGINEER so it's NOT IMPOSSIBLE BECAUSE SHE ALREADY IS ONE. I swear you'd only think something was impossible if no one has ever done it	0	0
948	@Абдуллаев Антон I respect and love your nation very much. Very chill and open minded towards the stupid western media.	0	0
949	@Jeremy Stone Agreed. She really should have gotten it first. Bill Clinton certainly did advocate for LGBTQ rights but not until much later. Madonna was doing it long before it was fashionable.	0	0
950	Noice! I'm bi too.	0	0
951	Even the most remote part of our places here when they see Madonna picture or hear her song you can see inspiration and it radiates from her.	0	0
952	@Anna ._. hmm never thought of it that way you could be right I'll have to so some research but my point still stands it never says in the bible to hate anyone for any thing	0	0
953	Sonic Neverslow Clearly you are not getting what I’m saying. She does not agree with their sexuality not EXISTENCE. Sexuality and race are two completely different things. I support the LGBTQ community but I still have a sense and understanding that not everyone supports it. But as long as they respect those people and are kind	0	0
954	some people r differnt and thats ok and love is love and my church has a pastor and allmost every body is part of a LGBTQ+ and i think and am bisexul and thats ok sooo what i am saying is that love is love and deal with it. and god would not make us if he knew we where going to change btw i am olny 10 so this is very hard to wright so thx	0	0
955	@baily my dog hahahahaha GEYHN vakhsnzolstu eyne tsibele mitn kop in di drerd fis farkerth sthik fleysh mit tsvey oygen mitn seykhl in di tokhes krepatzn gornisht!!!!!nSHALOMGEYHNGEZINTERHAYT	2	2
956	All lives do matter .....we are all human beings after all.	0	3	Seems like an opposing comment to 'Black Lives Matter' and isn't actually intended to be hope speech.
957	@coolasice54321 Of course all lives matter	0	3	Seems like an opposing comment to 'Black Lives Matter' and isn't actually intended to be hope speech.
958	I recently switched my major to computer science	0	1	Neutral statement, nothing hopeful.
959	God gave us a choice. And my choice is to love.nnn...Wow.	0	0
960	Why the hell does skin color matter so much anyway. I had hoped that people had moved beyond this.	0	0
961	What about people who actually like engineering? And want to make a world a better place?	0	0
962	ALL LIVES MATTER - no one person or race is better than everyone else!!! Truth!!!	0	3	Seems like an opposing comment to 'Black Lives Matter' and isn't actually intended to be hope speech.
963	There is only ONE race. The HUMAN race.	0	0
964	Will nutsnThere good people and bad people . All life matter	0	1	Hard to understand the statement nothing clearly hopeful
965	All lives matter EVERY LIFE..... we are all here to live together with respect to each other PERIOD!	0	3	Seems like an opposing comment to 'Black Lives Matter' and isn't actually intended to be hope speech.
966	That one girl whos like I do not agree with homosexuality. nnnGirl you got a short haircut the bottom of your jeans cuffed a sweater and its bergundy ish. Your not any part of Lgbtq thats a lie. You dont agree with Lgbtq people thats a lie. You probably said that because your family and your church are watching. She will come out in a few months or years. Btw people hating Lgbtq people and they a…	0	0
967	PEOPLE matter. We need to not care about skin color. As MLK said	0	0
968	All lives matter that's it. Move on now.	0	3	Seems like an opposing comment to 'Black Lives Matter' and isn't actually intended to be hope speech.
969	This video is so inspiring because im goin to study to becomr an enginner	0	0
970	when i was young i always took my brothers legos and cars and built things i hated barbie dolls. I never have felt like the other girls i am really considering engineering. I always threw the dolls and such away i think im finally realizing this field exists. Thanks to women like you.	0	0
971	I'm a guy and I played Barbie doll when I was a kid. But I chose electrical engineering to be my major while I was in college. And now I'm a engineer. Hahaha. I still think Barbie dolls are pretty. What's wrong with guys playing Barbie?	0	0
972	Nycn lovesnCARLOS LEONn & MADONNAnDONNA CicconennDAKOTAnAPARTMENTSnnCENTRAL PARK WESTnNyc	2	2
973	@TheCounterpointer Funny. Typical misogynist. You say feminists are stupid for thinking there's discrimination against women in stem fields just because women make up such minority but then use the same statistics to make a point how women being minority in some fields means they're biologically inferior or not capable of doing something and you just assume men are better at everything.So hilario…	0	0
974	Great talk! Very inspiring. I'm in the minority too. I'm women and got my major in computer science nearly 20y ago and work in sw engineering.nGo girls go!	0	0
975	Satanic Kabbalah witch. Trying to bring in the new world order.	2	1
976	Brave compassionate man and role model right here. Much respect.	0	0
977	Conversion therapy= brainwashing	0	0
978	Very inspiring! Thankyou!	0	0
979	You cant just assume their sexuality. Its just really wrong to assume something about someone. Like everyone thinks girls with short hair are lesbians or Bisexual people cuff theirs jeans. Im bi and i don’t cuff my jeans. Dont be so stereotypical. Thank you.	0	0
980	Can people please stop saying Annie should “come out of the closet” or she is in for a “rude awakening”. Like really guys?! Dont judge her off of her appearance! You are going off of stereotypes	0	0
981	I don't care about the color of someone's skin... I dont care if your black	0	0
982	I can proudly say that I became a professional software engineer some months ago. nI've never thought that I was going the wrong way. I do have hardships now and then	0	0
983	I think this is so biased hiho. Honestly way too biased to be represented in this way to kids. Not fair. nWhat he said ‘“religious people don’t like gays” is so wrong. The people who believe in the God of the Bible love Gods creation. We love gays just as much as any sinner. We believe it is one of the many sins that seperate us from God.	0	0
984	Inspiring the next generation of Femgineers?	0	0
985	THIS IS racest! There saying that black lives matter but what about ALL lives? What about the white people? ALL LIVES MATTER no matter what color!!	0	3	Seems like an opposing comment to 'Black Lives Matter' and isn't actually intended to be hope speech.
986	We are all of the same race ... the human race ......	0	0
987	All lives matter and how. Because when we stand before out maker we will answer for every life every soul we. Pass and mistreat . Whole wor k d going to hell in a hand basket grandma use to say. Be prepared to answer for those you hurt or mistreat or lead astray.	0	3	Seems like an opposing comment to 'Black Lives Matter' and isn't actually intended to be hope speech.
988	This comment is amasing .Wishing you more happiness sir and to continue to inspire dreams and aspirations in the minds of these young children.	0	0
989	this inspires me so much i have so much creativity i would love to share i love art i’m just not the best at math and i don’t want that to stop me like it didn’t stop you	0	0
990	Thank you so much for what you are doing and for being brave and determined.nnI'm a female engineer and an artist and I've experienced everything that you've described. One of the hardest things for me is struggling with being a real girly girl and a really good engineer. The line I don't fit in really resonates.	0	0
991	The child who said “I choose to love” is so precious and enlightened! I hope more people are like them!	0	0
992	She's also got every right to her own opinion. She is a child. And she may not even be sure of what she's saying. Leave her alone.	0	0
993	I’ll never understand when someone says they “don’t agree” with homosexuality. It literally has NOTHING to do with you. There’s nothing to “agree” with. It just is what it is and always has been.	0	0
994	I am anxious to see if my 10 year old daughter will watch this with me! STEM toys are her favorite	0	1	Personal story, nothing hopeful.
995	Her story makes a Bold claim. Thanks for the jewish perspective on engineering. Building from a skill set. Lego builds infrastructures. TECH programs protecting intellectual property. Creating a new path. KICK STARTER right on. GOLDIE BLOCKS. Girls let's get it. Write on girl engineers	0	0
996	All Lives Matter.	0	3	Seems like an opposing comment to 'Black Lives Matter' and isn't actually intended to be hope speech.
997	This is fantastic. Can't wait to show it to my 10 year old girl!	0	0
998	I was lucky to have parents that let me play with construction toys	0	0
999	Exactly. You can't bring gender equality by just focusing on one gender. It's absurd.	0	0
1000	I know there is some sexism in the workforce and there is no doubt about that. But the thing that i hate is that these people are basically saying with all these stupid percentages that men need to change and help women into engineering and men are the problem that there aren't really any women in that field. And that is completely wrong the main reason that there aren't any women in engineering …	0	0
1001	Guys All Lives Matter So Stop It Because That's Selfishness	0	3	Seems like an opposing comment to 'Black Lives Matter' and isn't actually intended to be hope speech.
1002	game developer im a game player can i play with you? give more life in any game =P..!!	0	1	Doesn't seem like an encouraging statement.
1003	If it wasn’t for Truth or Dare I wouldn’t have “come out” unashamed and proud like I did. Madonna and that movie enabled me to be me from the start and save lots of time self hating. Thank you	0	0
1004	All lives matter!!! ridiculous to think otherwise!!!	0	3	Seems like an opposing comment to 'Black Lives Matter' and isn't actually intended to be hope speech.
1005	If white person says white lives matter -- he (she) is a racist. If black person says black lives matter -- he (she) is a fighter for civil rights. What a nonsense!	0	3	Seems like an opposing comment to 'Black Lives Matter' and isn't actually intended to be hope speech.
1006	It would have been nice. I'm a female engineer but no work will take me in! So	0	1	Without context, just a neutral statement.
1007	I remember when she performed cpr on me after rescuing me from the water	0	1	Neutral statement, doesn't seem encouraging.
1008	@ZERO THE FOOL i'm not very religious. Plus listening to a different point of view is nice. I don't want to live in an echo chamber.	0	0
1009	As a straight person i think Conversion ' therapy ' is a lode of rubbish. God made you different and you need to love yourself because of that	0	0
1010	EVERYONE SHOULD RESPECT HER. SHE IS A TRUE ARTIST	0	0
1011	A lot of you are writing how that girl is going to suddenly realise like you did that she isnt straight etc etc because of the way shes dressed and stuff but regardless if thats true or not its rarely easy to come to terms with your sexuality especially if youve been raised to be against it. People saying this about her is most likely going to make her feel uncomfortable and upset. And while yes …	0	0
1012	I was inspired as a women to believe in myself and be a strong independent women. I was raised with no encouragement and to be powerless. She rocks 🤙 OMG nearly cried to her comment at the end ‘never give up’	0	0
1013	All lives do matter though...	0	3	Seems like an opposing comment to 'Black Lives Matter' and isn't actually intended to be hope speech.
1014	Just ignore racism. Dude please educate yourself.	0	0
1015	“All lives matter” ... because we all need peace	0	3	Seems like an opposing comment to 'Black Lives Matter' and isn't actually intended to be hope speech.
1016	God gave us a choice and my choice is to love .....im crying	0	0
1017	I think she’ll come out one day	0	1	Neutral statement or personal opinion.
1018	I don’t believe in god but when the kid said “god gave us a choice	0	0
1019	I think this is my new favourite Madonna interview... thank you for holding my hand through some of the worst of it Bless you M !!	0	0
1020	She is not and never has been afraid to speak out against homophobia because her herself us bisexual .	0	0
1021	I'm inspired. I'm a 1st year student in Mechanical Engineering	0	0
1022	NELICOPTER Ikr they always do this I don't understand why they think it's so amazing that if they work in a specific job if they're females	0	0
1023	Black lives matter is the honoured group in the same way Caitlyn Jenner was Woman of the Year.	0	3	Seems like an opposing comment to 'Black Lives Matter' and isn't actually intended to be hope speech.
1024	How can you say you don’t agree with homosexuality? It’s makes as much sense as saying “I don’t agree with gravity”.	0	0
1025	I am SO proud of this man. He came out to his family	0	0
1026	Omg. Were at the exactly same state . I hope we'll get through this.	0	0
1027	+Jonathan Mason I could also agree on one thing agree to disagree because no matter how many ways someone says something I'm always going to think all lives matter because we're all lives matter means is you matter other personal matters the world matters nobody should be treated like they don't matter when it comes down to it it's all about ethics In fairness at the end of the day isn't that rac…	0	3	Seems like an opposing comment to 'Black Lives Matter' and isn't actually intended to be hope speech.
1028	I feel like just the thought of conversion therapy even though my parents don't believe in that at all	0	0
1029	Your thinking is right and great.	0	0
1030	please someone introduce me to this man i want us to be best friends.	0	0
1031	Some of these little kids are so bright it’s crazy. I also love how kind and open Marcus was! He had a wonderful message about being yourself in general no matter who you are and I love that.	0	0
1032	The best woman that supported t LGBTTTQ forever she's deserve her award for looong Time she was recognized to fight for the human being	0	0
1033	Ik I thought she would get emotional because they would be able to relate.... but then again sometimes it takes a long time to come to terms with the “weird” feelings you feel so she may be repressing them... there’s a lot of discomfort on her face throughout the video and honestly I think she fears someone is going to “drag her out of the closet”. Growing up I dealt with that same kind of fear n…	0	0
1034	I don't really get it when ppl say they don't agree with homosexuality. Even when it's said in the most respectful way possible. Like what is there to disagree with... If you're not hurting anybody let em be	0	0
1035	All lives matter and that's it period.	0	3	Seems like an opposing comment to 'Black Lives Matter' and isn't actually intended to be hope speech.
1036	God loves everyone	0	0
1037	I’m a Christian but I agree and support homosexuality and the LGBTQ community. I understand that everyone is different and is free to believe in what they want but if you are against homosexuality because of the bible then simply think of how God would much prefer you to spread kindness than hate. At the end of the day if you don’t agree with it then simply keep it to yourself and think before yo…	0	0
1038	To say black lives matter is divisive. To say all lives matter is inclusive.	0	3	Seems like an opposing comment to 'Black Lives Matter' and isn't actually intended to be hope speech.
1039	I never thought i would but now I'm a biomedical engineer	0	0
1040	Ashton Levry I get what you're saying but at the same time why should they defend people that we say all lives matter if we're all created equal shouldn't there be all right for us to say all lives matter because honestly I think we do matter we all matter but even if you're what you're saying is true then it shouldn't hurt your feelings that we say all lives matter no offense	0	3	Seems like an opposing comment to 'Black Lives Matter' and isn't actually intended to be hope speech.
1041	I've watched this video in 2017 this is very inspiring	0	0
1042	Her speech got me through the toughest parts of my engineering student life. I'll be graduating next semester and I'm super excited for what's to come!	0	0
1043	BOTH. Black lives do matter	0	0
1044	+Lexus Fox Women in western countries don't choose to go into those fields because of lack of interest and that is due to cultural reasons.In third world countries (I live in one) engineering is not a predominantly male field.In fact I didn't know it was in the western world until I watched this video and read some stats on it.	0	1	Personal opinion about women in STEM, nothing hopeful.
1045	Animal lives also falls into all lives matter	0	3	Seems like an opposing comment to 'Black Lives Matter' and isn't actually intended to be hope speech.
1046	She saved my life.	0	0
1047	@Molly Rebekah Homosexuality is an attraction and not an act with consquences that directly affects other people and their well being. Also	0	0
1048	So true I was discouraged by men too. They arent willing to help and pick on you for not knowing stuff that they learnt by communicating with their friends.	0	0
1049	I would protect all lgbt ‍ people from those religious mean people I would hit those religious people like those who treat lgbt people in a abusive way with a Bible and yell go away religious demons	0	0
1050	These comments are funny but please keep in mind she's a human being	0	0
1051	I have always loved her and her soul. Madonna you are amazingly inspirational.	0	0
1052	I'm currently working towards my bachelor's in engineering. I'm a female and not the smartest	0	1	Just a plain statement, doesn't reflect anything encouraging or hopeful
1053	Absolutely nothing wrong at all! It's probably given you a greater ability to empathize with your colleagues	0	0
1054	I'm so sick of people telling others they cannot say 'all lives matter'. Time to wake up. ALL lives matter. Stop thinking in colors; think humans.	0	3	Seems like an opposing comment to 'Black Lives Matter' and isn't actually intended to be hope speech.
1055	I'm so happy my parents don't care if somebody is lgbtq+ I'm bisexaul and I still haven't come out because	0	0
1056	this is so inspiring!	0	0
1057	wow... this really got to me. I'm a female in highschool who is extremely interested in engineering and science	0	0
1058	I am a woman and an Engineer and I feel like I fit in just fine.	0	0
1059	He’s so brave and I think he’s great for always being honest about who he is to himself and everyone around him	0	0
1060	Never was a great fan but this does change my opinion of her.	0	1	Personal opion or belief, nothing hopeful.
1061	I was humiliated and bullied by others who believe they have sharp features but I believe I am beautiful even though I don't have sharp features	0	0
1062	God gave us a choice and my choice is to love. That was so sweet	0	0
1063	“god gave us a choice. my choice is to love.”nwhat an amazing kid	0	0
1064	We are so lucky and fortunate to have someone so smart and so dedicated to us and the cause.	0	0
1065	“I don’t agree with homosexuality” sounds as stupid as “I don’t agree with being 5’ 7.” It’s a fact about someone	0	0
1066	Let's make some mental gymnastics (it will require a LOT of it) in order to assume homosexuality can be cured. Done ? Ok. How are you going to cure someone by hitting them and make them repeat the same thing over and over again on a daily basis ? This is no therapy. There's nothing therapeutic in being hurt or brainwashed. How do we still call those... things therapies ? This is nothing more than…	0	0
1067	I’d hug this guy! And if I were at the conversion therapy Id act like Ian from Shameless and free everyone	0	0
1068	Every life on this world matters	0	0
1069	I mean I'm all for equality and all	0	0
1070	Some girls just like short hair. My god! Lesbian stereotypes are horrible.	0	0
1071	honestly I think people can love who they want to love	0	0
1072	God gave us a choice; my choice is to love. SKSKSKK THIS KIS GETS IT! It couldn't have been better said.	0	0
1073	@Eric Taylor that is the most insane comment ever!!! go and search Shankuntala Devi >	0	0
1074	Thanks for being there when no one else was!!!	0	0
1075	‘I dont agree with homosexuality but I have friends who are homosexual.’nnThat’s like a white person saying they’re racist but they have black	0	0
1076	Y2K_ you would beat someone with a book to make them believe in god? that’s what we call toxic faith. not everybody believes the same things and that’s what creates diversity...	0	0
1077	Tapiokapuddin It just means that you don’t consider it okay but you don’t care if others do and you still accept and respect them. It’s kind of like saying you don’t agree with like a politician and what they stand for or something but you don’t hate or frown upon anyone who does. That’s all.	0	0
1078	I know that homosexuality exists	0	1	Presenting a fact, rather than hopeful or encouraging statement.
1079	i came across this vid and saw her amazing speech. Im in my third year doing my degree in ME and i faced the same struggle. Thanks for the speech. It's inspiring. Thanks Debbie	0	0
1080	Me thinking about coming out	0	1	Personal opinion or thought.
1081	@Katie Rojas Just because she looks a certain way doesn't mean she's in denial or anything.	0	0
1082	I'm in my fourth year studying civil engineering and have had a very similar thing happen to me in a class where I was the only girl out of 40 studentsnIt's a lot more common then you think	0	1	Personal stance/story, nothing encouraging or hopeful.
1083	All LIVES MATTERnI believe this is true	0	3	Seems like an opposing comment to 'Black Lives Matter' and isn't actually intended to be hope speech.
1084	What i dont like about this interview is that she doesn't own being a heterosexual who supports the LGBTQ community. She is straight- children and all. But maybe she believes love is love. n.............. Either way lots of straight people liked her music as well. I wish all people the best. All lives matter.	0	0
1085	@BeeWee I don't agree with heterosexuality. Does that make any fucking sense? How can you agree/disagree over what someone IS? If you say you're straight	0	0
1086	Where is the law here? Anyone can do anything? Where is democracy? BTW I don't like the statue and I think it was bad to have it in the first place. But my question is still valid. This is not the way. This is anarchy.	0	0
1087	This is true. I don't mind so much people being surprised that I'm in STEM. I mind how some men in STEM have treated me because I'm female.	0	0
1088	OMG! I wish I could be one of the kids. I would love to talk about this! LGBTQ'S we are together! Always fighting for our rights! U are not alone!	0	0
1089	I love all people regardless of race	0	0
1090	This is surprisingly inspiring	0	0
1091	Tyrone Marcus you are so stupid. you know that the section that says that a man should not lie with a man was translated wrong and meant to say not lie with a boy referring to pedophilia. and God loves everyone. you can't say he hates gays because he doesn't hate anyone. it called love the sinner hate the sin you dumbass. you are a hypocrite	0	0
1092	She is an inspiration	0	0
1093	ALL LIVES MATTER young old black white brown god made us all cuz he loves us all that's it bottom line	0	3	Seems like an opposing comment to 'Black Lives Matter' and isn't actually intended to be hope speech.
1094	Thank you ..I'm studying engineering right now and your speech inspire me a lot	0	0
1095	All lives matter to God including the unborn. It's time to stop calling this country racist. Do you remember what color our last president was. And remember there was only one Martin Luther King Jr. Don't try to reincarnate him . God rest his soul.	0	3	Seems like an opposing comment to 'Black Lives Matter' and isn't actually intended to be hope speech.
1096	+J Brown I meant to say I don't care who Boos me because I know at the end of day I'm right it's also pretty hypocritical people sit there and complain about racism but they turn around at the exact same way our lives only matter blah blah blah all lives the way I see it racism is black and white either you think that you are better than that person because you are that color you are racist or yo…	0	3	Seems like an opposing comment to 'Black Lives Matter' and isn't actually intended to be hope speech.
1097	I really don't agree on the process he went to. I am a Christian but I don't think the Bible teaches such procedure. My job is to love on people	0	0
1098	Can we please stop stereotyping homosexual women looks? Thank you	0	0
1099	She is now she came out a few months back and I’m there for it	0	0
1100	“Sorry I don’t agree with what you are” (I know that isn’t exactly what they said but yeah) look I know they’re a kid but hopefully they’ll grow out of that mindset it’s just illogical	0	1	Seems like an argument, without any context.
1101	2018 and we're still talking about gender gap in STEM. Things are changing too slowly.	0	1	Personal stance about STEM, doesn't make an encouraging or hopeful statements.
1102	This was so inspiring	0	0
1103	All these are correct....and yes All Lives Matter !!!!!	0	3	Seems like an opposing comment to 'Black Lives Matter' and isn't actually intended to be hope speech.
1104	I LOVE LOVE LOVE THIS! nSo inspiring! I need this toy!	0	0
1105	I’m a lesbian Christian. The beginning statement	0	1	Cannot fully classify as hope speech because it is just a statement and doesn't spread any encouraging or positive message.
1106	Everyone is equal	0	0
1107	I'm tired of hearing black lives matter. I'm not against black people but all lives matter. This protesting and rioting is wrong. And I have my reasons to believe this is paid for by the Democrats.	0	3	Seems like an opposing comment to 'Black Lives Matter' and isn't actually intended to be hope speech.
1108	Religion has no place in the 21st Century.	0	1	Personal opinion about their belief in religion, not a hopeful statement.
1109	If I had to pick which is more feminist I would say the exposing American Feminism is more accurate than the 'modest' Muslim Feminism. I think society is better overall when women are more revealing than mean or at least have full liberty to show as much or as few as they want. I am not for public nudity but even as a Christian I know lust can happen in all levels of clothing so might as well let…	0	3	This statament is sexualising women in the name of feminism.
1110	I am Christian and God did not teach teach us to not love someone because of there sexuality he thought to love everyone and show kindness	0	0
1111	All lives do matter!!!! Black white brown red yellow they all matter!!!! With that being said i quit placing value on anyones life that tries to take mine nomatter what color they are!!!!	0	3	Seems like an opposing comment to 'Black Lives Matter' and isn't actually intended to be hope speech.
1112	@James Johnson nHer comment wasn't emotional at all.nIt pointed out the reality you are ignoring moron.Women get uncomfortable when they're treated unfairly and that is somehow their fault !?So instead of killing off sexism women in your world should just put up with it?n-----OK	0	3	Seems like she is trying to make a point, but it an aggresive reply, and doesn't seem encouraging in the hindsight.
1113	ohhh your story's so relatable! Don't give up! What your doing is great!	0	0
1114	There are nuff people in Istanbul who are not religious. It is quite a diverse city.	0	0
1115	@derkylos​ nobody said you can only be those two things? Of course trans people can be gay	0	0
1116	When you can't say All lives matter your racist. All Lives matter!	0	3	Seems like an opposing comment to 'Black Lives Matter' and isn't actually intended to be hope speech.
1117	ALL LIVES MATTER ........ NO EXCUSES ANYMORE ALL EVERYONE LIFE MATTERS..... TIME TO GROW UP........	0	3	Seems like an opposing comment to 'Black Lives Matter' and isn't actually intended to be hope speech.
1118	Keep up the good work Debbie. I always like to work with female engineers	0	0
1119	It does something. Emotional and physical harm.	0	1	Nothing hopeful, seems like a statement.
1120	I love the child who said “god gave us a choice and my choice is to love” I want to meet him	0	0
1121	All lives matter .Period end of sentence !!!	0	3	Seems like an opposing comment to 'Black Lives Matter' and isn't actually intended to be hope speech.
1122	Can we just agree all human lives matter	0	3	Seems like an opposing comment to 'Black Lives Matter' and isn't actually intended to be hope speech.
1123	My mom told me that if someone really believes in their religion that will except you for who you are not who you arnt	0	0
1124	I'm white to start off and I don't think saying black lives matter is racist black people never said white lives don't matter there sticking up for there self like if your kid dies and someone comes in and says all kids lives matter calmed down people and help your fellow humans to have same rights as everyone it's not right to hate someone because of color I mean come on color wow	0	3	Seems like an opposing comment to 'Black Lives Matter' and isn't actually intended to be hope speech.
1125	EVERYONE and I mean EVERYONE has to act different when they are at work. It has nothing to do with race or sex	0	1	Nothing hopeful or encouraging, given there is not context.
1126	@Kappy @Kappy I don't hear anywhere in this video saying black lives matter too. So you are against black lives if you don't say black lives matter? So there is no other choice but agree to say black lives matter in less you want to be labeled as a bad person.🤔 You want people to support a movement that agrees with a organization that the person is against 🤔. I'm not white but I have to say All L…	0	3	Seems like an opposing comment to 'Black Lives Matter'. The intent of the person is to stop people from glorifying BLM.
1127	If we exclude women we are only getting half of the best humanity has to offer. This is why having women in tech is vital.	0	0
1128	I actually agree with her when she said it’s a cultural problem. There are countries where girls have a hard time being in STEM and countries where they are mostly completely fine. I personally grew up going to a math and physics based lyceum that was super hard to get into and we had about 5 or 6 boys in a class of 30 people. We had a blast and our gender was never an issue. I don’t know if it w…	0	0
1129	The video says kids meet...but it always feels like I'm meeting a new and a unique person..	0	1	Nothing which makes it hopeful
1130	How can you be surprised that people are surprised that you are an engineer in the same video that unbiased shows that only 10% of engineers are females?nnThat means that your colleges are right to ask you if you are one of those mythological unicorns. There is literally 90% chance you're not.nnAlso you want more female engineers? Good. Me too. Society too. Don't preach to men how they're not rea…	0	1	Someone's opinion nothing hopeful
1131	I’m the only girl in my family and i’m a milddle child of two boys so as a young girl my brothers didt want to play with barbies so we would make lego houses and make little towns. I’m noticing now as a teen that it really has affected the way I think and solve problem. This is a dank ted talk	0	1	Nothing particularly hopeful, only a personal incident
1132	It’s racist to say black lives matter it’s correct to say all lives matter nBlack people are not the only race that has poverty what about all other races if you are a minority you get free stuff like government assistance free school opportunities if you are Caucasian and poor to bad there’s no help for you maybe we should take a look at that	0	3	Downplays the black lives matter movement
1133	hi the comment was about love.... not about if it’s a sin or not. We are all sinners and god still calls us to love one another. Just because someone sins	0	0
1134	@Fate Kyougo I never said or implied that I was better than anyone. My commment was just to show that women can be anything they want to be. Don't assume things.	0	0
1135	All lives are what you make of them. nWe are all born and we will all die	0	0
1136	I don't believe in lying about yourself to make other people happy. Spot on!	0	0
1137	Every Life Matters	0	0
1138	I feel sorry for her being raised in that kind of environment.	0	0
1139	It should be all lives matter	0	3	Seems to be saying the slogan should only be all lives matter which is often used to downplay the black lives matter movement
1140	There is nothing wrong with saying All Lives Matter.	0	0
1141	ALL Lives Matter including the Unborn !!!!!	0	3	Could be in the backdrop of using all lives matter to downplay BLM. The focus on unborn can be seen in the backdrop of the reproductive rights movement in the U.S.
1142	Love u Marcus! Thank you for sharing your story!	0	0
1143	Can y'all please stop putting labels on a child? It's her life	0	0
1144	Why do people say god hates LGBT people when his whole thing is loving everyone	0	0
1145	Yo for real why do all of you guys care so much about what her sexuality is gonna be? Because she has short hair and wears cuff jeans? A lot of people wear cuff jeans and have short hair that aren't LGBT+. I'm okay if she does become LGBT+	0	0
1146	Everyone is adoring how that one kid said 'god gave us a choice and my choice is to love'	0	0
1147	I don’t understand people say I don’t agree ... it’s like I don’t agree that cats purr .... or I don’t agree that the sky is blue .... it’s f weird !	0	1	Nothing hopeful, just a statement
1148	Please protest safely	0	1	Just a statement
1149	The word survivor is kinda being over used/miss used. When I think someone survived something I assume they almost died. I know conversion therapy is terrible	0	1	Nothing hopeful, just a statement
1150	In the eyes of God there is no color	0	0
1151	Diana finally an opened minded Christian thank god for you. We need more people like you in this world.	0	0
1152	What is wrong with you people? nThese are kids. You are all sick	0	1	Doesn't seem to be hopeful rather a statement exhibiting the writer's disgust towards something
1153	We are so lucky and fortunate to have someone so smart and so dedicated to us and the cause.	0	0
1154	It's good that YOU think ALL lives matter	0	3	Can potentially be underplaying that the Black Lives Matter movement due to the use of capitals and the sarcastic vibe
1155	Actually my best friend is bi and she is in love with my other friend and she's pretty so I see why she likes her!	0	0
1156	“My choice is to love” my soul just sobbed there. That kid is so cute	0	0
1157	All lives matter includes black lives ...	0	3	The ... at the end seems to downplay the black lives matter slogan. This is because all lives matter is often used to stop black activists from talking about atrocities faced by black people
1158	@Maggie Paul my heart is not full hatred ibam not a racist person I am black my self the naacp is honestly not need anymore it ain't the Jim crow era black were truly oppressed black peot are not the only racial or ethnic group that experience d disadvantages all live matter want to figh for that basic human right that no human being should experience racism and discrimination or should be killed…	0	0
1159	Very thankful hes okay and living his truth today	0	0
1160	This was so empowering and thoughtful. It's so incredibly inspiring how enthusiastic she was and how she was never willing to give up. This really shows us how good things take time. It takes rejections and hard work. It takes staying up til 3 in the morning. That's when you make a difference. I hope whatever you're working hard for is a success and don't give your hopes up no matter how challeng…	0	0
1161	Watching this video just made my day. I'm planning on being a software engineer and was scared about how hard it is and how girls can't be in that field and all that. But right now	0	0
1162	I totally agree all lives matter	0	0
1163	chloe a. but wouldnt it be better to let other believe what they believe in and not force them into something theyre not?nnI'm a bisexual christan	0	0
1164	Wtf is conversion therapy?!! If someone just born like this	0	0
1165	This is absolutely amazing. I can't express enough how much good this attitude is doing the world.	0	0
1166	I am really glad that Imanaged to see this video. IT's nice to know that engineering is not only for nerds and geeks. It's for anyone who would like to put some effort.	0	0
1167	You can atleast inspire little onesnnnnNot just women nBut for allnYou dont seem do care about equality	0	0
1168	She saved and changed my life. Love u my Queen.	0	0
1169	All the best sis. Prove yourself . Follow your passion	0	0
1170	Joannot Fampionona That's changing the definition of violence completely.nnAnd about those cases these women present they sound to me like exaggerations made by them. What do you do? everyone gets ask that not only women. And being surprised that someone is an engineer is normal	0	1	Nothing particularly hopeful. Seems like a response instead
1171	@TheLegend27 Is Alive Funny because I'm bi and I came out to my church-- but they didn't mind and actually encouraged me to come every Sunday? They even said not to feel discouraged by it. Hm. But believe what you want	0	0
1172	80s baby here. Madonna was made by the lgbtq community. She was there for them	0	0
1173	@Sasha Dumse Clearly he also made the man and man to love each other and female and female to love each other.	0	0
1174	We all bleed the same. Stop with the Radical Fascist Liberal Left Political Pandering. ALL LIVES MATTER. We are all created by one true God in his image. We need to stop with all the hate. Period.	0	3	The emphasis on liberal and left politics in the statement indicates that the statement is highly likely to have come from a conservative. The All lives matter slogan used in that context was often used to downplay the black lives matter slogan
1175	@Pratibha Shetty yes great one I no what it takes to be an engineer......I am also a female mechanical engineering	0	0
1176	Good!! That's real woman empowerment keep it up	0	0
1177	@farhmie rou I'm a chemical engineer from South America. What I've learned in my college years is that to earn your degree you don't /need/ to be that smart (though it certainly helps)	0	0
1178	All human life matters has I’ve said before politics is responsible	0	0
1179	It's very special to understand the real meaning of life. This flower is for u madonna	0	0
1180	This inspired me so much. As a CS major	0	0
1181	All lives matter ....if they’re a good person!!!	0	3	The condition at the end can be interpreted as some lives do not matter especially if the society views them as bad people (even if they're not)
1182	It's controversial because you don't actually believe all lives matter	2	1	Just a statement
1183	Don't change because they don't like you.nChange because you want to.nn-(Don't really know if this is an origin quote..)	0	0
1184	there's a fine line between disagreeing with them and being against them. she literally said she's alright with lgbt.	0	1	Nothing hopeful here. It seems like a response to someone
1185	Like this comment to support nBlack lives matter! nWe will and should live as equals we look different but we should be treaded the same black or white boy or girl we are all humans so protest fo what is right or you can fall and be stone hearted for as long as you live and remember god made us all as equals.	0	0
1186	bachelor of science in civil engineering currently on my sophomore year and tbh	0	1	Just a statement
1187	I saw this video 4 years ago. And now Its my last year of civil engineering. Thank you	0	0
1188	I gave my niece a set I'm hoping to inspire the next engineer in my family.	0	0
1189	@samara k I agree with you 100% except I don't believe in God. I find it frustrating that a lot of people think that homosexuality is a sin	0	0
1190	Well people out there in America all lives MATTERS	0	3	Could be in the backdrop of using all lives matter to downplay BLM
1191	Thank you Madonna from the bottom of my heart...you truly are an admirable and inspirational human being.	0	0
1192	That's it.nnAll lives matter no doubt	0	3	Could be in the backdrop of using all lives matter to downplay BLM
1193	This is the best vid in this channel. Marcus was so good with these kids and the kids were open. Even Amy when she said that she was open to it. I hope that Amy changes her mind eventually	0	0
1194	All lives matter I don't care what color you are I don't care what race you are ALL LIVE MATTER!! If you cannot see that and agree with that then YOU are the problem!!	0	0
1195	We all cannot dismiss the influence she has had in the progress for change in LGBTQ rights	0	0
1196	She saved me many times at different parts of my life	0	0
1197	I was going for brainless	0	1	Nothing hopeful
1198	If GOD VALUES ALL LIVES THE SAME AND THEN YES BLACK LIVES MATTER	0	0
1199	I’m going to cry I went through such a similar experience and I just hope all people can take away from this is to really actually treat people how you would like to be treated and be kind	0	0
1200	Through all the years her music got me through some tough sh*t ....I will always be grateful 🧡	0	0
1201	He would be so disappointed. Remember I have a dream to live in a world where my four children will be judged by there character not by there skin color. Then black lives matter happens and all lives matter is racist apparently and freedom of speech is dead. You disagree your racist or sexist. What happened to the world. There's only one race the human race. History is not perfect from any perspe…	0	0
1202	It irritates me when people say they don't agree with another person's sexual orientation or that it's a choice. She is obviously ignorant and needs to educate herself and learn that it's not her place to decide anything about another persons sexual orientation. Her job is simply to love	0	0
1203	All lives matter. Everyone should be equal rights. But the world is broken.nAnd not every life is valued	0	0
1204	THIS WAS VERY INSPIRATIONAL TO ME	0	0
1205	Saying all lives matter takes away from the movement. All lives are supposed to matter	0	0
1206	Black lives matter is the most racist statement I've ever heard in my LIFE !!!!!!! can you imagine if we said White lives matter	0	3	Could be in the backdrop of using all lives matter to downplay BLM
1207	If you strip your skin covering you all look the same.All lives matter	0	3	Could be in the backdrop of using all lives matter to downplay BLM
1208	ada Figueroa Too right!	2	2
1209	Maddona saved my Soul in 1999	0	0
1210	@Pho King we are all God's children.. So to me every single precious human beings life is important.. So to me it will always be 'All Lives Matter' nPeriod	0	0
1211	¨god gave us a choice	0	0
1212	They should say Black lives matter too.nI agree with you that all lives matter but it fails to point out that black lives were not equal in value to whitesnbased on history. Sadly	0	0
1213	Same! I have found my people Baptist and bisexual	0	1	Nothing specially hopeful here
1214	My grandma was in the military. My aunt is a doctor. My mom is a University professor. My older sister is an architect. I want to be a video game developer. I'm so proud to be in a family of intellectual and accomplished black women.	0	0
1215	My grandpa was an engineer and he bought me my first LEGO set at 7 years old. 13 years later I’m more than half way through my ME degree.	0	0
1216	It’s really stupid... my friend’s parents threatened her with conversion therapy.. her dad is a pastor and found out 2 weeks ago..	0	0
1217	Her eyes are so beautiful. Very striking. You can tell this is very heartfelt and emotional and genuine. She has become very soft spoken here and it says much to the love she has in her heart for the underdog and those who suffer. Wonderful Madonna.	0	0
1218	I feel so sorry for this person... he seems so lovely ;( I’m so sorry to anyone out there who is going through this torture ;( if you wanna talk about it leave a comment	0	0
1219	Thats Madonna how i love to hear! a real fighter!	0	0
1220	Conversion therapy should be illegal. Doesnt it go against the protection of natural rights?	0	1	Nothing hopeful, someone is raising questions
1221	That is what black lives matter protesters are trying to say. All lives matter	0	0
1222	All Lives Matter	0	0
1223	My mother worked as a petroleum engineer in the 70s-80s and finds the notion of today's women being discriminated against in engineering quite humorous.	0	1	Using someone's anecdotal evidence to downplay discrimination against women
1224	Don't worry if people don't like who you are. They are still struggling to even like themselves. Hate and resentment towards other people is like taking poison and expecting the other to die.	0	0
1225	“God gave us choice. My choice is to love.” That was amazing.	0	0
1226	I loved every word she said	0	0
1227	I think he handled that very well in a way that made it both very real for them while keeping it within what they could handle. Well done Marcus!	0	0
1228	Do you think that God is going to think that black lives matter If you have it right with him all lives will matter	0	3	Could be in the backdrop of using all lives matter to downplay BLM
1229	My friend came out of the closet to me	0	0
1230	@Shannon Smith Now now freedom of speech is a right in 2dats society	0	1	Just a fact in most countries
1231	I am an 8th grade girl and I want to be a Biomedic engineer	0	0
1232	To make change ... all lives matter... if we’re going to make a change let’s make a change rate across-the-board and that includes animals to aborting babies ...	0	3	Could be in the backdrop of using all lives matter to downplay BLM and the fight for reproductive rights
1233	You can't choose your sexual orientation...nbut	0	1	Nothing which makes it hopeful in particular
1234	As a woman studying engineering	0	1	Just a statement
1235	@cassie andrews or maybe love them for who they are??	0	0
1236	I've never been a fan of Madonna's 'music' nor do I like her personality but I do love that she has been a great friend to the LGBTQ community. Also	0	0
1237	E92Dave is what your comment is	0	1	Just a statement
1238	All lives matter end of story	0	3	Could be in the backdrop of using all lives matter to downplay BLM
1239	It’s good that you got a strict religious type to voice his opinion and he was polite about it. Throwing abuse at people who think differently never works but with open discussion the more enlightened thinking often wins through	0	0
1240	Thank you Madonna you're by years an inspiration and an openminder knight.	0	0
1241	I'm having doubts these past months about pursuing Civil Engineering because I also feel like I don't belong but then I came across this and viola! This kept me back in track. This made me remember why I pursued Civil Engineering in the first place. Thank you very much.	0	0
1242	All lives matter. Especially children lives matter THE MOST. End child trafficking!!!!!! End wars!!!!!!!! End hunger!!!!! Children are our future! We need focus on them!	0	0
1243	I don't understand when people say they don't agree with homosexuality	0	0
1244	I'm so thankful that growing up I had those construction toys to play with when I was young. It's amazing that you've inspired such young girls to become excited about building things and learning about engineering.	0	0
1245	@starrynight0621 Not everyone is supportive of my choice and I've lost some friends because they don't believe I can do it. It's great though wish I had friends like yours!	0	0
1246	That kid that asked for tips on how to be a good friend is an incredible person. Wonderful. Take that and go far kid. You have a beautiful life ahead of you. You'll always be loved 🧡	0	0
1247	im glad they got a male perspective to balance the discussion... dafuq. you know how much easier it is to get a job as a woman. they want to hire 50% women when theyre 20% of grads. how is that equal for a generation thats been taught woman can do anything as good as men. it should be about ability not genitals. i totally agree on that point.	0	1	Seems like a rant and the first line is seems to be a quote from the original post to which this post is responding
1248	Racism is an individual trait. Dont impose racism to a certain group. Obama won two times because of white votes. Just because a certain number of individual showed something wrong you can say that whole race is racist.	0	0
1249	I am abhorred by what happened to George Floyd. I am white and I am not a racist. But it is clear that racists have usurped this movement. They are racists against freedom and against our constitutional liberties. These racists want to destroy everything that has been gained for blacks and for whites in this country. They want to bring tyranny and oppression giving control to the Democratic Left …	0	0
1250	Never even occurred to me that it was a boys thing. Seriously had no idea. I might be studying chemical engineering next year and I’m very excited. Every person that I have told just wishes me luck or congratulated me and is not weirded out by it. This is the first time that I’m hearing that it’s more of a “boys” thing	0	0
1251	I live in my mom's basement I was being very calm about what I said sir and for you to be ignorant with your words is immature please if you want to have a debate make sure there’s no assumptions and your only stating Facts because you assumed that I don’t care about white speakers. I’m black and the black community have been oppressed for years and we have been able to have open arms to other cu…	0	0
1252	The Nobel Peace Price is awarded to persons who Save Many Lives. I think she deserves the award.	0	0
1253	I was the girl who played with my brother's legos and ignored my barbies. I loved my college engineering classes. But I was always one of a few girls in those classes	0	1	Just a personal experience
1254	We cant be racist because there is only one race which is Humans. nnBLM just a russ that started in 2013 they always bring up the past and slavery. Were not living in the past were in the 21st century and not only black lives matter but All lives matter. You just need to becareful of what you do in life. Its your life that matters.	0	3	Downplaying the systemic violence faced by black people and undermining the black lives matter movement
1255	My AP Computer science class in high school has a pretty balanced male-to-female ratio	0	1	Just a personal experience
1256	Of course it will not work. Cannot change who a person are. Then they will only play with not to be judged But get depressed and not have a life. Some talk about the bible	0	1	Nothing hopeful
1257	OMG I love Crystal’s innocence! She is such a sweet kid!!!	0	0
1258	U can disagree yet still support someone that is homosexual. It’s her own opinion and choice.	0	0
1259	All lives do matter yes right now most of the hate right now is between multicolor multicultural differences right now its sad to have this hate towards one another im sorry but I believe all lives matter don't matter what color what gender or religion or sexual orientation now we can not ignore this hateful racism acts and violence we are humans we all have blood flowing through our veins.	0	0
1260	All lives matter all of us	0	3	Could be in the backdrop of using all lives matter to downplay BLM
1261	KEEP PEACE AND LOVE YOUR HEARTS.	0	0
1262	Boys and girls should try every type of toy so they can have a broad knowledge so they have more options when taking important decisions	0	0
1263	my parents threatened to throw me into conversion therapy for being trans but were too ashamed to. thankfully.nI'm in Canada btw--despite all our LGBT rights	0	1	Nothing hopeful rather seems like a negative experience
1264	You have to check out the trailer for imperium. all the easily offended are coming out of their hidey holes. It's sad. Just scroll through the comments and you will find cancer. it's disgusting to see people find a way to hate a movie that is purposefully being as neutral as possible while also making a statement on the world's problems. Please. I want to see your opinion.	0	1	Nothing hopeful
1265	I used to mix potions and experiment the outcome on my dolls I’m currently working on a degree in Computer Science with an engineering focus love this video	0	0
1266	I would be killed in conversion therapy because I'm a proud lesbian and I'm not gonna lie about being lesbain. Beat me all you want!	0	0
1267	Why did the police not intervene? That statue could have been removed properly without the violence that is starting to worry a lot of people. The way things are going is the wrong direction.	0	1	Nothing hopeful
1268	Nobody has supported the LGBT community like MADONNA even in the darkest hours she has always been an advocate a fighter for human rights	0	0
1269	It is a shame that we men played and continue to play such mean game dealing with woman other than your mother	0	1	Nothing hopeful, instead it seems to be misogynistic
1270	She is cool and inspiring too	0	0
1271	I always wanted to be in stem so is my brother	0	1	Just a statement
1272	Madonna has always been a philanthropist for the LGBT community.	0	0
1273	please don't give up. its worth it.	0	0
1274	I was just accepted into Purdue University's engineering school and I'm so excited! I never had any interest in engineering until I took a physics class and fell in love. Being a massive creative person this is such a relief. Knowing I don't have to give that up to be an engineer. You are such a massive inspiration! Thank you so much	0	0
1275	All lives matter to God.	0	0
1276	@Anja 18? I literally was bisexual when I was SEVEN.	0	1	Just a statement
1277	@Crystallization of the soul it's refreshing to see such guys. Most guys on these type of videos comment kitchen jokes . It's not easy for women in STEM because they are constantly told to go back to the kitchen which is exactly why these videos are needed but even then manbabies tell you that your cognitive ability isn't any good even though they themselves can't do math.	0	0
1278	If you say All lives matter	0	1	Incomplete statement, no context
1279	+Jenny Yao I am asking for 50/50 with strong protections against misandric discrimination. Males in those professions are double victims of capitalism's wage scale inequalities and also sexism against men in those professions.	0	1	Nothing hopeful, pointing out issues
1280	All lives matter no matter what color. Whats the problem with saying that all lives matter.	0	3	Could be in the backdrop of using all lives matter to downplay BLM
1281	Whoever tries to change people is messed up. nWe should learn to accept people for who they are. nIf you don’t agree with who someone is do not change them	0	0
1282	“ my choice is to love “ 🥺	0	0
1283	We are one nation under god after all.nAll men are created equal in the eyes of GOD nso people should start treating people the way they want to be treated.	0	0
1284	Ill be honest this speech did not inspire me. She made it seem like they don't encourage women to do well in engineering. As a Chemical Engineering student I have been nothing but supported by teachers and other classmates in my program to succeed and do well. The STEM field wants more women in the field... women just don't choose to be in the field. The majority of women want to be in other care…	0	0
1285	ALL LIVES MATTERS!!! AND OF COURSE	0	3	Could be in the backdrop of using all lives matter to downplay BLM besides it's incomplete
1286	Peace be upon you to our beloved brothers and dearest sisters	0	0
1287	“I think sexuality is a choice.”nnGirl if I could choose to be straight I would but-	0	1	Nothing hopeful, just a remark
1288	IT IS NOT A BOYS CLUB...SOME ENGINEERS ARE FEMALE.	0	1	Nothing hopeful, just a remark
1289	Gender Equality Paradox states that in countries the more equal the genders are in pay. The less likely women will pursue STEM Careers. Therefore the best way to increase the number women in STEM is to pay women less!!!	0	1	Nothing hopeful, infact detrimental
1290	Omg ur story is same as mine thank you for you comment and thank you so much Danby for your presentation I finally feel like I can dedicate to engineering fully	0	0
1291	Jessica Walker - “not agreeing” still isn’t the right context. Not LIKING makes more sense. When you say you don’t “agree” with something it’s as if you’re responding to someone who wants your permission or is asking for your permission to be themselves. You not liking something because of the hate that’s been imbedded inside you via a book where a man walks on water and snakes talk is YOUR perso…	0	1	Nothing hopeful, just someone's opinion
1292	Religion is between you and God. You don’t have to force it on someone OR hate on anybody because they think differently	0	0
1293	Equality is where all lives are equal	0	0
1294	This speech was really inspiring! Thank you so much	0	0
1295	It might be against my religion but I choose to love and not hate	0	0
1296	There's always a way out and Madonna is just changing the world for the better!	0	0
1297	wow its so amazing to knw about u... amazing its true nothings immposible for girls... u had givn me motivation for my engg entrance exam..	0	0
1298	All lives. Matter god created all people equal	0	3	Could be in the backdrop of using all lives matter to downplay BLM
1299	Keep working hard in what you want to do. You know you want to work with games! Look into it! Read books	0	0
1300	For Jesus Christ ALM - All Lives Matter. He died and resurrected for remissions of everybody's pre-existing sins to save from eternal hell. Accept HIM. Be saved from eternal hell. For free.	0	3	Could be in the backdrop of using all lives matter to downplay BLM
1301	@Gale Anderson I would say the reason why so many people are on welfare is for historic reasons. A lot of black families got economically screwed over from the time when they were enslaved to the 20s and even today (I know it sounds hypocritical for me to say this after my previous comment was about white guilt	0	1	Nothing hopeful, just a remark
1302	I've never been a fan of Madonna's 'music' nor do I like her personality but I do love that she has been a great friend to the LGBTQ community. Also	0	0
1303	You have the best mindset. It seems many project mental barriers which are not beneficial. Males also find their studies difficult	0	0
1304	The Amazing Atheist - Ranting about Trump - There may be some Racist groups that support Trump - but that and all the hearsay speculation does not make Trump a Racist as The Amazing atheist would have you believe. Trump is not a Racist -	0	1	Nothing hopeful, just an opinion
1305	All Lives Matter. I’m not a racist. I don’t support riots and lawlessness. Protest peacefully for change and let the justice system take it’s course. Don’t be a sheep.	0	3	Could be in the backdrop of using all lives matter to downplay BLM
1306	When i told my teacher i wanted to be an engineer he assumed i wanted to do that so i could find a guy to marry because you know the majority is guys so yeah thats sad	0	1	Nothing hopeful
1307	I feel the same way with being a pilot! I’m a women and I’m headed down the road of becoming a commercial pilot. Only 3% of women are pilots!!! I really hope to see more women join these professions.	0	0
1308	I was really about to give up on entering STEM and just go to art school. But this helped me	0	0
1309	I’m religious and bisexual	0	1	Just a statement
1310	A statue does not takeaway from him being n books and scriptures?	0	1	Just a statement
1311	Every life matters including the unborn.	0	3	Could be in the backdrop of using all lives matter to downplay BLM and in context with the fight for reproductive rights in the US
1312	Lovee thiss so inspiring...love ittt	0	0
1313	Racism is just a shit thing that came from everywhere that had 2 or more races	0	1	Just an opinion
1314	@Denise Bauer Frazier Why do we need more girls in STEM fields? Why not just the best talent regardless of gender?	0	1	Nothing hopeful and might potentially imply
1315	This made me cry it is beautiful	0	0
1316	anime. preductions im also a trans guy and I know how hard it can be to tell someone. It’s amazing that you already have told some friends	0	0
1317	Inspiring and encouraging !!!	0	0
1318	Saying all lives matter is true	0	3	Could be in the backdrop of using all lives matter to downplay BLM
1319	I pray to get the chance to thank her for keeping me alive during a very bad time in my life as a young teen!! She is a legend beyond legends!!! Thank you Madonna!	0	0
1320	Lives matter! If you nominate only one race before that statement you are the racist.	0	3	Could be in the backdrop of using all lives matter to downplay BLM
1321	@*It's Maya* did I say BL don't M...??? I am an immigrant in this country and know more than someone else what it is like to be different. But I will keep saying that ALL LIVES MATTER.!!!! ASIAN (who was discriminated because of covid BTW)	0	3	Could be in the backdrop of using all lives matter to downplay BLM
1322	Omg this inspired me so much!!! I'm applying for college this year and i'm planing on studying computer science	0	0
1323	some comments under this video honestly make me want to throw up. why are so many of you assuming that religious girl’s gender and sexuality?? i thought this community were way smarter than this	0	0
1324	Great Message Madge! Where there's life there's hope!	0	0
1325	@H Abda You're right though. People shouldn't assume her sexuality.	0	1	Nothing hopeful
1326	It's not like I feel I can not because I'm a woman I just don't want to and there is nothing wrong with that there is nothing I can not do because I'm a woman this is just not the path I want to take	0	0
1327	Charlotte Hansen I’m Christian and my job is to love everyone no matter what makes them different from me. These kids are so cute and very respectful	0	0
1328	This is really my favourite singer. She's still very strong even with all the bad things she had to fight against.	0	0
1329	@gab_vibezx I accept that you want to be equal	0	1	Nothing hopeful
1330	@Layla Rose Homosexuality can't be changed nor is it a choice	0	0
1331	S. Tagerius It is illegal now and I’m very happy! I think people should be themselves	0	0
1332	I think we should collectively agree to not label this as therapy. This is not therapeutic at all. This is abuse. Covering it up with a medical term when its not even medical in nature (hitting someone with a book is physical abuse/repeating verses meant to break your will for hours a day is mental abuse) is disrespectful to the field of medicine which serves to help and cure people. Gayness does…	0	0
1333	I grew up being supported by my chemical engineer father that taught me math with so much joy and love	0	0
1334	It SHOULD be All Lives Matter. No need to drag down/ignore other people/races to get ahead. While we're at it	0	3	Could be in the backdrop of using all lives matter to downplay BLM
1335	@Mighty Minority Confronted by what? People being surprised you're an engineer? Oh	0	1	Nothing hopeful
1336	I like how Annie tried to be respectful anyways	0	0
1337	@Molly Rebekah bruh how do you not agree with how someone is born	0	1	Nothing hopeful
1338	Cowards. All lives matter.	0	3	Could be in the backdrop of using all lives matter to downplay BLM
1339	I came out and started dating my best friend	0	0
1340	Love this so motivating	0	0
1341	The most important thing in the bible is to love	0	0
1342	This was amazing!!!	0	0
1343	Tank S. It’s not about what’s wrong with playing with Barbie dolls. She’s trying to emphasize on how girls are trained / expected to not go into the STEM field. How people think that girls aren’t smart enough for it although facts say the opposite.	0	0
1344	@tom - girl Also my other issue is as the LGBTQ community is fighting for freedom & equality they are treating anyone with a different opinion as if they've done something wrong.	0	1	The writer's opinion, nothing hopeful persay
1345	@Sasha Dumse God also said to love everyone for who they are‍	0	0
1346	I dont understand why it is up to anyone else but yourself to make the decision to become an engineer or whatever. The great thing about america or any other nation that is similar is that if you work hard you can accomplish pretty much anything you set your mind to. Obviously you need to network and some luck but saying you need to get more diversity just to get more diversity is absurd. I dont …	0	0
1347	All lives matter is better than black lives matter. All lives matter included black lives.	0	3	Could be in the backdrop of using all lives matter to downplay BLM
1348	I cried That was extremely touching. Thank you.	0	0
1349	@Molly Rebekah I´m heterosexual. Saying I don´t agree with homosexuality seems to me so weird like I don´t agree with red-haired people. Homosexuals and red-haired people don´t need your blessing or permission. You believe in your god if you want but	0	0
1350	“God gave us a choice; my choice is to love” and that folks is how to be a good Christian	0	0
1351	Hates not gonna get you anywhere in the world PREACH!	0	0
1352	Annie is honestly brave for being truthful.	0	0
1353	Im a lesbian and I have been my whole life but I came out to myself 2 years ago I am now 11 (	0	0
1354	@Sunshine littlephilly but who said lgbtq is a sin? i believe in God 100% and i think He’s really merciful so He wouldn’t send us to hell just because we followed our hearts. love is love	0	0
1355	I wanna be an engineer but I suck at math. But I like chemistry and physics...	0	0
1356	This is extremely inspiring as i'm applying for colleges now to become a chemical engineer. I really hope this sort of attention to the lack of female engineers only increases.	0	0
1357	Her speech is the reason why I have decided to give my passion a try. And yeah! It’s engineering.	0	0
1358	i literally started crying out of happiness! you go girl! the world is ready for some change and we are no longer afraid to make it.	0	0
1359	I completely understand you. This Mexican girl will keep working towards her goals though.	0	0
1360	Madonna is amazing she really is she fights for what she believes in and that awesome. I've loved her since I was really young	0	0
1361	All lives matter... I agree.nThough I'm sure some people would say that the statement also persists to the unborn with abortion... just throwing that out there	0	3	Unclear whether it's intended to downplay BLM by supporting ALM or a sarcastic comment as it extends ALM to unborns
1362	I say it all the time and I will again ALL LIVES MATER	0	3	Could be in the backdrop of using all lives matter to downplay BLM
1363	Tenacious Tacosnthere tends to be this antagonism towards women stating their point of view because it is automatically viewed as misandrist and discriminatory against men when paradigms like sexism and racism are not symmetrical because of the historical precedents where one group has been favored more than another. These scholarship initiatives are merely attempts to balance an unbalanced game.…	0	0
1364	Women have equal opportunity to succeed at STEM related fields in fact with a graduation rate much higher than men	0	0
1365	wait. 12% of them are engineers yet 28% of directives are women? A woman engineer has 2x chances of becoming a top worker than a man.	0	0
1366	As she says women have a different perspective. In a field such as engineering where innovative ideas and thinking outside the norm is so rewarded there should be a definite demand for girls to have an equal chance for an engineering career.	0	0
1367	You are right all lives matter and I'm black!	0	0
1368	All Lives Matter!!	0	3	Could be in the backdrop of using all lives matter to downplay BLM
1369	Wow! This is amazing! You are changing the world for better!	0	0
1370	I think that the homosexual people aren’t bad	0	0
1371	I pictured myself. This was so inspirational. Thank you. Budding Astronautical Systems Engineer.	0	0
1372	You can never tell on the outside unless they literally wear a shirt that says I'm lesbian or I'm a homophobe. A lot of people think I'm lesbian (I'm not but I have full respect for them)	0	0
1373	Alllllll lives matter we all came from jesus Christ	0	3	Could be in the backdrop of using all lives matter to downplay BLM
1374	I'm 23 and currently thinking of changing my career path from business into software engineering	0	1	Just a statement
1375	I find it funny at the amount of attention the lack of female engineers gets while ignoring that females are outperforming males in every aspect of school BESIDES engineering. Females have such options to their career fields but men have not had the same options opening up for them outside of traditional job roles	0	1	Speaker's opinion, nothing hopeful
1376	God bless women. It would've been so boring to live without them. I LOVE YOU GIRLS LOL. I like it so much when i see a girl fighting for her dreams and succeed despite the fact there are so many obstacles in her way.	0	0
1377	As a Hispanic woman this makes me both weary about pursuing my degree and even more driven at the same time.	0	0
1378	All lives matter because we are all God's children!	0	3	Could be in the backdrop of using all lives matter to downplay BLM
1379	I am rooting for you. Don't listen to nay-sayers. If you want to be a gaming scientist	0	0
1380	GOD GAVE ME THE CHOICE TO LOVE A child is teaching us.	0	0
1381	To say black lives matter is to say that one race is worth more than another. Racism in its basic form is the belief that one race is better than or more superior. You put a color on what matters and you are racist. BLM is just another attempt at political prostitutes trying to find new Johns.	0	3	Downplays BLM and systemic violence against black people
1382	Don't listen to the people who are trying to bring you down. If gaming scientist doesn't exist	0	0
1383	I’m a 14 year old girl and dream everyday of being an engineer	0	0
1384	I'm a 29-year-old trans man and I guarantee that I would've said the things Annie said when I was about 13 years old.	0	1	Not hopeful without context about what was said
1385	internalized homophobia is sadnhope that any closeted kid can stay save until they feel ready to come out	0	0
1386	@Molly Rebekah how tf is someone loving someone else a sin?	0	0
1387	Racism is dying	0	0
1388	I am mind blown. Thanks for the speech.	0	0
1389	Discrimination in hiring is illegal under Federal law.	0	0
1390	I'm a black american and I agree with you. All lives matter cause God would want us to say and stand by that	0	0
1391	I wonder how MANY people Madonna saved from suicide. I am not a fan of Madonna but I can understand the love between she and her FANS.	0	0
1392	In short it can't be all lives matter because black people is unfairly treated by police it doesn't mean we said blm it doesn't mean all lives doesn't matter we can't matter until they can	0	0
1393	So human lives matter would be a good slogan to fight for.	0	3	Could be in the backdrop of using human lives matter to downplay BLM
1394	honestly why can't we all just get together whether we be black or white	0	0
1395	y’all need to shut up ab annie. every girl with short hair isn’t a lesbian jesus christ	0	1	Nothing Hopeful
1396	The world is telling men to die.The Democrat party is telling men to die.Feminists are telling men to die.Hillary Clinton said WOMEN ARE THE FUTURE.	0	1	Nothing Hopeful
1397	this is what i call an inspiring video. good for you girl. im ordering one of your toys!	0	0
1398	Do not give up hope not matter what	0	0
1399	It's time to change we have to change unity make the earth/world great we're not 17st century no racism we're 21st century nunity is powerful and peaceful	0	0
1400	I’m doing STEM and we have 19 students in our class	0	1	Just a statement
1401	‘Can you give me some tips to be a good friend to my friend?’ Hold on I’m crying thats so sweet	0	0
1402	God bless u. So happy that got out of all that a stronger person. God is love. And love is love !!	0	0
1403	All lives matter all people matter all point of views matter all religions matter ..	0	0
1404	Born to be a star an icon. She has done so much for the LGBTQ community. I'm so horrified by the hate she gets because of her age	0	0
1405	All lives matter and if you think they don't imagine one of your family members die tomorrow. They may not make main stream media but they mattered to you. So yes every life matters to someone.	0	0
1406	Treat People With Kindness Treat people like you want to be treated	0	0
1407	Watching this before I study cause I'm feeling to lazy to do so.	0	0
1408	Legitimate proof to prove that conversion therapy is wrong and useless. You can’t change a person for who they are.	0	0
1409	It's so nice seeing the these comments! I'm pan myself and it always makes me so happy seeing others like me!	0	0
1410	smh atleast you got the choice i said am doing software engineering and the response i got made me lose hope before i even started anyway i rebuilt my hope and am doing it it dont matter	0	0
1411	There are only two sexes (and also intersex people so technically three sexes) but gender identity is up to the person. It’s a very western idea that there are only two genders and many other cultures believe differently and have believed differently for thousands of years. If a person wants to express their gender as something non binary to boy and girl they should have the freedom to do so. If …	0	0
1412	It's not about black lives. It's all about the tactics of intimidation by the police that sometimes escalates a situation and will lead to excessive force and generally due to the lack of cooperation by the suspect. When one's freedom is at stake one's instincts will lead to defending that Liberty and often times this is precipitated by the police officer allowing his emotions to get the best of …	0	0
1413	A lot of our children are addicted. Meth floods the streets the dealers give it out for free like candy too get addiction started plus they dust fentanyl on pot sales to get them addicted this is driving crime. We need help all of us! We have to get drugs off the street and get help to addicts. Please let's work together!	0	0
1414	Hate isn't going to get you anywhere. God gave us a choice	0	0
1415	I feel as it’s okay to not agree with something;that’s an opinion. It’s more of if you respect someone’s beliefs and she did. She said that she doesn’t exactly agree with it BUT she does still respect the person.	0	0
1416	I'm a computer science major and I know that feel. Of not belonging...	0	0
1417	Nobody ever said one life matters. Its just bringing awareness that black lives matter. Did they say ONLY black lives matter	0	0
1418	“I don’t believe in lying about yourself to make other people happy	0	0
1419	This is why I support the lgbt community because of knowing what they go through	0	0
1420	ETERNAL INSPIRATION nSHE SAVE MY LIFE	0	0
1421	All Lives Matter	0	3	Could be in the backdrop of using all lives matter to downplay BLM
1422	I’m so glad I’m in the Uk where in year 11 we have our GCSEs and since 2004 girls have outperformed boys in all subjects	0	0
1423	@lockandloadlikehell This video isn't about rights. It's about stopping the cultural idea that women cannot go into STEM because it's perceived as a masculine profession. A lot of female classmates I grew up with wer told constantly that girls can't do math. It's a cultural issue.	0	0
1424	Her eyes are so beautiful. Very striking. You can tell this is very heartfelt and emotional and genuine. She has become very soft spoken here and it says much to the love she has in her heart for the underdog and those who suffer. Wonderful Madonna.	0	0
1425	As someone who dosnt really feel comfortable saying “I’m religious” but would say my beliefs fall most closely to Christianity and attends church regularly... this whole concept of conversation therapy disgusts me. I have read the Bible through and through. Yes the Bible does say that homosexual actions are sinful. It also says a thousand other things are sinful (things we are all guilty off in o…	0	0
1426	How about more women pouring concrete?	0	1	Sarcastic remark not hopeful
1427	Change equals Challenge...nThis woman has delivered thousands of quick and witty lines over the past four decades...nBut	0	1	Nothing hopeful could be sarcastic
1428	Exactly absolute bell ends the lot of them. Disgraceful behaviour and it only goes against them and there cause. Most of these probates have been on a ten week holiday and getting 80% of there wages while doing nothing. This how they repay the kindness mindless anarchy. People laughing and cheering it's pathelic. This is massive two fingers up the nurses and doctors. Pandemic is the priority ever…	0	1	Nothing hopeful
1429	My husband is a male nurse	0	0
1430	All lives matter (we all bleed red ) there is really no difference between race	0	3	Could be in the backdrop of using all lives matter to downplay BLM
1431	I want to be like you when I grow up	0	0
1432	I grew up being taught to not make fun of any group you're not a part of. Except queer.nMy sister is lesbian	0	1	Not hopeful instead pokes fun at queer people
1433	There's a good chance the religious girl just said what she knew she had to say because she knows her community will probably watch the video	0	1	Not enough context to mark as hopeful can be non hopeful too
1434	I'd even go as far as to say all people who wants to go into any kind of STEM should watch this. While it is mainly about getting girls into engineering	0	1	Just a remark
1435	stop assuming the sexuality of the girl that disagrees with homosexuality. it's not our business to label her as queer in denial or something. no matter what she identifies with/ is attracted to	0	0
1436	All lives do matter regardless of race. Period there is good and bad people of all races. We all need to come together and stop letting the media separate us this is ridiculous	0	0
1437	I just want to make this clear all lives matters but black people aren't treated equally	0	0
1438	All life matters color is irrelevant	0	0
1439	This video was so inspiring. But now I'm in a rough patch. I'm a teenager going into my first year of High School. I signed up for Shop class but now am highly regretting it due to the amount of guys there will be and the lack of knowledge I have. I guess I was lucky according to this video	0	0
1440	I love you Madonna. I needed you so much in this life. You are someone to admire. Thank you so much for everything.	0	0
1441	Way to go Debbie! Your courage and determination are appreciated and so timely.	0	0
1442	I am a Roman Catholic. I believe that we should not mistreat members of the LGBT community. We should always treat them with respect and to love them with God’s grace and power.	0	0
1443	This video really inspired me. I'm a computer science major and I've been in the same boat my whole life. I loved Legos as a kid but people around me really pushed gender roles	0	0
1444	She saved my life and gave me a new hope	0	0
1445	God gave us a choice. My choice is to love. nWho cut the onions in here??	0	0
1446	If I said white lives matter it'd be the same thing. We all bleed one color.	0	3	Could be in the backdrop of using all lives matter to downplay BLM
1447	Every life is equal.	0	0
1448	I’m a female marine engineer ( and also graduated from a naval academy with a rank of 2nd Lieutenant- Reservist) and I used to work as a third mechanic engineer onboard very large crude oil tanker vessels	0	0
1449	Totally agree! All Lives matter!	0	3	Could be in the backdrop of using all lives matter to downplay BLM
1450	Homosexuality is something you can’t choose nor change. You were born that way. It’s not a coincidence that are always religious ignorant bigots the ones not ‘’accepting’’ a reality which is there;it always had and it always will. By the way	0	0
1451	No one like her! Thank you MADONNA! You inspire me in a world that is becoming so crazy! Never give up hope! NEVER	0	0
1452	She made me live my life and also embrace it	0	0
1453	@Forrest Cain Indeed. It's just this is one of the few times that Madonna has shown it. I like it ... she wants to be seen as just like any of us	0	0
1454	I don’t understand why saying black lives matter is really ok. It implies that all others don’t or aren’t. If I said white lives matter do you think it would be racist? If I said Asian lives matter would that be the same? Why? I understand that police brutality is out of control and needs to be addressed	0	3	Could be in the backdrop of using all lives matter to downplay BLM
1455	All lives matter includes black lives and others as well. People don’t seem to understand that. Can’t imagine prioritising one race and completely ignoring other races. No matter how small or big the situation is	0	3	Could be in the backdrop of using all lives matter to downplay BLM
1456	Apparently yeeting out of the closet means that you aren’t catholic/Christian anymore. I’m Pansexual and still a Catholic and am in a relationship with another boy. Love ya Flamingo	0	0
1457	Literally I am a mix of black and white but I don't see any difference on the colour? I only see it on the personality	0	0
1458	ALL lives matter........including the unborn	0	3	Could be in the backdrop of using all lives matter to downplay BLM and against reproductive rights of women
1459	+Roog That just goes to show that women are more interested in factors other than financial remuneration in their careers.nnHere's the thing	0	1	Just a statement
1460	Both me (I'm a girl) and my sister are currently Chemical engineers. I'm about to graduate and she's doing her senior year. Growing up I love playing with lego and making my own portable fans with simple circuits. She loves barbies and stuff animals. She is doing great in UCLA. Doesn't seem like the toys we play matters that much.	0	0
1461	All Lives Matter for me... If you protest for only 1 colour(does not mean which colour) it will created jealousy	0	3	Could be in the backdrop of using all lives matter to downplay BLM
1462	Thank you! So true! The church has done SO many awful things in God's name and been a terrible reflection of Christ. Praying the church can wake up and repent of its past and present sins. I don't blame people for wanting to stay far from Christianity. It just breaks my heart since I know the way many Christians act is so contrary to the way Jesus called us to live. He loved sinners	0	0
1463	Sunshine littlephilly ok so you have an opinion but oh my god this was a comment that I can’t leave alone as a member of LGBT I feel like this is very nOffensive we should not need to change who we are to make others happy and we will not change our sexuality or identity for anything thank you I’m just sayin	0	0
1464	I'm a bissexual conversion therapy surviver.	0	0
1465	@Sasha Dumse god also made 2 men love eachother so-	0	0
1466	I so scared I cry ever night praying my friend will be ok praying nothing happens just cause she’s not the colour of me don’t mean I not there for her she the only person I loved with my whole heart that’s not my family but she like a sister to me	0	0
1467	Exactly. ALL lives matter.	0	3	Could be in the backdrop of using all lives matter to downplay BLM
1468	Where sexism against women in the workplace does exist	0	1	Just a statement with context missing
1469	@Geek X we need to all join together ALL LIVES MATTERS	0	3	Could be in the backdrop of using all lives matter to downplay BLM
1470	@Ming Tian I'm with you sis I'm half Asian and latinos is time to stand up for our other minorities ouse they matter as well ALL LIVES MATTERS	0	0
1471	I just think love is love if you like boys you like boys if you like girls you like girls you don’t have to change be yourself I’m bi there’s nothing wrong about it	0	0
1472	“God gave us choice. My choice is to love.” That is literally the sweetest thing I’ve ever heard.	0	0
1473	If you dont want kids to understand what other people have gone through then don't watch and its not brainwashing its telling kids what's wrong with religious people who take it to seriously.	0	0
1474	stop forcing people to forcefully study engineeringnengineering is made for humans nif a girls want to study engineering she willnif she wants to study something other than engineering she willnIts totally her choice.nnnnnA person should only study something in which he/she is interested in and thus can excel in that field only.	0	0
1475	I am bisexual and I am scared to tell my parents because I am only ten years old so they wouldn’t understand me. the only one who knows this secret is Kanta/Diya she is also bisexual. she is my dad’s another wife that no one knows about except me	0	1	Nothing hopeful
1476	Ofc all lives matter..always..but right now black lives are in danger..its like..if a house is on fire..are the firefighters gonna spray every house because 'all houses matter' or are they gonna spray the house on fire?..obviously the house thats on fire..same applies for this..black people are getting killed and not being treated with justice right now so they must get the attention..to say all …	0	0
1477	All Lives Matter. Remember Jessica Doty Whitaker.	0	3	Could be in the backdrop of using all lives matter to downplay BLM. The case mentioned is still open with no verdict
1478	You cannot agree or disagree with someone’s sexuality.. Whoever truly believes you can is an idiot and that’s on period	0	0
1479	If all lives mattered there would be no poverty or killing...Matters to Who?..B.L. The Struggle	0	1	Targeting black people
1480	the real slogan should be called all lives matter	0	3	Could be in the backdrop of using all lives matter to downplay BLM
1481	+SeizmosnWhat our media spews and what the actual general population thinks and feels ain't even remotely close tho. The media is only representing the high upper class	0	1	Not hopeful and concerning
1482	i live in india...n i am 17! electronics n commuation engg...i have choosen n i am very proud!! i hope its n intresting feild!	0	0
1483	@Cindy Boa In US women are given preference over men by 2	0	1	Implies men are discriminated against
1484	such an inspiration!	0	0
1485	All lives matter. Anything else is racism.	0	3	Could be in the backdrop of using all lives matter to downplay BLM
1486	why is everyone so annoyed at these CHILDREN. like cmon they are probably not very educated in this and yall screech if they even think about the word 'choice'	0	0
1487	ALL LIVES MATTER. YES ALL LIVES MATTER.The Dems and libs are causing all of this for their own agenda. They Do Not Care At All for Black Lives or White Lives or Red Lives or Yellow Lives. ALL LIVES MATTER.	0	3	Could be in the backdrop of using all lives matter to downplay BLM
1488	ALL LIVES MATTER I AGREE NOT JUST CERTAIN LIVES OR RACES JUST A BUNCH OF CRY BABIES GET OVER IT.	0	3	Could be in the backdrop of using all lives matter to downplay BLM
1489	If it is accepted that all lives matter	0	1	Missing context
1490	after your wonderful oration about engineering i got interest in doing mechanical engineering. only because of you THANK YOU so much.	0	0
1491	TheLegend27 Is Alive also you can be christian and a lesbian	0	0
1492	I cried I'm glad my parents are reasonable with my sexuality............	0	0
1493	I'm a teenage girl and I want to become an engineer. Never have I thought it's boys' thing	0	0
1494	the boy asking for tips on how to be a good friend for his friend I'm crying omg	0	0
1495	If the really wanted racial equality they should say “ALL LIVES MATTER”.nnWhenever you have a slogan that promotes one race	0	3	Could be in the backdrop of using all lives matter to downplay BLM
1496	People need to stop telling Annie to ‘come out’nLet her live her life as a human being whether she is part of the LGBTQ+ community or not	0	0
1497	Don’t call me black or white call me by my name I’m not white I have freckles and go different colours. My name is Norman	0	1	Nothing hopeful
1498	by peaceful protests not violence or criminal damage	0	0
1499	Thank God I am that couragious and determined civil engineer. The strong hope faith and confidence that I had kept my confidence grow more and more stronger despite the difficult challenges that I faced in class	0	0
1500	Madonna is so genuine in this interview	2	2
1501	Y’all are missing the point of black lives matter. Black lives matter means equal rights for black ppl and it doesn’t mean we’re dismissing other races. If disagree with BLM your disagreeing with black ppl living in society and if disagree with that then idk what to say to you	0	0
1502	I am so so lucky to have Madonna in my life. nAfter all these years of ups and downs	0	0
1503	Can we also agree that a choice given to ONLY two people	0	1	Nothing hopeful
1504	Jack Parsons exactly	0	1	Nothing hopeful
1505	@FiberHive We all know black lives matter too. This isn't a revelation to America.	0	0
1506	I think this is amazing. Inspiring young girls! What the heck is everyone complaining about??? This woman is my role model!	0	0
1507	@seinfan9nYou are incorrect on all accounts. Women are not over-represented. She even stated that only 11% of the engineering workforce are female. How is that number over-represented? Only 20% graduate with the degree (only 20% even go into the field). Let's see	0	0
1508	Saying Black Lives Matter doesn't mean Screw everyone else who isn't black. Why don't White Americans get that?nThe fact that a group of people have to stand in protest and practically scream Hey! We deserve the right to life! because of the recent publicly exposed police brutality should be the concern here. Saying All lives matter is unnecessary and is doing an injustice to Black Americans. If …	0	0
1509	fapnawb So All Lives Matter because all race that gets affected is applied	0	3	Could be in the backdrop of using all lives matter to downplay BLM
1510	@Jodi Dunbar God has no hate in him. He is pure love.	0	0
1511	Omg I luv Madonna. She is my hero and I will always defend her against all the haters. Let’s appreciate this living legend!!!	0	0
1512	I’m lesbian and I’m so glad that I didn’t have to go through this. I’m sorry you had to go through this. I mean technically I’m only out to my friends and my Mam and brother I’m kinda scared to come out to the rest of my family	0	0
1513	Earth angel with an iron coat 🧥 she had to wear it or she wouldn’t have survived all the hate ! We love you Madonna ! We see and feel your light x but we also accept your dark as well ! For to love only one side of humanity isn’t real ! With out night there is no light	0	0
1514	homosexuality isn't something you can disagree with. Just like having red hair. The sentence I don't agree with red hairness doesn't make sense. Same for I don't agree with homosexuality	0	0
1515	And we are happy you are not giving up on us !	0	0
1516	So he saying white lives doesn't but I'll always say all lives matter	0	3	Could be in the backdrop of using all lives matter to downplay BLM
1517	All lives matter.Jesus loves us all the same.	0	3	Could be in the backdrop of using all lives matter to downplay BLM
1518	@Phoebe Reynolds You cannot change a persons sexual orientation. Period. Thats why. Its something hard wired in the brain	0	0
1519	We are all Childs of God! STOP politics divide us!	0	0
1520	People really start to suck as they grow up. The younger kids were so sweet and accepting as opposed to the older girl who's clearly in a denial mode. About herself.	0	0
1521	SHE LITERALLY SUPPORTED THE LGBT COMMUNITY BEFORE ANYBODY EVER DID. PEOPLE DON'T UNDERTAND HOW IT WASN'T COOL OR TRENDY TO SUPPORT THEM.	0	0
1522	I'm atheist and I still support and agree with the LGBTQ community	0	0
1523	I am currently a female engineering student (Bachelors Degree)....You have really moved me Debbie with your story...WoW! Thank you	0	0
1524	We don't want a race war	0	1	Nothing hopeful
1525	Why is it wrong say Either...both are right...nIF ALL lives matter...then Black Lives Matter...what is the discussion	0	0
1526	She is my new role model	0	1	Just a statement
1527	I'm in love..... with loving and i wouldn't change him	0	0
1528	@FortyFore nQueer is the short and simple way of saying LGBTQIA+. If you're queer	0	1	Just a statement
1529	God gave us a choice. My choice is to love. PRINT THIS EVERYWHERE	0	0
1530	ALL Lives MATTER...TO GOD-JESUS	0	3	Could be in the backdrop of using all lives matter to downplay BLM
1531	i love the two boys that are religious but respect lgbtq+ people	0	0
1532	Complains about stereotypes of women in STEM but then admits what the real issue is @8	0	1	Nothing hopeful
1533	Yeah all lives matter dude that includes black lives ALL means every what is it just like ofcourse every life matters besides black lives so we absolutely need to call it black lives matter to make people realize that or am I right and black lives matter is racist.	0	3	Could be in the backdrop of using all lives matter to downplay BLM
1534	@Cindy Boa In US women are given preference over men by 2	0	1	Not hopeful
1535	Bea Millan-Windorski i go by stats. women are also very family oriented so women generally want jobs with easier hours so they can spend time with their families	0	1	Nothing hopeful
1536	Oh for the love of God. ALL LIVES MATTER!!!! I will not apologize for saying this. I’m an RN for 30 yrs & treat ALL lives with empathy & compassion.	0	0
1537	She said it bothers her that people call her smart when she wanted to be pretty. I had the exact opposite complaint at that age - I wanted to be called smart instead of pretty. I am a Roboticist today with an extensive background in both software and hardware. I have friends who's parents encouraged them to go into STEM that hated the idea and felt pressured	0	1	Personal account nothing hopeful
1538	Is it true if you'll take engineering you must be good in drawing?? nAnd I want to take engineering and my weakness is drawing	0	1	Just a question
1539	I love that you guys are coming at this from a full heart and really trying to help children understand the new world that they live in today some people may be against us some people may be for it but whether you’re against learning about the way the world actually works or not doesn’t mean that the world doesn’t still actually work and if your children are going to be productive people in our s…	0	1	Nothing hopeful
1540	I swear Juan is a secret Dem	0	1	Just a statement
1541	@Molly Rebekah also. If loving someone will send me to ever lasting tormmet. Than taking that hell. J loved in love I've had it for a life time and if I had a choice thtta if I love someone I'll be sent away to hell. I'm gonna love that person with all my heart. No matter the hell I'll experience .	0	0
1542	@TheCounterpointer​​ Her comment wasn't emotional at all.It pointed out the reality you are ignoring moron.Women get uncomfortable when they're treated unfairly and that is somehow their fault !?So instead of killing off sexism women in your world should just put up with it?Oh	0	0
1543	I hate the “I don’t agree with homosexuality” argument like??? That’s like saying “I don’t agree with that tree over there. Like??? It’s just a thing that exists and can’t be changed	0	0
1544	The fact a lot of people become famous and forget who helped them become famous and Madonna did not! She basically saying the lgbtq helped me become me and in return I’m forever in there “debt.” (In a good way) and I will never forget that and will All ways help out. It’s not just saying okay I support the lgbtq it’s acutely doing something on a daily and not just during pride and Madonna shows t…	0	0
1545	If so many people hate racism	0	1	Incomplete statement
1546	SHE LITERALLY SUPPORTED THE LGBT COMMUNITY BEFORE ANYBODY EVER DID. PEOPLE DON'T UNDERTAND HOW IT WASN'T COOL OR TRENDY TO SUPPORT THEM.	0	0
1547	I remember when I was 13 years old is when express your self started to come out in the 1990's and that song from Madonna made me who I am to day. It was a song of strength	0	0
1548	The problems is that one doesn't negate the other. If All Lives Matter then what is the problem with saying Black Lives Matter or Blue Lives Matter? They are a part of the All am I correct? Not like when the constitution said We hold these truths to be self-evident	0	0
1549	All lives matter in the world!all over the world	0	3	Could be in the backdrop of using all lives matter to downplay BLM
1550	All Lives Matter!! Follow the laws and be productive citizens in society then your life will matter otherwise you put your life in danger and it will not matter.	0	3	Could be in the backdrop of using all lives matter to downplay BLM
1551	Only people can understand Madonna who has gone through so much pain as she did the battle losing her son and other emotional things	0	0
1552	Conversion therapy has the same origins as ABA. Autistic children are exposed to abuse regularly with the goal of making them outwardly act less autistic.	0	1	Nothing hopeful
1553	thanks for encouraging me to fight with dignity once again... appreciation to the tips and real life facts... Respect!	0	0
1554	All lives do matter! To say otherwise creates separation. We are one Nation under God. We all bleed red. The human race is the only race. It's time to move forward together. We all struggle and have struggled.	0	3	Could be in the backdrop of using all lives matter to downplay BLM
1555	If all lives don’t matter. Soon No lives will matter! Stop the hate! Show some love!	0	3	Could be in the backdrop of using all lives matter to downplay BLM
1556	My choice is to love perfect answer because God is Love so that's why the gospel needs to be spread through testimonies and exposing the false churches that the devil comes in the name of. 2 Thessalonians 2	0	0
1557	Better to enjoy the light before it dies than to contemplate it's death until it's to late.	0	0
1558	@Adele TA All the best dear. Work with passion.	0	0
1559	Being pro-life and pro-sterilization is not hypocritical. nnBasically you can believe that a mother shouldn't get herself pregnant AND believe that if she does get herself pregnant that she shouldn't be allowed to murder her kid.nnThis is no stranger than pro-life people advocating abstinence. They're not trying to make sure women have babies; they just don't approve of murdering children.	0	1	Just a POV
1560	Jens I’m not offended by black lives matter. The first comment in this topic was about how the slogan was racist. I went on to say that I don’t think it’s racist but I had my concerns how it could be causing a divide and doing more harm than good . nA good number of the comments on here say it’s racist so clearly some people have an issue with it	0	0
1561	I was an engineer and starting to be an 8th grade math teacher just this year at 53.	0	0
1562	ALL LIVES MATTER. .... Any thing else is racist !!	0	3	Could be in the backdrop of using all lives matter to downplay BLM
1563	God gave us a choice. my choice is to love. i teared up	0	0
1564	Debbie Sterling's lecture is so far the best lecture I have seen. I actually can relate to this cause my case is also quite similar to hers	0	0
1565	The STEM field is very diverse...the problem is the vast number of Indian and Asian women and men in STEM strangely don't seem to count? Notice	0	1	Raising a question nothing hopeful persay
1566	Sasha Dumse God made us to be kind to eachother	0	0
1567	@Cindy Boa In US women are given preference over men by 2	0	1	Nothing hopeful
1568	i'm a female computer science engineer and this was the most emotional ted talk i've ever watched! sooo important	0	0
1569	I like her creation! Keep dreaming girl!!	0	0
1570	Why Parenthood?. What is the foundation for Parenthood?. Is my concern......All life matters because our Creator created each one of us.	0	3	Could be in the backdrop of using all lives matter to downplay BLM
1571	my choice is to love GIVE THIS KID SOME PRICE FOR THE BEST SENTENCE EVER	0	0
1572	very true! Jesus said greatest of these is love	0	0
1573	@TheLegend27 Is Alive I'm a Christian and I'm Lesbian	0	1	Just a statement
1574	All Lives Matter! I believe it's not the color if your skin it's your personality. I other then in pleasant notes hair eyes dress. You can see they all see Black and /or white. All Lives matter	0	3	Could be in the backdrop of using all lives matter to downplay BLM
1575	Not really no. Women in politics are important as well	0	0
1576	I think it goes back to Women being afraid to step into a male dominated atmosphere and they are afraid they won't make any friends. It goes back to the idea that women and men can't just be friends.	0	1	Nothing hopeful
1577	Now for premise I am not American and I don't get the whole context and details of this issue but according to my research (meaning stats some from the FBI) black lives are disproportionately hurt by police brutality compared to other races	0	1	Nothing hopeful
1578	@Eric Taylor What school did you go to that actually did that? Every school I've ever been to gives girls and guy equal chances	0	0
1579	Ah... Glad this video popped out in my suggestion just in time. I am a freshman in agriculture engineering. And a female. At first	0	1	Incomplete hence just a statement
1580	I am bisexual. I came out of the closet 2 years ago to tell my parents I had a crush on my BFF. This was after I had 2 dates with boys. My parents were okay with this. I cried because I was afraid that they were the type of parents I know other people have who'd beat up their kid or kick them out of the house just for being LBGTQ. Unfortunately	0	0
1581	I wanna be a civil engineer too. You're not alone! Go ahead. You can do it	0	0
1582	@methylene5 Almost everything in kids' education is NOT gender neutral. That's the point.	0	1	Nothing hopeful
1583	All lives matter. There is so much diversity here in America and we should just respect each other. The color of your skin	0	3	Could be in the backdrop of using all lives matter to downplay BLM
1584	Trump really likes Israel. At least he says he does!!	0	1	Nothing hopeful
1585	What an inspiration!	0	0
1586	i relate to her so much	0	0
1587	ALL LIVES MATTER... the end	0	3	Could be in the backdrop of using all lives matter to downplay BLM
1588	pvz68man There is absolutely nothing wrong with LGBTQIA+ You seriously need to stfu. Because I don’t give af what a book says love is love and I don’t see how other people’s sexuality affects you. You are a small person	0	0
1589	Someone fire these people and put them in the street then let's see who lives matter then ...yall live with no money no job for just two months then see who helps you on the street ...I bet there be yellow black and white that help you ...help from all lives ..that's y all lives matter ...black lives can't do it all...neither can white neither can yellow ...it takes all lives to over come the hat…	0	3	Could be in the backdrop of using all lives matter to downplay BLM
1590	All Lives Matter. Period.	0	3	Could be in the backdrop of using all lives matter to downplay BLM
1591	All Lives Matters means exactly that. Equality for everyone. BLM only focuses and try’s to elevate 1 race. I’m Asian and we too suffer from racism - especially now with this COVID-19 situation. Racism and brutality is never right. All Lives Matter.	0	0
1592	Im a Doctor and people say arent u young for calling urself a dr	0	0
1593	Every life matters I don't understand why these people would boo that...	0	3	Could be in the backdrop of using all lives matter to downplay BLM
1594	All lives matter no matter color gender or religion bernies an effing idiot fishing for minority votes .another two faced demonrat	0	3	Could be in the backdrop of using all lives matter to downplay BLM. This is further validated by the remarks about Bernie
1595	A queen to the LGBTQ Community!	0	0
1596	GUESS WHAT feminism IS about empowering women and if u didnt watch the video	0	0
1597	Why ever bother to come out	0	1	Nothing hopeful
1598	I loved the kids' reactions and comments. I hope this next generation is a more tolerant	0	0
1599	+Wafae Stop blaming men for women's choices of not getting into engineering and computer science.	0	1	Nothing hopeful
1600	They say they want everyone to be equal	0	0
1601	Val Q where are you from? Lots of countrys still make it legal	0	1	Just a question
1602	Sadly it is being put as a trend. But black people are still suffering and they are downplaying us and trying to shut us up.nWe just want racial equality and to defund the police. It seems they are doing everything but that. But we shouldn’t use this important movement to turn attention to something else that isn’t the matter at hand. We will fight for equality then we will spread out to those re…	0	0
1603	God gave us choicennnMy choice is to lovennnnnI teared up man	0	0
1604	God gave us a choice and my choice is to love	0	0
1605	I love this. I get a little discouraged every time I go to class.I am the only girl among 110 students in my class. I am currently in my fourth year studying civil engineering. It has been an interesting and challenging ride for me. Listening to Debbie Sterling talk about her experiences gives me hope for this and the next generation of engineer girls.	0	0
1606	She’s such a cold phony. It’s great that she shows supports for gays	0	1	Can be a sarcastic remark as the person is called a cold phony
1607	This speech is so inspirational and it has given me the motivation to push myself. Thank you Debbie	0	0
1608	TheLegend27 Is Alive just because your Christian doesn’t mean you can’t be lesbian I know someone who is Christian and lesbian	0	0
1609	All life matter. That simple	0	3	Could be in the backdrop of using all lives matter to downplay BLM
1610	To the ones who think or feel... not all religious people are bad. In this case we are assuming christianity for right know. There are bad Christians no lie this is true but also a lot of Christians are kind are excepting. So be kind. I used to hate Christians because I thought they would hate me back. But I realized not all of them will hate me	0	0
1611	Conversion therapy is one of the most fucked up things I ever heard. Never agreed with it. You can't change how someone biologically feels.	0	1	Nothing hopeful
1612	That's right ALL LIVES MATTER!!!	0	3	Could be in the backdrop of using all lives matter to downplay BLM
1613	One of 'em litterally say that this will change and the only thing it will take is time	0	0
1614	Black lives are included in all lives	0	1	Just a statement
1615	@Lucas De Los santos nah that would be to take a step back. We dont want to split each other up. We have to unite in order to fix it.	0	0
1616	God gave us choice. My choice is to love.	0	0
1617	this made me cry. very inspiring	0	0
1618	Just be yourself man	0	0
1619	Yes all lives matter because we are all human	0	3	Could be in the backdrop of using all lives matter to downplay BLM
1620	you gonna make it! There are so many jobs that require engineering skills but are not pure engineering	0	0
1621	Smokey J I didn’t say I knew what color skin you had also you said I can’t throw it in white peoples faces I don’t even know if whoever wrote the comment is white and just cause it happened in the past does not mean racism just suddenly disappears. Black people are the ones that are oppressed sir but if you want to talk abt white people they aren’t oppressed so good for them! Also I’m literally h…	0	1	A response and not necessarily a hope instilling message
1622	Engineering drawing has me that way too	0	1	No context
1623	Just knowing Madonna is out there still going strong puts a smile on my face	0	0
1624	+TheCounterpointer Why isn't it possible for our society to focus on broadening horizons for women AND helping boys get through the educational grindhouse?nnI think our educational system could be vastly improved	0	0
1625	In Malaysia there are more girls in chemical engineering	0	0
1626	It's OK to be white. It's OK to be black. It's OK to be brown. ***ALL LIVES MATTER***	0	3	Could be in the backdrop of using all lives matter to downplay BLM
1627	The main cause of racism is the mentality of people	0	0
1628	bless you. i wish you all the very best. xxx	0	0
1629	Just remember that at the end of the day no matter your sexuality	0	0
1630	I nearly lost family members by saying all lives matter. Sad.	0	3	Could be in the backdrop of using all lives matter to downplay BLM
1631	@Molly Rebekah nHonestly . Think logically for two seconds. nIf you were so nice and so caring	0	0
1632	My choice is to love. I'm actually crying in the library right now. Such wisdom and maturity	0	0
1633	I think that ı was gonna cry some point that was so emotional to me as a teen girl who wants to be an engineer in Turkey and you cant know how hard it can be after this video my self confidence get stronger then before now I feel better thank you for trying this hard rather than being one of the womens working as an invisible women employee they have to get	0	0
1634	All lives matter. I have all race in my family. So sad. Jesus loves us all the same and so should you.	0	0
1635	Stop treating people of different races differently and demanding bias in favor of certain races. Duh.	0	0
1636	I'm also studying chemical engineering. I also cried when I watched this video🤧 and I totally understand how you felt.	0	0
1637	Jules is such an amazing person	0	0
1638	there is absolutely nothing wrong with lgbtq+ people and I will fight you if you think otherwise lmao🧡	0	0
1639	I wish i could give that guy a hug because he has had such a tough life and seems really nice and deserves more.	0	0
1640	It's because its nice to have big events where LGBT+ people can go and meet people who are like them or have similar experiences as them and feel at home and like they belong somewhere. There are no parades for those things because those are more socially excepted things. Have you ever heard of a country that doesn't accept a straight man? It's just a nice way to make friends or if people give yo…	0	0
1641	ALL LIVES MATTER and that includes black lives... enough said.... anyone that believes otherwise is ignorant and wrong	0	3	Could be in the backdrop of using all lives matter to downplay BLM
1642	Thank you so much for sharing such a wonderful message	0	0
1643	In God's eyes we all matter	0	0
1644	I KNEW SHE MADE GOLDI-BLOCKS! I was thinking that while she was talking about trying to get girls interested in engineering!	0	0
1645	@youshallnot pass thank you for this response bc yes some Catholics have done horrid things but that's not bc of Catholicism but bc they gave in to sin and they are bad people	0	0
1646	In general I'm inclined to believe people when they say they are being mistreated. Especially when these signals are coming constantly.nI'm not in their shoes and I can't pass judgement on what they should	0	0
1647	My mom’s an engineer. As a girl	0	0
1648	Sasha Dumse and God made LGBTQ people	0	0
1649	What i dont like about this interview is that she doesn't own being a heterosexual who supports the LGBTQ community. She is straight- children and all. But maybe she believes love is love. n.............. Either way lots of straight people liked her music as well. I wish all people the best. All lives matter.	0	0
1650	I came out of the closet to my mom about me being pansexua....she um....is kind of supportive? she still prefers if I marry a guy when I'm older tho I actually have a girlfriend rn and donno how to tell her I think she might ge the one...	0	0
1651	She literally introduced the world to the ballroom scenes. Especially in a time when homosexuality was taboo.	0	0
1652	She saved mine as well. Thank you with all my heart	0	0
1653	It appears that people have forgotten that ALL LIVES MATTER!!!!	0	3	Could be in the backdrop of using all lives matter to downplay BLM
1654	Both Madonna and Elizabeth Taylor never turned their backs on the gays.nThey were both very involved with support for research from the very beginning of the AIDS crisis	0	0
1655	These kids are what give me hope for humanity	0	0
1656	I don’t watch things that doesn’t interest me. Why this world has to be so negative. I am praying and many others are as well. Take care	0	0
1657	Now I want to be engineer	0	1	Just a statement
1658	It’s really amazing how reality changed. I recently study civil engeenering and the bilans between female and male is around 50/50 and its normal.	0	0
1659	@Yang Yang I will never respect a racist organization	0	0
1660	ALM - All Lives Matter	0	3	Could be in the backdrop of using all lives matter to downplay BLM
1661	All lives matter ....spread peace and love ....why is the left trying to divide us ....open your eyes to all young poeple rioting is not the answer	0	3	Could be in the backdrop of using all lives matter to downplay BLM
1662	I'm a STEM student and I really wanted to be a civil engineer	0	1	Just a statement
1663	She made me live my life and also embrace it	0	0
1664	It’s honestly not even a battle between white vs black people. It’s a battle between racists and people.	0	0
1665	And? Sounds like a marketing ad.nnBe what you want. No one cares. If you lose a girls STEM interest by 10	0	1	Not hopeful
1666	This is so inspiring. I always watch this when I feel discouraged.	0	0
1667	Cat Jones I do agree but I also think there are some problems with this protest such as destruction of property. That means people would see them as a threat not someone who you can reason with	0	1	Just a statement
1668	Thank you for sharing such an inspiring story of yours. I am a Filipina	0	0
1669	Sasha Dumse he also told humans to love each other	0	0
1670	If someone says to you black lives matter then you reply all lives matter that really says a lot about who you are	0	3	Could be in the backdrop of using all lives matter to downplay BLM
1671	this is so inspirational!	0	0
1672	well u have to respect her. its not wrong if someone disagrees with homosexuality but at the same time CHOOSE not to hate and keep loving the lgbtqs. there are differences.	0	0
1673	@Kamron Moore No they do it to support equality. Why should one race matter more than another. Kinda counterintuitive considering they all want equality	0	0
1674	Saying “I don’t agree with homosexuality” is the equivalent of saying “I don’t agree with left handed people”.	0	0
1675	@Belinda yes he loves everyone	0	0
1676	She's a living legend. She changed the world. Madonna u are my life!	0	0
1677	I want to be a chemical engineer soon. I hope will become in the future	0	0
1678	I know so many LGBTQ+ members. I myself am pansexual and genderfluid. Those kids are so nice	0	0
1679	I can't believe some people don't accept people because of who they like. Religion or not. The God I know loves everyone	0	0
1680	Yes all lives matter	0	3	Could be in the backdrop of using all lives matter to downplay BLM
1681	I'm a woman and I dream of being an engineer	0	0
1682	This made me tear up! (Hello from South Africa ) I hope you didn't give up.	0	0
1683	This is so good! As a woman who loved math but never had anyone suggest engineering I thank you. I have two girls and I dream of all opportunities for them. Thank you!	0	0
1684	This speech was really inspiring...it has given a great solution to my confusion...l'm clear now	0	0
1685	I've always wanted to become an engineer	0	0
1686	If I have learned anything from this woman it is that corporations dictate way too much by deciding how girls and boys should live. Don't let a corporation dictate what your child should play with as these toys influence alot. You as the consumer decide what the demand is and the supply will come. Imma share this video to somebody!	0	0
1687	This was so powerful and I appreciate conversations with kids. This is a beautiful thing that you are doing and one of the greatest conversations I’ve ever watched. Shoutout to some of the parents because the kids were pretty mature.	0	0
1688	Trump isn't anti-Semitic	0	1	Just a statement
1689	@ozzie pants nnThe reason I say I believe there could be closer to a 50-50 distribution in engineering is because there are many women who have strong enough math skills to go into the field who are currently choosing to go into other disciplines.n----I agree that women with high scores are likely to choose other majors. Female math geniuses are usually stronger in other subjects as well. Like I …	0	0
1690	JESUS PURPOSE FOR COMING INTO THIS WORLD WAS FOR MANKIND. THERE WERE DISPLEASING THINGS THAT WENT ON IN HIS JOURNEY HERE IN THIS WORLD. THERE WRE KILLIMGS OF INNOCENT PEOPLE LIKE IT IS TODAY ETC.. JESUS MISSION WAS TO BRING MANKIND BACK TO OUR HEAVENLY FATHER BECAUSE OF IN JUST THINGS WERE HAPPENING. TELL ME OUT THE SLAUGHTING IN THE DIFFERENT RACES	0	0
1691	This was so amazing	0	0
1692	this is just so sad of how people are treating black people just because of their race. I hope this ends soon	0	0
1693	I'm a teenage girl now and i'm considering electronics engineering in the future. How was it?	0	0
1694	I remember watching this when I was a fifth or sixth grader when I didn't really have a clue about what I was interested. After four years	0	0
1695	What about the lack of women in construction	0	3	Can be -ve or +ve depending on the context
1696	ELM - Every Life Matters. All else is lies.	0	3	Could be intending to downplay the BLM movement
1697	ALL LIVES MATTERS we should be in this movement not there were only there kind matters .	0	3	Could be intending to downplay the BLM movement
1698	@emmett thank you for your kind words ‍ I wish more people would understand that not every Christian is a homophobe that wants to force their beliefs onto others. And that peope don't only see the Christians speak wrongly in the name of God. I believe in a loving God who doesn't want me to be mean just because of an opinion I don't share with someone. I guess most religious people often don't see…	0	0
1699	The founder of the Toronto Pride event made a statement after pride day was over basically saying that BLM will not dictate to pride what they can or cant do. He only signed their demands to move them along.	0	1	Could be non-hopeful
1700	all live matter . key word ALL. meaning ALSO black lives	0	3	Controversial
1701	@Ashxr and we dont hate people for who they are like she said your looking at it wrong. We dont hate we just leave you alone. It simply means you do you but we arent apart of it. For example ALL of my friends are apart of the LGBTQ even my best friends and I'm christian. Just because we are straight and religious doesnt mean we are monsters we are humans too	0	1	Expressing annoyance not hope just stating an opinion
1702	this is so inspiring being a girl that wants to go into engineering	0	0
1703	God straight up says love everyone so to me that over powers everything	0	0
1704	Omg he came out to himself when he was 13 same as me omg awesome	0	0
1705	I think women and men should be treated equal but I'm sorry but if you put a man into a workplace full of girls	0	3	Not well worded can't understand what they are trying to say
1706	my choice is to love nnmy heart<3	0	0
1707	Corvus Corax that's great! Many girls have been teased for having interest in STEM. I am only 26 and when I was in grade school	0	0
1708	Why cant we enjoy the merits brought to us by engineers..why do we have to go behind the scenes everytime?	0	3	Not English, Sentence is incomplete
1709	God gave us a choice. My choice is to love	0	0
1710	@Theodore Haskins Every life matter. Every life is special	0	0
1711	All of US matter's !!!!!!!	0	0
1712	All lives are sacred..... all lives matter	0	0
1713	@xThisUsernameIsTakenNowx all lives matter	0	0
1714	Being a girl is not just about pink color and dolls and homie stuffs. It is more than that! We all are equal. Thanks for giving this wonderful speech and sharing ur thoughts with this world. I am really glad.	0	0
1715	Every life does matter. Example	0	0
1716	The Black community has dealt with many years of systematic racism and oppression. We are more than tired of it. Black Lives Matter is a movement to bring forth awareness in our community. Saying all lives matter	0	1	Not Hope pushing forward a movement and about hardships faced.
1717	Why don’t all lives matter... just wondering?	0	1	Not Hope pushing forward a movement and about hardships faced.
1718	This is for everyone i am an 11 year old female i want to be a mechanic or engineer since i made a helicopter in DT i have always been a bit of a tomboy since i was young i had poweranger action figures and loved marvel and DC and loads of action films when i was about seven a bunch of girls pushed me in to a ditch and hit me with sticks i was to scared to fight back but to strong to cry i just s…	0	0
1719	Your right about the toys. If we were given these toys we would have better spatial skills and love science and engineering.	0	0
1720	“God gave me a choice and my choice is to love” omg he was so pure!!!! I wanna raise my kid to be like that kid. Whoever his parent is	0	0
1721	Madonna educates people on many things.Shes there because she’s destined for it.She does a lot of good admirable things.	0	0
1722	The best woman that supported t LGBTTTQ forever she's deserve her award for looong Time she was recognized to fight for the human being	0	0
1723	Now i want this toy. I really needed this pep Talk as i am going to be doing a second engineering drawing module. I will work hard until i get it right	0	0
1724	“My choice is to love.” nnHi I’m Mike Pence	0	0
1725	I don’t understand how people can just “not agree with homosexuality” like it’s not something you agree with you just have to accept it because that’s just how some people are	0	1	Not hope, expressing disagreement with a certain set of beliefs
1726	All lives matter no matter what colour simple	0	3	Could be intending to downplay the BLM movement
1727	I started crying when she quoted the mom who said You can be anything. So many people do not realize how important it actually is for girls to believe that	0	0
1728	God created all humans	0	0
1729	she changed my life	0	0
1730	I'm am fortunate to live where I do. If you contribute and act as a decent person you are treated equally the same. Regardless of race religion etc. Knowones life here is undervalued. Not even the sorry people of all colors.	0	0
1731	If all lives matter to God	0	0
1732	“God Gave us a choice my choice is to love” nnnnYo watch out he gonna be a king	0	0
1733	And we are happy you are not giving up on us !	0	0
1734	Why would people go way within 2 meters in lockdown as it was easing and the r was below 1. More lives will be lost.	0	1	Not hope, rhetoric question
1735	Omg conversion therapy should be illegal	0	0
1736	Madonna has been an advocate from day dot. She fought so hard for and with LGBT people. She is an icon and a legend in every sense of the word. Her heart is so pure	0	0
1737	Now stop this protesting because we are all equal. My best friend is black and even she says all of this is blown out of proportion. Yesterday in the U.K. I seen 2 black police officers dragging a white man across the pavement. You don’t see me recording it shouting at them saying there racist. There doing there job	0	0
1738	Madonna has been an advocate from day dot. She fought so hard for and with LGBT people. She is an icon and a legend in every sense of the word. Her heart is so pure	0	0
1739	They are just saying what people want to hear for the vote but the true is that all lives matter and we are all equal. RACISM COMES IN ALL COLORS .. B.S and very tired of this.	0	3	Could be intending to downplay the BLM movement
1740	females don't do engineering as much cause they start to lack the social support when the study gets too hard or when the job demands are high and no one is there for them emotionally so they drop out.	0	1	Not hope talking about an issue
1741	ALL LIVES MATTER!nHey	0	3	Could be intending to downplay the BLM movement
1742	I am also bi and religious and I believe that God loves everyone even us	0	0
1743	I cried while watching this video. Clearly pain is being reflected in every word when the guy was talking about abuse. There are so many evil people in this world. I hope no one ever goes through such pain at early age in their life.nThank you HiHo for creating this video. I'm learning a lot. I also showed this video to my little sisters and now they have also subscribed to your channel.	0	0
1744	Yes Black lives matter but anti American socialism should have no part or say in the future of true Bible believing black Americans or their children and thei families! Take care.	0	3	Could be intending to downplay the BLM movement
1745	A kind gentle man has to endure torture because he just prefers his own gender. Whatever sexual acts he does at least 90% of heterosexual women do for their partners also. Why is it so terrible. What is wrong with religious people to condemn something that is neither bad or unnatural. The profess to be the religion of love yet are so hateful and intolerant.	0	1	Not hope, It talks about the bads of religion. That is the main idea.
1746	I played with Lego and blocks as well as dolls when I was younger. I played with you cars	0	1	Not hope just an assertion
1747	Very well said Gentlemen. All lives matter! Bernie i wanted to vote for you but not no more because I ALSO MATTER. I am Hispanic .	0	1	Not hope, It is addressed to the person whom the commentor no longer wants to vote for.
1748	GREAT!!! WORLD NEEDS THAT	0	0
1749	ALL LIVES MATTER! The current discussions are racist and those who call out others being a racist	0	3	Could be intending to downplay the BLM movement
1750	I can't believe that people like me are put through such abuse. It breaks my spirit.	0	1	Not Hope, talks about the effects of abuse.
1751	Bbm add#11 nI don’t think conversion therapy is helpful to people regardless if they could choose it or not. For I don’t even think it is real therapy it would be trying to force someone to be something they’re not is that really therapy? Also I don’t think the therapy that this guy is talking about is very good for you mentally.	0	0
1752	Amazing talk! What a terrible professor to be so discouraging and daring to make fun of students-this really triggered me and reminded me of one of my former chemistry professors-so rude that everyone stayed quiet out of fear of her retaliating and giving bad grades.These people should NOT be teaching! I'm so glad Debbie didn't give up	0	1	Definitely not Hope, the main idea is about a professor that the commentor finds terrible.
1753	I'm studying to be a civil engineer..hope I succeed	0	0
1754	All humanity matters.	0	0
1755	All lives matter . Including every race . Whites are the minority on this planet . Fact	0	3	Controversial
1756	I’m a helluva engineer and the fact that I am an attractive female means nothing. You cheapen the degree by isolating women from men. I graduated from GT in 1988. It was a 1	0	0
1757	Truly said.. That what I was waiting for. To let the world realize about girls and engineering.	0	0
1758	@kennedy mensah if black lives matter how do you take out the black from BLOOD?? What makes a person BLACK? my son is white but looks black	0	1	Not Hope, the comment is trying to disprove an ideology of the person to whom it is addressed
1759	There's always a way out and Madonna is just changing the world for the better!	0	0
1760	Jessica Walker I think most people don’t even know what you are trying to argue about. I agree with you. Most people may or may not like homosexuals but it’s just an opinion it’s really not like they hate them. I personally don’t support homosexuality but I also don’t hate them. I just don’t support them in general. I do have one friend who is bi but I don’t really mind that he’s bi just as long …	0	0
1761	DEFENDING the right of the LGBTQ community to live however they like and being accepted for who they are AND in the same time ATTACKING someone because they have a different opinion/belief (maybe similar to what those horrible people are justifying their actions with) as long as they are not personally hurting anyone is highly HYPOCRITICAL.nIf you don't have anything good to say respectfully	0	1	Not Hope, the last line shows that the comment is not hope indpiring to whom oit is addressed
1762	The little Asian girl and Indian/Pakistani boy were extremely understanding	0	0
1763	“god gave us a choice; mine is to love”nnnPREACH	0	0
1764	For anyone coming out it’s always hard too come out	0	1	Not Hope, talks about how hard it is for ppl to come out which in itself is not hopeful.
1765	I don't know why i cried after watching this. Maybe because i feel what she felt during the times she almost give up because of the peer pressure and perspective of other people. But i kept saying to myself that i am worthy of being successful engineer. Truly this makes me more appreciate what girls can do.	0	0
1766	WE WILL NEVER GIVE UP!! LGBTQI+ RISE!!!!	0	0
1767	I'm man She is beautiful and sure she is just as good as any man engineer	0	0
1768	PATTYY L maybe she is a revolian. You can’t assume people’s sexualities like that. Accept that times have changed and straight people can look however they want.	0	0
1769	Im religious and lesbian	0	1	Not Hope just an assertion
1770	They're scared of the truth! That a confident woman is very powerful and can acomplish anything she wants just like a guy! By the way I'm a guy!	0	0
1771	There are no words to describe her influence in so many areas. As a long time fan I am still discovering new things every day. She leads the pack	0	0
1772	Thank you for sharing your experience. I my self had the same feeling where I did not fit in as an engineer. It is good to know that I am not alone with this situation.	0	0
1773	Tyrone Marcus no we are his children he loves us all we aren’t bad people we make mistakes	0	0
1774	God gave us a choice	0	0
1775	AMEN! that’s the truth. Jesus told us to love	0	0
1776	pats you on the back it's okay	0	0
1777	Beautiful and honest interview. She has taught me so much. She continues to fight the haters. Inspiring me always.	0	0
1778	Thank you so much. We can do anything!	0	0
1779	Madonna is such an amazing person... She makes the world a better place!	0	0
1780	I believe in humanity now.	0	0
1781	Every parengts wiling to put their child into mental and physical abuse in one of those so called therapy camp should be charged for child abuse. This is revolting and I don't understand why in the Obama era they didn't do anything. Now with Trump it's gonna continue and worsen	0	1	Not Hope, against the therapy camp being talked about.
1782	Mehdi Benchekroun All Lives do matter. But in America black people haven’t been treated like they matter.	0	0
1783	No one says it to be racist they say it because it’s true it’s not the color it’s the character	0	1	Not Hope, the commentor is stating some facts they believe to be true.
1784	Sunshine littlephilly hmm i wasn’t aware that loving my soulmate who is a girl would send me to hell...kinda makes me the happiest i’ve ever been. love is beautiful no matter what form	0	0
1785	Annie is really muture I suppose. Although I thought she WAS lgbt I wasn't expecting Her to be against it.	0	0
1786	I was waiting on one of them responding to him asking Do you know anybody LGBTQ+? to say Yeah me.	0	1	Not Hope just an unfulfillled expectation
1787	Good luck! You can do it (	0	0
1788	This woman changed the world and keeps changing it. Including my life. Thank you	0	0
1789	I will always be thankful for Madonna! She’s A reason I’m not afraid to be me. I even have a portrait of her	0	0
1790	ya boy just went out and bought goldieblox. you're so inspirational	0	0
1791	If all lives were on the chopping block i sure the message would be ALL LIVES MATTER .. but unfortunately it's us black men who's lives are on the chopping block.	0	0
1792	All Lives Matter! The color does not determine persons worth	0	0
1793	Therapy and surrounding yourself with loving and accepting people hopefully	0	0
1794	I hate all people who can't see past the colour of anyone. I can't imagine what there family are going through but I do think that people should think first. We are in a global pandemic at the moment the people involved will get what's coming to them but STOP the rallies till the end of the pandemic it's still spreading stay home and stay safe	0	0
1795	why is black lives matter even a thing	0	3	Could be intending to downplay the BLM movement
1796	I pray to get the chance to thank her for keeping me alive during a very bad time in my life as a young teen!! She is a legend beyond legends!!! Thank you Madonna!	0	0
1797	omg we are the people All LIFES ARE important	0	0
1798	Thank you Madonna you're by years an inspiration and an openminder knight.	0	0
1799	james bolem look up the actual meaning of BLM 2020. We want equality for all races. We want to end oppression. We want to end killing of innocent ppl. We want to end brutality. We want to end stereotypes. If you can’t see that	0	1	Addressed to james and calling out james' ignorance
1800	Some kids at my school have already come out	0	0
1801	I think ALL LIVES MATTER	0	0
1802	When I was 12 I figured out that I was lesbian my mom said that I’m not her daughter anymore and sent me to my auntie in Newzeeland	0	1	Not hope clearly, highlights how parents can be disapproving.
1803	That's really great...Yeah...That's it...One person can make all the difference	0	0
1804	I can't imagine family putting their child thru tortuous conversion program. Embrace and love your kids for who they are.	0	0
1805	from djibouti that was great but you had courage to achieve your aim	0	0
1806	@Jessica Walker yeah but Jesus said to love everyone and I don’t understand what religion has to do w two ppl loving eachother	0	0
1807	Both Madonna and Elizabeth Taylor never turned their backs on the gays.nThey were both very involved with support for research from the very beginning of the AIDS crisis	0	0
1808	The lgbtq helped launched Madonna and the fact she basically knowdlgeses it every time in her song and in her daily life is iconic	0	0
1809	I find it difficult to say that I hate Islamic culture but not the individual people	0	1	Clearly not hope, talking about hating a certain culture.
1810	These young people are VERY enlightened and so very compassionate.	0	0
1811	she saved my life too and i am not exaggerating	0	0
1812	I cant believe I live In a world where saying all lives are important is condemnable 🤦‍	0	3	Could be intending to downplay the BLM movement
1813	Wow am studying mechanical engineering and this is motivational so much as a female	0	0
1814	I am a Tunisian Machine Learning Engineer. I'm very proud of my choice.	0	0
1815	Okay so I am majoring in engineering and this video hit me so so hard. I'm literally on a study break after 2 hours of studying mechanics of materials	0	0
1816	Skrezo Loving the same gender is a sin? Then a good chunk of the population is a sinner. There is nothing wrong with being LGBTQ+.	0	0
1817	God loves all his creation	0	0
1818	@Kurt Sandberg if you are saying that in response to BLM then let me give you a lesson. The reason black lives matter started was because we want all lives to matter. Saying all lives matter is just being selfish and wanting to not feel like the bad guy. Because whites aren't bad	0	1	Not hope, against kurt, and it is a response to kurt i.e. addressed to kurt
1819	I'm a straight Christian female from a religious family and our mindset has always been that just because I don't agree with your choice does not mean i'm gonna hate you for it (it's like hating someone because theyre a different raligion). A few of my best friends are LGBT and that kid phrase it better then I ever could	0	0
1820	Girl and boys are equal engineers. I like that she did not give up. Like when her classroom teacher humilates her and she start's to cry. I also think she had a good idea about a girl construction toy.	0	0
1821	You all have to remember what Martin Luther King said. I have a dream that my four little children will one day live in a nation where they will not be judged by the color of their skin	0	0
1822	well the media wouldn't be able to support itself unless it was appealing to at least some subset of the population	0	1	Not hope, cause ideally media should be unbiased and the comment says otherwise.
1823	I took up an Industrial Engineering course long time ago I didnt finish my course. 1st year to 3rd year I was doubting myself that I cannot make it to the final year and when I reached the 4th year that was the moment that I was so eager to finish the course but unfortunately I wasn’t able to enrol for 2nd semester due to financial challenges. When the speaker said that they were on 5 female stud…	0	1	Not hope, regret
1824	Because being straight is the norm and people assume that everybody is straight. Because a lot of people are homophobic you grow up hating yourself and being fearful to say who you truly are.	0	1	Sad as the person talks about hating themselves.
1825	Think about it this way by only saying black lives matter you are putting down every other race including Native Americans. They have it every bad because they got pushed out of their homes where their beliefs are so their basically taking a page out of Hitler’s book and say that Black is the master race when that isn’t true because there is no master race everyone should be equal.	0	3	Could be intending to downplay the BLM movement
1826	@batman’s ass here are too many trolls who even give LGBT a bad light. It's just embarrassing and shows what a low IQ they got	0	0
1827	@QueenOfIndians She's always done what is daring or pushing boundaries. Any negative publicity she's every gotten has only increased her celebrity. Evidence	0	0
1828	Who else is a free-wheeling lesbian who wanted to hug this man	0	0
1829	All. Lives. Matter. Always.nIf you don't like it	0	3	Could be intending to downplay the BLM movement
1830	That's horrible and inexcusable to do to another human being even more so a child! Whether a person agrees with homosexuality or not DOES NOT give them the right to play God and judge another on their sexual preferences. I believe in reading the Bible and showing love and acceptance in one another and focus on verses such as John 8	0	0
1831	I got a degree in chemical engineering because of this video! I still cannot believe I did it ! Still debating if it was a good decision but hey it can't be undone now ... XD	0	0
1832	Is conversion therapy illegal because it often times involves physical and mental abuse or do people just ignore that?	0	0
1833	Can you give me some tips to be a good friend to my friend? MY HEART	0	0
1834	I’m pansexual and non binary and proud ;p	0	0
1835	where do they get these kids?! they're so thoughtful.	0	0
1836	I'm glad to hear that you're figuring out who you are and that you have someone to talk to. I strongly recommend that you talk Kanta/Diya about how you're feeling	0	0
1837	Nobody has supported the LGBT community like MADONNA even in the darkest hours she has always been an advocate a fighter for human rights	0	0
1838	All life on the planet is the most precious thing God has given anyone or anything once it is gone that is it so remember this and quit fighting over it all life matters right from the smallest tiny thing to the most ignorant thing on the planet that is most fun in lightning and unwoke the human being 🤔🤔🤨	0	0
1839	In my Engineering and Architecture Department around half the students are women It has really come a long way as to decades ago where only a handful of women are in class. Our landscape architecture and chemical engineering graduates are all women. Why? I have no idea to be honest	0	0
1840	All lives matter and I will never kneel to anybody except God	0	3	Could be intending to downplay the BLM movement
1841	All Lives Matter	0	3	Could be intending to downplay the BLM movement
1842	Only black life is matter ? . WHEN it should be EVERY LIFE IS MATTER . nPlease don't start riot and looting destroy in name of others like it's happen in UK and America. It's discussing . Protest peacefully . No one should be above the law no police officers and no protester	0	3	Could be intending to downplay the BLM movement
1843	This is very inspiring. I am studying civil engineering	0	0
1844	I am doing aerospace engineering. I am in my first year.Tbh I was a little doubtful but this video inspired me alot. Thanks	0	0
1845	All lives matter and frankly from what I've seen is that gun laws in America are yet again the true problem whether out of prejudice towards the colour of skin I think it's ludicrous the chances between the rich and poor are divided and that is where the true issue is it is difficult to get rid on one bigoted billionaire that so happens to be the president of the United States but laws around the…	0	3	Could be intending to downplay the BLM movement
1846	I didn't know that there was a stereotype that Lego toys were for boys. I thought everyone has them.	0	0
1847	This itself is inspirational	0	0
1848	You are AWESOME and so inspiring...	0	0
1849	All lives matter! Stop dividing people by skin color!	0	0
1850	WELL SAID BROTHER SPEAKING OUT FOR BABIES IN THE WOMB BECAUSE ALL LIVES DO MATTER I PRAY EVERYDAY THAT WE COULD JUST LOVE EACH OTHER NO MATTER THE COLOUR OFOUR SKIN ONLY LOVE FOR ALL MAN KIND IS THE ANSWER OUR CREATOR GOD MADE ONLY ONE HUMAN RACE WE ARE ONE	0	3	Could be intending to downplay the BLM movement
1851	Ada Lovelace. Grace Hopper. Nuf said.	0	0
1852	Wow! I'm 13...I want to become an engineer!...People have told me tht I would never fit in cuase I'm a girl...I even had a teacher told me once..tht I should go to fashion school and let the boys do tht hard work...after seeing this in 2018!...I want to become an engineer and inspired girls too just like you do!	0	0
1853	My goodness these kids are so enlightened! So smart	0	0
1854	People should never have to be ashamed of their race or anything else. None of us are responsible for what people in the past did. We are responsible for what we do in our present. ALL LIVES MATTER. Thanks for your post Zackary!!!	0	0
1855	She has never been afraid to say these are my friends and I love them.nThis was well before it was fashionable to embrace the gays.nShe and Elizabeth Taylor were throwing millions of dollars towards AIDS research in the beginning	0	0
1856	I chose love too	0	0
1857	Stop racism at it's source	0	0
1858	it isn't. all lives matter	0	3	Could be intending to downplay the BLM movement
1859	I'm a teenage girl who wants to become an engineer. I was talking to a friend recently about why he decided that engineering wasn't for him	0	1	not hope inspiring
1860	Same Im Roman Catholic and Im bisexual too	0	0
1861	When i was a little girl i didn't like barbies but my parents kept bringing them but i kept playing with my cousin's legos and my teacher used to gave me legos when i get a full mark	0	1	An anecdote does not necessarily inspire or give hope
1862	proud of you GOOD LUCK	0	0
1863	Is normal to be terrified but to be brave does not mean abscense of fear but to act despite the fear!	0	0
1864	@SCTiger No it's common sense	0	1	Nothing hopeful
1865	A study shows that women have sharper mental skills than men. But the main problem is perspective... What perspective?!!! nThe perspective that says	0	1	A study, it is unbiased not hope
1866	Please for god sake just let people live their lives how they want.	0	0
1867	A hate crime is when you're attacked for being gay or black. Just fighting a minority isn't a hate crime. Unless it is.	0	1	Just a statement
1868	Tyrone Marcus god loves everyone no matter what.	0	0
1869	Exactly!..... I guess that’s not what they’re fighting for.... Obviously ...So many innocent people have died ... Business is ruined.... people hurt and injured.....for what ? For who’s behalf ? How can one justify this ? ..... I thought the whole point was for the country to come together for the good of the country and for everyone...	0	1	Talking about devastation of fighting
1870	GOD LOVES ALL OF MANKIND. HE HIS NO RESPECTABLE PERSON. IN HIS LOVE ALL LIVES MATTER.	0	3	Could be intending to downplay the BLM movement
1871	All Lives Matter	0	3	Could be intending to downplay the BLM movement
1872	@QueenOfIndians She's always done what is daring or pushing boundaries. Any negative publicity she's every gotten has only increased her celebrity. Evidence	0	0
1873	im guessing the people who do that want people to know that they are friends with the just for validation	0	0
1874	Jemel Shahid if it's obvious that all lives matter	0	0
1875	conversion therapy subjects people to abuse and many people who survive it end up with some sort of trauma disorder	0	0
1876	Every lives matter... all lives matter God bless Us all God said love one another.	0	0
1877	Jesus died on the cross for all of us	0	0
1878	Now we wait...nnwhen the dust clears the good will inherit the world	0	0
1879	All lives should matter please	0	3	Could be intending to downplay the BLM movement
1880	thats funny because last time i checkednn1.Women are smarter than men.nnOnce women started demanding equal rights	0	1	Not hopeful, seems derogatory towards women
1881	of course you reached your goal	0	1	Not hopeful
1882	@ImAlfie you can't decide someone's sexuality wtf... the leg crossingni cross my legs therefore the person sitting opposite me on the train who's never spoken to me has the right to decide i'm bi or whatever	0	0
1883	owen eiffel Jesus said to love everyone no matter what.	0	0
1884	Heh yeah coming out is really scary.nWhenever I feel confident enough to try and come out	0	0
1885	Emilia C girls being engineers are common in my country.	0	0
1886	Having homossexual relationships used to be normal in old Greece.r The Spartans accepted it as a way of creating bond between warriors	0	0
1887	If you believe in God and the sacrifice that was the only begotten son to be sacrificed for all of HUMANITY! nnAll lives DO MATTER! nnWhat BLM is trying to institute is; the same horrible generalization that befell the entirety of the Germanic nation	0	3	Could be intending to downplay the BLM movement
1888	As a Christian conversion therapy should be on a voluntary basis and should be closely regulated and meet the guidelines human rights. All these tactics are causing more trauma for the child/individual and not representative of true Christians. Minors should not be sent to these camps	0	0
1889	@Molly Rebekah Girl I'm Christian too and you are waaaaaaaaaaaaay outta line. What I'm taught from the bible and what I see it saying is that we should love all. Do you believe that God loves each and every one of us cause that's what we are taught as Christians that he loves everyone of us. So the fact you think God doesn't like LGBTQ people is misinformed because God loves all of us not just so…	0	0
1890	Before that he also said hate isn't going to get you anywhere which is something people in general (not just homophobic people) need to learn.	0	0
1891	I feel i will cry.. it happen to me everyday at the university but I am so grateful to be there thanks for inspiring us	0	0
1892	Why do people take homosexuality as something bad. It's natural	0	1	Just a question, not hope speech
1893	The gays are so wonderful.	0	0
1894	@The Great Hufflepuff Okay? Still doesn't prove anything. We don't know her sexuality and it doesn't matter to any of us.	0	0
1895	I'm so proud of you !!! keep your head high and keep fighting for your dreams...we need women in science ! we	0	0
1896	WTF let them love anyone. IT'S NONE OF YOUR BUSINESS	0	0
1897	All life's matters	0	0
1898	@Aaron Lehman So it would be ok for a group of all-white people to walk around with banners that say 'White lives matter' and shout it out to all black people?......white people die too...and we know it's sad and enraging and emotional but we can't afford to seperate ourselves like that...seperation and segregation IS racism......don't fight racism by being racist...just be Human. All lives matte…	0	3	Could be intending to downplay the BLM movement
1899	Came out and fought back because of her. New and ungrateful generation has no clue what she has done for us.	0	1	Lack of context
1900	Great Thoughts with positive outcomes and Inspiring new generation.	0	0
1901	@FiberHive ALL LIVES MATTER. Is the message. BRO	0	3	Could be intending to downplay the BLM movement
1902	If you think saying ALL LIVES MATTER then don't say BLACK LIVES MATTER! It works BOTH ways folks. The BLACK LIVES MATTER statement is offensive to me!	0	1	Clearly downplaying BLM
1903	Everyone on this episode was super insightful	0	0
1904	Conversation therapy is so disturbing to me and should be illegal	0	0
1905	80s baby here. Madonna was made by the lgbtq community. She was there for them	0	0
1906	“god gave us choice and my choice is to love”	0	0
1907	I am 15 and i don’t think i can tell my parents i don’t believe in the religion they have taught me to believe in ever since I was born. nnI don’t believe in the textbook version of God	0	1	Not hopeful, talks about being unable to open up to parents.
1908	I’m bisexual and still in the closet. I don’t know how long I will be staying in there for.	0	1	Not hopeful, is unable to open up and is talking about that.
1909	Yo for real why do all of you guys care so much about what her sexuality is gonna be? Because she has short hair and wears cuff jeans? A lot of people wear cuff jeans and have short hair that aren't LGBT+. I'm okay if she does become LGBT+	0	0
1910	She is pretty and smart!! wow!!!	0	0
1911	@1MinuteFlipDoc Assuming other people's sexuality and preferences and acting as if it something you can't help to do is being judgemental	0	0
1912	How easy is it to amend the constitution to remove term limits? (I'm not American so I wouldn't know.) I feel as long as the president is democratically elected	0	1	Just a question
1913	All lives matter no just black u see if a black cop did this to a white man nobody would care of course he didn't deserve to die like this nobody should but still if this was vice versa people wouldn't care and I know because this has happened in the past and nobody protested for him	0	3	Could be intending to downplay the BLM movement
1914	All Lives Matter	0	0
1915	I hope that all life Matters... In many years many People	0	0
1916	Racism is discriminating or treating somebody unfairly because of their skin color	0	1	Not hope just stating a fact/ defining racism.
1917	I'm a female first year engineering student in South Africa and I struggled a great deal with engineering drawings in my first semester. Debbie's talk was just so relatable to me and extremely inspiring!	0	0
1918	ALL LIVES MATTERS WETHER YOU ARE BLACK WHITE BROWN BLUE YELLOW ALL HUMAN'S LIVES MATTER IN THE SIGHT OF GOD CHRIST SHALOM	0	0
1919	Yes!!! I study CS and it is so so lonely. These types of videos keepnMe going	0	0
1920	All lives matter!!!!!nThe unborn	0	0
1921	Every life matters.	0	0
1922	Same here. I never saw it as something I wouldn't be able to do if I wanted to. And I never thought being female should play a part in that. Who cares if there are fewer women in the engineering fields than men?! I'm here because I wanted to work on engineering projects	0	0
1923	Black lives matter all lives matter regardless of skin colour	0	0
1924	WE NEED MORE GIRLS IN THE STEM FIELDS! JOIN US	0	0
1925	The boy who said “god gave us a choice and my choice is to love” is the purest	0	0
1926	What i don't understand about most of these comments is that people are saying that girls with short hair are automatically lesbians or the clothes they're wearing. Looks don't Define Who You Are. It doesn't mean if a girl has short hair or if they're clothes not girly enough doesn't mean girls are automatically lesbians!! You can't just put a label on someone and call them something that they ar…	0	0
1927	All lives matter. There is only one life. It is common to all creatures that are alive. It's called pranna.	0	0
1928	@Roses & Dragons Find me one comment where I said it was wrong to love someone? I have love for everyone in this world and I have made that very clear throughout this thread. All you see is hate and it's because you have hate in you. You love some and hate others. I love ALL people	0	0
1929	Omg when he said ‘God gave us a choice	0	0
1930	All lives MATTER. God created life	0	0
1931	I guess this is a better start to getting us back to where we were before with children's toys. I just don't see the reason for toy company's to have gone that route in the first place? Or maybe our culture should stop genderizing professions. Though	0	1	Lack of context
1932	It seems some people need a dictionary definition of the word “ALL” which includes everything of a group. All Lives Matter	0	3	Could be intending to downplay the BLM movement
1933	Racism is part of Capitalism	0	1	Someone's opinion
1934	BLM winning hearts and minds wherever they go..	0	0
1935	I don't give scrap who hate for me .... ALL LIVES MATTER regardless of race	0	0
1936	He is very courageous	0	0
1937	@Black Lyfe ofc all lives matter equally. We all bleed the same. But people only started saying white lives matter and all lives matter to take attention away from the BLM movement. BLM is about equality for all lives	0	0
1938	There is a God and He is good. Beauty plus brains trumps everything else. She is likely one of the most intelligent CEO's around and the hottest ever speaker on TED Talks.	0	0
1939	ALL lives matter ! THAT includes ALL LIVES ! Whether you are doing homework in your house	0	0
1940	This person inspired me to be an engineer. This makes me really happy I really needed this	0	0
1941	That’s why I love her she made me feel that being different is okay her music change people life’s	0	0
1942	Great talk. We also need more women in science	0	0
1943	We need to see black people as people	0	0
1944	@ozzie pants nI could say the same thing to you. I've made many new points including how affirmative actions could hurt minorities as well	0	0
1945	All lives matter. Cops are abusive to all of us and there is a problem. Focusing on only black lives and shutting down the white person's voice is the Social Justice warrior way. It is totally destructive. The poor are being kept poor black or white. It is the poor that has more interaction with the police and are more susceptible abuse by the police. The minimum wage needs to be high enough so t…	0	3	Could be intending to downplay the BLM movement
1946	@Sasha Dumse and god made other humans to love each other	0	0
1947	And aside from how many girls major in engineering	0	1	Lack of context
1948	I want you to know that I watched this video when I was ten years old right when it came out. I have never been more grateful for a video. Since I watched this I have changed my entire trajectory. All of my goals and everything I spend my time on is to become an engineer. I am now a Junior in high school and I have been on a robotics team for 5 years. I spend my time teaching other people about e…	0	0
1949	my choice is to love	0	0
1950	I used to think All Lives Matter.......no days	0	1	Unclear without context
1951	100% sounds like something my daughter would LOVE! She is always building and making things out of boxes and tape and paper and pretty much anything she can get her hands on.	0	0
1952	There are lgbtq persons who do bad things. Thats a given. But that shouldnt be the license to hate everybody else in the lgbtq sphere cause a lot of us are nice and righteous. Generalizing is what needs to go. Ps	0	0
1953	Shrödinger Kat well that’s just absurd because God created all human beings all different colours and shapes and sizes	0	0
1954	I'm so happy I live in a country that accepts homosexuality and conversion therapy doesn't exist in where I live.	0	0
1955	All lives matter because we are God’s most precious handiwork.	0	0
1956	Would it be racist if an audience booing someone who said black lives matter. All lives matter	0	3	Could be intending to downplay the BLM movement
1957	“I am religious - but it’s not meant to hate everybody because hate’s not going to get you anywhere in the world. God gave us choice - and my choice is to love.”nnAweeeeeew wow 🤧	0	0
1958	i am pursuing electrical engineering and i donno why this brought me in tears.	0	0
1959	I'm a girl who grew up with Lego's	0	1	Just a statement, not hope inspiring.
1960	You don’t dictate my future . I don’t care what color you are and I don’t care if I’m a Mexican American	0	0
1961	All life MATTER!!! White	0	3	Could be intending to downplay the BLM movement
1962	She came out	0	0
1963	I've finally decided what I want to be. I want to be an Industrial Engineer.	0	1	Someone's career choice, nothing hopeful as such
1964	The problems that they bring up are real and are faced by women in the tech industry. It may not seem like	0	0
1965	More men should be teachers and nurses. It should be 50-50.	0	1	Someone's opinion, nothing inherently hopeful
1966	lucky you! I hope I can find my way to be such great woman! Wish me luck!	0	0
1967	@Cindy Boa In US women are given preference over men by 2	0	1	Nothing hopeful, talks about bias
1968	Love the interview. Very vulnerable. A lot of women was inspired by her too	0	0
1969	all lives matter in Gods eyes	0	0
1970	lgbt youth rise up!!‍	0	0
1971	All lives matter even little. EVEN LITTLE ABORTED BABIES THAT HAVE BEEN KIILLED ALL LIVES MATTER EVEN THE BABIES AN CHILDERN WHO HAVE BEEN KILLED BY THEIR PARTENTS AN CHILD MOSLESTERS AN SO ON . ALL LIVES MATTER TO GOD TOO AN THAT MEANS ALL LIVES	0	3	Could be intending to downplay the BLM movement
1972	Zara Hassan not the same. The girl has respect for LGBTQ+ people. She doesn’t agree with being that	0	3	Unclear without context
1973	ALL LIVES MATTER! If you feel as if you deserve more well get up off your b---! Put your guns down stop killing and robbing	0	1	Not hopeful, could be intended to downplay BLM too
1974	Racism is everywhere.Though Many of the BLM people are doing some retarded shit. You wouldnt understand how they felt unless you were black.	0	1	Not hopeful, goes onto abuse the people beinig talked about.
1975	All people of good character matter	0	0
1976	all lives matter isn't discriminating along racial lines	0	3	Could be intending to downplay the BLM movement
1977	Islam is just like feminism in the fact that the definition on both sounds great	0	1	An opinion, nothing hopeful
1978	All lives should matter. Not just only back lives that matter us	0	0
1979	I wish that people weren’t so heartless. She truly is an advocate for bettering the lives of others. I just wish that the so many lives were never taken away.	0	0
1980	Madonna speaks the truth no superficial how wonderful	0	0
1981	I know that was so sweet of the boy to to say hope he knows is a good person	0	0
1982	I could maybe be sympathetic if they were less vague. All I hear is them ascribing sinister motives to people who seem like they are just being overly friendly nerds.nAnd these testimonials right before the statstics on women engineers in Silicon Valley seem to imply that the reason that there are less women in tech there is because it is a hostile environment for women. But step in your typical …	0	0
1983	this is inspiring . i'm a mechanical engineering student and i needed this so bad	0	0
